# Supplementary material for: Relationship between gut microbiota and thyroid function: a two-sample Mendelian randomization study
Source: Front Endocrinol (Lausanne). 2023 Sep 26;14:1240752. doi: 10.3389/fendo.2023.1240752 (PMC10562735; doi:10.3389/fendo.2023.1240752)
Supplement: Supplementary file 2 [file Table_1.xlsx]

## Sheet: Sheet1
SNP	effect_allele.exposure	other_allele.exposure	beta.exposure	beta.outcome	se.outcome	se.exposure	pval.exposure	pval.outcome	samplesize.exposure	exposure	outcome	R2	F
rs11252894	A	C	0.0784055	0.0072	0.0085	0.0162769	1.10556e-06	0.3968	12381	phylum.Verrucomicrobia.id.3982	FT4	0.0018706	23.1995
rs117107102	A	G	0.204283	0.0151	0.0177	0.0427565	2.67935e-06	0.3944	5071	phylum.Verrucomicrobia.id.3982	FT4	0.00448141	22.8185
rs11729256	T	C	0.0696984	-0.0159	0.0078	0.0146953	2.23402e-06	0.04195	12377	phylum.Verrucomicrobia.id.3982	FT4	0.00181419	22.4914
rs12512971	A	C	0.171057	-0.0111	0.0165	0.0398053	9.81381e-06	0.5024	3919	phylum.Verrucomicrobia.id.3982	FT4	0.00469009	18.4577
rs12908520	G	A	0.0594916	-0.005	0.0065	0.012823	3.40448e-06	0.4435	12380	phylum.Verrucomicrobia.id.3982	FT4	0.00173562	21.5209
rs2602429	C	T	0.0764148	0.0003	0.0086	0.0153487	8.7104e-07	0.9712	12104	phylum.Verrucomicrobia.id.3982	FT4	0.0020436	24.7823
rs3995795	C	T	0.0610914	0.0033	0.0074	0.0138592	9.72209e-06	0.6576	12104	phylum.Verrucomicrobia.id.3982	FT4	0.00160273	19.4273
rs45598138	C	A	-0.143901	0.0079	0.0164	0.03054	2.19127e-06	0.6278	9932	phylum.Verrucomicrobia.id.3982	FT4	0.00223042	22.1975
rs61779207	G	A	-0.0755253	0.01	0.0084	0.0164385	5.27971e-06	0.2331	12087	phylum.Verrucomicrobia.id.3982	FT4	0.00174336	21.1052
rs74542928	T	C	0.115994	-0.0143	0.0117	0.0231324	4.08375e-07	0.2224	11703	phylum.Verrucomicrobia.id.3982	FT4	0.0021439	25.1396
rs76430504	T	C	-0.11753	0.0245	0.0145	0.025458	3.4956e-06	0.09117	11624	phylum.Verrucomicrobia.id.3982	FT4	0.00183019	21.3095
rs9349825	A	G	-0.0660243	0.003	0.0074	0.0143911	6.27486e-06	0.6854	12373	phylum.Verrucomicrobia.id.3982	FT4	0.00169826	21.0449
rs10108398	G	A	0.0769142	0.0054	0.0076	0.0153953	1.09e-06	0.4754	10932	phylum.Tenericutes.id.3919	FT4	0.00227797	24.9551
rs11890098	A	G	0.074438	0.0049	0.0079	0.0153389	9.56571e-07	0.5352	11392	phylum.Tenericutes.id.3919	FT4	0.00206304	23.5466
rs12566890	T	G	-0.101147	-0.0056	0.0131	0.0230978	3.65095e-06	0.6711	11371	phylum.Tenericutes.id.3919	FT4	0.00168358	19.1729
rs17214486	C	A	0.06099	-0.0013	0.0069	0.0135623	6.60866e-06	0.8503	11387	phylum.Tenericutes.id.3919	FT4	0.00177285	20.2198
rs2464826	A	C	0.0944239	0.0087	0.0103	0.0211806	8.39505e-06	0.3953	10998	phylum.Tenericutes.id.3919	FT4	0.0018038	19.8705
rs28537087	G	A	0.0820873	0.0062	0.01	0.0188312	8.07399e-06	0.5311	11382	phylum.Tenericutes.id.3919	FT4	0.00166669	18.9986
rs3768491	A	G	-0.0681052	-0.0031	0.0072	0.0149061	4.23352e-06	0.6703	11002	phylum.Tenericutes.id.3919	FT4	0.00189381	20.8715
rs4885016	T	C	-0.0819606	-0.0101	0.0091	0.0181628	7.26986e-06	0.2707	11388	phylum.Tenericutes.id.3919	FT4	0.00178493	20.3596
rs6043847	T	C	-0.114937	-0.0054	0.0138	0.0248606	4.55476e-06	0.6944	11130	phylum.Tenericutes.id.3919	FT4	0.00191677	21.3707
rs72901605	T	C	-0.0841852	0.0246	0.0085	0.0178119	3.2579e-06	0.003894	10526	phylum.Tenericutes.id.3919	FT4	0.00211771	22.3341
rs74603314	T	C	0.221639	-0.0123	0.016	0.0462918	1.55689e-06	0.4407	4499	phylum.Tenericutes.id.3919	FT4	0.00506947	22.9136
rs78169027	A	G	-0.108283	-0.0074	0.0115	0.0237289	5.8761e-06	0.5225	10542	phylum.Tenericutes.id.3919	FT4	0.00197144	20.8201
rs10750258	A	C	-0.0491248	-0.0035	0.0068	0.010824	8.71899e-06	0.6139	18250	phylum.Proteobacteria.id.2375	FT4	0.00112738	20.5957
rs11126162	T	C	-0.0770689	-0.0153	0.0123	0.0187079	9.25979e-06	0.2155	18250	phylum.Proteobacteria.id.2375	FT4	0.000929058	16.9692
rs11715072	G	A	-0.0519289	0.0116	0.0071	0.0115246	6.90409e-06	0.1035	18249	phylum.Proteobacteria.id.2375	FT4	0.00111133	20.3009
rs12467198	C	T	0.0498267	0.0009	0.0072	0.011138	6.30669e-06	0.9044	18238	phylum.Proteobacteria.id.2375	FT4	0.00109612	20.0108
rs2347697	G	T	0.0502281	-0.0012	0.0069	0.0108968	4.26914e-06	0.8661	18248	phylum.Proteobacteria.id.2375	FT4	0.00116299	21.2446
rs2532663	G	A	-0.125578	-0.0028	0.0168	0.0258034	7.46812e-07	0.8681	13013	phylum.Proteobacteria.id.2375	FT4	0.0018168	23.6814
rs3890996	T	G	-0.0474614	-0.0019	0.0073	0.0105645	6.94663e-06	0.7954	18120	phylum.Proteobacteria.id.2375	FT4	0.00111262	20.1808
rs4340090	C	T	-0.0668162	0.0038	0.0094	0.0153387	9.99003e-06	0.6884	18250	phylum.Proteobacteria.id.2375	FT4	0.00103865	18.973
rs6707783	C	T	0.0849593	0.0078	0.0112	0.0187782	8.08593e-06	0.4848	17324	phylum.Proteobacteria.id.2375	FT4	0.00118019	20.4674
rs72771021	C	T	0.141726	0.0417	0.0188	0.0309242	7.18097e-06	0.02663	9009	phylum.Proteobacteria.id.2375	FT4	0.00232602	20.9993
rs922773	C	T	-0.0803778	-0.0033	0.0093	0.0157851	3.67958e-07	0.721	18132	phylum.Proteobacteria.id.2375	FT4	0.00142794	25.9256
rs1002941	G	A	0.107661	0.0111	0.0073	0.0233382	4.3088e-06	0.1283	4739	phylum.Lentisphaerae.id.2238	FT4	0.0044704	21.2714
rs11770843	C	T	0.111896	0.0144	0.0073	0.0234776	1.13813e-06	0.04677	4709	phylum.Lentisphaerae.id.2238	FT4	0.00480064	22.7056
rs17114848	G	A	0.148972	-0.0035	0.0118	0.0324162	6.76994e-06	0.7674	4739	phylum.Lentisphaerae.id.2238	FT4	0.00443677	21.1107
rs2031282	A	G	0.120412	0.0041	0.0095	0.0270263	5.86463e-06	0.6695	4739	phylum.Lentisphaerae.id.2238	FT4	0.00417123	19.8419
rs2825714	A	G	-0.138226	0.0041	0.0105	0.0289096	1.49772e-06	0.698	4739	phylum.Lentisphaerae.id.2238	FT4	0.00480087	22.8514
rs60995569	T	G	-0.16062	0.0061	0.0129	0.0336806	9.19393e-06	0.6386	4737	phylum.Lentisphaerae.id.2238	FT4	0.00477812	22.733
rs62570196	C	T	-0.217203	0.0009	0.0134	0.0439621	9.64474e-07	0.944	3716	phylum.Lentisphaerae.id.2238	FT4	0.00652613	24.3973
rs72640280	A	G	0.220185	0.0113	0.0148	0.0485947	5.19196e-06	0.4425	3820	phylum.Lentisphaerae.id.2238	FT4	0.00534573	20.5197
rs77599476	A	G	0.229981	-0.0193	0.0158	0.0479918	1.90263e-06	0.2218	3726	phylum.Lentisphaerae.id.2238	FT4	0.00612548	22.9519
rs112334273	G	A	0.0627459	0.0043	0.0086	0.0127415	9.26452e-07	0.6213	18217	phylum.Firmicutes.id.1672	FT4	0.00132945	24.2482
rs2009919	T	C	0.0536457	-0.0017	0.0084	0.0106294	4.94716e-07	0.8375	17859	phylum.Firmicutes.id.1672	FT4	0.00142421	25.4683
rs2273429	A	G	-0.0702112	-0.0031	0.0102	0.0153063	9.26239e-06	0.7639	18337	phylum.Firmicutes.id.1672	FT4	0.00114616	21.039
rs2332027	G	A	-0.0482656	0.0083	0.0072	0.0104823	4.04546e-06	0.2464	18340	phylum.Firmicutes.id.1672	FT4	0.00115468	21.199
rs2547978	A	G	0.0465802	0.0025	0.0067	0.0105075	8.56845e-06	0.7127	18338	phylum.Firmicutes.id.1672	FT4	0.00107051	19.6498
rs3792064	G	A	0.0897349	-0.0054	0.0119	0.0182532	6.75498e-07	0.6543	17812	phylum.Firmicutes.id.1672	FT4	0.00135501	24.1655
rs3852931	C	T	-0.0482086	-0.0029	0.0077	0.0105	4.52594e-06	0.7043	18260	phylum.Firmicutes.id.1672	FT4	0.00115311	21.0778
rs4750583	A	G	0.0616007	-0.0171	0.0092	0.0137936	5.78565e-06	0.06424	16934	phylum.Firmicutes.id.1672	FT4	0.00117637	19.9418
rs56199908	T	C	-0.186194	0.0005	0.0164	0.041051	8.66656e-06	0.9752	5618	phylum.Firmicutes.id.1672	FT4	0.00364851	20.565
rs6814436	T	C	0.0680205	0.0102	0.0095	0.0150844	6.80463e-06	0.2857	18336	phylum.Firmicutes.id.1672	FT4	0.00110774	20.3319
rs6815608	T	C	0.0935765	0.0198	0.0164	0.0210869	7.23859e-06	0.2294	16731	phylum.Firmicutes.id.1672	FT4	0.00117565	19.6905
rs7247191	T	C	-0.0713033	0.0018	0.0098	0.0157424	4.73101e-06	0.8518	18340	phylum.Firmicutes.id.1672	FT4	0.00111736	20.513
rs72738886	T	C	0.0864609	-0.0039	0.0122	0.0190398	7.67884e-06	0.749	16934	phylum.Firmicutes.id.1672	FT4	0.00121626	20.6189
rs72771021	C	T	-0.141357	0.0417	0.0188	0.0308303	5.12438e-06	0.02663	9068	phylum.Firmicutes.id.1672	FT4	0.00231291	21.0175
rs8085381	G	A	0.0647291	0.0055	0.0093	0.0146219	8.67253e-06	0.5536	18339	phylum.Firmicutes.id.1672	FT4	0.00106745	19.5948
rs10202904	T	G	-0.115986	-0.006	0.0069	0.0230271	6.1888e-07	0.3811	3861	phylum.Euryarchaeota.id.55	FT4	0.0065281	25.3575
rs11022995	G	A	-0.10373	-0.0143	0.0067	0.0228889	7.73001e-06	0.03434	3864	phylum.Euryarchaeota.id.55	FT4	0.00528711	20.5273
rs34928225	T	C	0.19977	0.0158	0.014	0.0425421	4.33093e-06	0.2576	3483	phylum.Euryarchaeota.id.55	FT4	0.0062911	22.038
rs45498998	G	A	-0.131882	-0.0021	0.0087	0.029229	5.32453e-06	0.8099	3850	phylum.Euryarchaeota.id.55	FT4	0.00526011	20.3479
rs56131665	G	A	0.176759	0.0021	0.0111	0.0385787	5.30389e-06	0.8485	3736	phylum.Euryarchaeota.id.55	FT4	0.00558764	20.9815
rs6064552	T	C	-0.123612	0.0084	0.0081	0.0275749	9.3378e-06	0.299	3775	phylum.Euryarchaeota.id.55	FT4	0.00529503	20.0845
rs6508769	T	C	0.150529	-0.0089	0.0097	0.0337091	8.12354e-06	0.3575	3483	phylum.Euryarchaeota.id.55	FT4	0.00569261	19.9294
rs7015093	G	A	-0.118111	-0.0207	0.0078	0.0264389	7.1987e-06	0.007984	3855	phylum.Euryarchaeota.id.55	FT4	0.00515023	19.9466
rs76029318	T	C	0.214866	-0.0032	0.0125	0.0438442	1.04622e-06	0.7967	3660	phylum.Euryarchaeota.id.55	FT4	0.00651915	24.0036
rs7635189	G	A	0.119983	0.001	0.0081	0.0259356	4.635e-06	0.9036	3483	phylum.Euryarchaeota.id.55	FT4	0.0061071	21.3895
rs77658038	A	C	-0.160157	0.0161	0.0103	0.0340856	4.7542e-06	0.1193	3810	phylum.Euryarchaeota.id.55	FT4	0.00576121	22.0658
rs894996	C	A	0.203577	0.0001	0.0123	0.0440033	5.11931e-06	0.991	3746	phylum.Euryarchaeota.id.55	FT4	0.00568124	21.3921
rs12555298	G	A	0.0974327	0.0027	0.0091	0.0219351	8.08628e-06	0.7626	7096	phylum.Cyanobacteria.id.1500	FT4	0.00277274	19.7245
rs2585223	T	C	0.111364	0.0016	0.0098	0.0247743	8.85734e-06	0.8686	6911	phylum.Cyanobacteria.id.1500	FT4	0.00291528	20.2006
rs584122	C	T	-0.151774	-0.0143	0.0126	0.0326827	4.22775e-06	0.2588	6922	phylum.Cyanobacteria.id.1500	FT4	0.00310581	21.5592
rs7148504	G	T	0.0800404	0.0006	0.0068	0.0176621	6.62391e-06	0.927	7118	phylum.Cyanobacteria.id.1500	FT4	0.0028769	20.5311
rs76531781	T	C	-0.231868	-0.0159	0.0152	0.0493393	2.87336e-06	0.2965	3658	phylum.Cyanobacteria.id.1500	FT4	0.00600119	22.0728
rs789068	G	A	-0.111385	0.0082	0.0084	0.0212922	1.57171e-07	0.3287	7110	phylum.Cyanobacteria.id.1500	FT4	0.0038342	27.3584
rs9864379	T	C	-0.138933	-0.0066	0.0104	0.0268045	2.03334e-07	0.5247	6922	phylum.Cyanobacteria.id.1500	FT4	0.0038662	26.8579
rs111845179	T	C	0.104177	0.0155	0.0134	0.0213837	6.47186e-07	0.2471	16394	phylum.Bacteroidetes.id.905	FT4	0.00144565	23.7314
rs17343978	A	C	-0.0556041	0.0008	0.0074	0.0120272	7.2247e-06	0.9122	18335	phylum.Bacteroidetes.id.905	FT4	0.00116438	21.3715
rs2032750	T	C	-0.0510857	-0.0069	0.0071	0.0106804	1.70835e-06	0.3336	17854	phylum.Bacteroidetes.id.905	FT4	0.00127976	22.8756
rs62531359	T	G	0.0657788	0.008	0.0096	0.0149886	8.42316e-06	0.4041	18321	phylum.Bacteroidetes.id.905	FT4	0.00105013	19.2576
rs62575403	C	T	0.145424	0.0299	0.0168	0.0311079	2.95953e-06	0.07572	9669	phylum.Bacteroidetes.id.905	FT4	0.00225512	21.8495
rs6586324	T	C	0.0477792	-0.0106	0.0065	0.0105437	7.36878e-06	0.1017	18332	phylum.Bacteroidetes.id.905	FT4	0.00111891	20.5327
rs72706335	T	C	-0.223193	0.0091	0.0153	0.0493382	7.13111e-06	0.5522	3820	phylum.Bacteroidetes.id.905	FT4	0.00532857	20.4535
rs73512608	G	A	-0.123117	0.003	0.0143	0.0236743	2.53891e-07	0.8345	11350	phylum.Bacteroidetes.id.905	FT4	0.00237713	27.0399
rs73846128	A	G	-0.0664262	0.0129	0.0085	0.0133481	4.78296e-07	0.1294	18335	phylum.Bacteroidetes.id.905	FT4	0.00134887	24.7622
rs73975615	G	A	-0.207163	-0.0361	0.0406	0.0442629	1.20411e-06	0.3742	3350	phylum.Bacteroidetes.id.905	FT4	0.00649634	21.892
rs7999780	G	A	0.0543635	0.0083	0.0092	0.0124067	9.46652e-06	0.3654	18325	phylum.Bacteroidetes.id.905	FT4	0.00104666	19.198
rs929878	C	T	-0.0540001	-0.0033	0.0073	0.0121526	6.5112e-06	0.6535	18335	phylum.Bacteroidetes.id.905	FT4	0.00107573	19.7426
rs11766971	T	C	0.0476376	-0.0046	0.0067	0.010646	9.39927e-06	0.4885	17987	phylum.Actinobacteria.id.400	FT4	0.00111194	20.0205
rs12528285	C	T	0.0809469	-0.0026	0.0113	0.0180784	5.68792e-06	0.8209	17990	phylum.Actinobacteria.id.400	FT4	0.00111318	20.0462
rs13192624	T	C	-0.0522862	0.0012	0.0078	0.0117742	9.32576e-06	0.8811	17985	phylum.Actinobacteria.id.400	FT4	0.00109527	19.7179
rs1397793	G	A	-0.0521387	0.0131	0.0072	0.0111587	3.73769e-06	0.06814	17782	phylum.Actinobacteria.id.400	FT4	0.00122624	21.8294
rs4429415	C	T	0.0581908	-0.0004	0.0072	0.0111343	2.05146e-07	0.9542	17990	phylum.Actinobacteria.id.400	FT4	0.00151597	27.3106
rs55888705	A	G	0.0534221	0.0064	0.007	0.0109975	1.31242e-06	0.3647	17988	phylum.Actinobacteria.id.400	FT4	0.00131009	23.5941
rs6496870	T	C	0.0510777	-0.0133	0.0069	0.0113809	4.61743e-06	0.05261	17990	phylum.Actinobacteria.id.400	FT4	0.00111839	20.1402
rs6743026	T	C	0.0589446	-0.0031	0.009	0.0134622	9.8833e-06	0.7337	17875	phylum.Actinobacteria.id.400	FT4	0.00107138	19.1692
rs74037001	G	A	-0.0819391	-0.0041	0.0102	0.0165334	6.7124e-07	0.6904	17179	phylum.Actinobacteria.id.400	FT4	0.00142772	24.5589
rs75211493	G	A	0.0840786	-0.0184	0.0139	0.0184739	9.27186e-06	0.1838	16605	phylum.Actinobacteria.id.400	FT4	0.00124588	20.7111
rs7570971	A	C	0.086653	-0.0152	0.008	0.0113623	1.41347e-14	0.0558	17782	phylum.Actinobacteria.id.400	FT4	0.00326015	58.155
rs80124826	T	C	-0.124191	-0.0097	0.0168	0.0278566	8.75422e-06	0.5614	11999	phylum.Actinobacteria.id.400	FT4	0.00165372	19.8725
rs8047955	A	G	0.0521115	0.0117	0.0072	0.0111192	2.66203e-06	0.1035	17980	phylum.Actinobacteria.id.400	FT4	0.00122011	21.9619
rs857444	C	T	0.0507315	-0.0031	0.0069	0.0109885	3.80349e-06	0.6556	17988	phylum.Actinobacteria.id.400	FT4	0.00118355	21.3125
rs9833771	T	C	0.0490077	-0.0083	0.0071	0.0106564	4.0744e-06	0.2391	17990	phylum.Actinobacteria.id.400	FT4	0.00117426	21.1474
rs1002941	G	A	0.105025	0.0111	0.0073	0.0233484	8.14836e-06	0.1283	4734	order.Victivallales.id.2254	FT4	0.00425588	20.2249
rs11770843	C	T	0.109431	0.0144	0.0073	0.0234879	1.90729e-06	0.04677	4705	order.Victivallales.id.2254	FT4	0.00459233	21.6974
rs17114848	G	A	0.152377	-0.0035	0.0118	0.0324332	4.05865e-06	0.7674	4734	order.Victivallales.id.2254	FT4	0.004641	22.0636
rs2031282	A	G	0.122369	0.0041	0.0095	0.0270329	4.3826e-06	0.6695	4734	order.Victivallales.id.2254	FT4	0.00430972	20.4819
rs2825714	A	G	-0.13741	0.0041	0.0105	0.0289246	1.72211e-06	0.698	4734	order.Victivallales.id.2254	FT4	0.00474471	22.559
rs62570196	C	T	-0.21635	0.0009	0.0134	0.0439866	1.07926e-06	0.944	3712	order.Victivallales.id.2254	FT4	0.00647509	24.1792
rs72640280	A	G	0.220207	0.0113	0.0148	0.0486196	5.18035e-06	0.4425	3816	order.Victivallales.id.2254	FT4	0.0053469	20.5027
rs77599476	A	G	0.230292	-0.0193	0.0158	0.0480168	1.86133e-06	0.2218	3722	order.Victivallales.id.2254	FT4	0.00614212	22.9899
rs117107102	A	G	0.204683	0.0151	0.0177	0.0431573	2.91821e-06	0.3944	4975	order.Verrucomicrobiales.id.4030	FT4	0.00450094	22.4844
rs11729256	T	C	0.0749798	-0.0159	0.0078	0.0150177	6.7309e-07	0.04195	11861	order.Verrucomicrobiales.id.4030	FT4	0.00209725	24.9235
rs12908520	G	A	0.0618926	-0.005	0.0065	0.0130946	2.17163e-06	0.4435	11863	order.Verrucomicrobiales.id.4030	FT4	0.00187966	22.3366
rs2602429	C	T	0.0746844	0.0003	0.0086	0.0156194	2.58297e-06	0.9712	11690	order.Verrucomicrobiales.id.4030	FT4	0.00195194	22.8589
rs4242783	G	A	0.0689292	0.0039	0.0077	0.0147693	2.63612e-06	0.6111	11690	order.Verrucomicrobiales.id.4030	FT4	0.00185979	21.7777
rs4936098	A	G	0.0648843	-0.0024	0.0072	0.0135928	1.12221e-06	0.7428	11858	order.Verrucomicrobiales.id.4030	FT4	0.00191785	22.7817
rs61779207	G	A	-0.0758309	0.01	0.0084	0.0167762	6.72285e-06	0.2331	11591	order.Verrucomicrobiales.id.4030	FT4	0.00175963	20.4283
rs74542928	T	C	0.112164	-0.0143	0.0117	0.0236422	1.63222e-06	0.2224	11216	order.Verrucomicrobiales.id.4030	FT4	0.00200272	22.5036
rs9349825	A	G	-0.0704036	0.003	0.0074	0.0147128	2.53687e-06	0.6854	11858	order.Verrucomicrobiales.id.4030	FT4	0.0019273	22.8942
rs941682	G	A	-0.0631436	-0.004	0.0072	0.0143767	9.61003e-06	0.5757	11809	order.Verrucomicrobiales.id.4030	FT4	0.00163086	19.287
rs1135612	G	A	0.0529785	-0.0002	0.0076	0.0119177	9.26307e-06	0.9809	18164	order.Selenomonadales.id.2165	FT4	0.00108676	19.7592
rs13086907	G	A	0.0625312	0.0051	0.0084	0.0131735	1.95488e-06	0.5407	18163	order.Selenomonadales.id.2165	FT4	0.00123898	22.5291
rs1643968	T	C	-0.0565284	0.0039	0.0072	0.0112298	4.14596e-07	0.5851	18170	order.Selenomonadales.id.2165	FT4	0.00139261	25.3362
rs1649999	A	G	0.0748989	0.0278	0.0112	0.0166458	7.5812e-06	0.01335	18036	order.Selenomonadales.id.2165	FT4	0.00112128	20.2439
rs2834062	A	G	0.0489057	-0.0105	0.0071	0.0108842	8.4392e-06	0.1372	18171	order.Selenomonadales.id.2165	FT4	0.00110986	20.1874
rs4463806	T	C	-0.0543966	-0.0045	0.0082	0.0129365	7.80662e-06	0.5799	18160	order.Selenomonadales.id.2165	FT4	0.000972681	17.6791
rs4722181	T	G	0.0501306	0.0015	0.0066	0.0105798	2.00112e-06	0.8199	18163	order.Selenomonadales.id.2165	FT4	0.0012346	22.4493
rs60274479	T	C	-0.0659623	0.0119	0.0092	0.0134137	1.1623e-06	0.1974	17610	order.Selenomonadales.id.2165	FT4	0.00137132	24.1794
rs61249479	A	C	0.0777075	0.0135	0.0115	0.0168628	2.95471e-06	0.2416	18165	order.Selenomonadales.id.2165	FT4	0.00116768	21.2333
rs71405394	G	A	-0.114178	0.0182	0.0151	0.02405	2.16631e-06	0.2279	13861	order.Selenomonadales.id.2165	FT4	0.00162343	22.5358
rs73232831	G	A	-0.151829	0.0124	0.016	0.0314932	1.87452e-06	0.4384	9382	order.Selenomonadales.id.2165	FT4	0.00247119	23.2372
rs9423647	G	A	0.047817	0.0063	0.0065	0.0105282	6.06114e-06	0.3332	18164	order.Selenomonadales.id.2165	FT4	0.00113436	20.6257
rs1035406	G	A	-0.114725	-0.0049	0.011	0.0247994	4.07163e-06	0.6536	8585	order.Rhodospirillales.id.2667	FT4	0.00248664	21.396
rs11591293	G	T	0.0722755	-0.0033	0.0067	0.0158186	4.68529e-06	0.6192	8602	order.Rhodospirillales.id.2667	FT4	0.002421	20.8711
rs11630875	T	C	0.0945198	0.0156	0.0087	0.0202139	3.70379e-06	0.07207	8595	order.Rhodospirillales.id.2667	FT4	0.00253745	21.8598
rs1549633	A	C	0.0996735	0.0033	0.0094	0.0216667	3.88024e-06	0.7244	8112	order.Rhodospirillales.id.2667	FT4	0.00260205	21.1577
rs3730086	A	G	0.0800354	0.0086	0.0076	0.0178737	7.98252e-06	0.2527	8602	order.Rhodospirillales.id.2667	FT4	0.00232554	20.0462
rs3754624	C	T	0.094128	0.0081	0.0089	0.0198389	2.68367e-06	0.3658	8598	order.Rhodospirillales.id.2667	FT4	0.00261137	22.5061
rs4278423	T	C	0.105215	0.0109	0.0099	0.0233778	3.9804e-06	0.2689	8603	order.Rhodospirillales.id.2667	FT4	0.00234897	20.2511
rs55876211	C	T	-0.0865002	0.0076	0.0086	0.0195197	7.87313e-06	0.3788	8596	order.Rhodospirillales.id.2667	FT4	0.0022793	19.6331
rs61933850	G	A	0.164663	0.0315	0.0174	0.0360285	6.99876e-06	0.07026	6846	order.Rhodospirillales.id.2667	FT4	0.00304184	20.8819
rs7001029	C	T	0.120726	-0.0061	0.0108	0.0260989	2.83071e-06	0.5711	8063	order.Rhodospirillales.id.2667	FT4	0.00264671	21.3917
rs76784716	A	G	0.136039	-0.0037	0.0126	0.0284399	1.31382e-06	0.7678	8600	order.Rhodospirillales.id.2667	FT4	0.0026535	22.8755
rs77304857	C	A	-0.0997433	0.0068	0.0098	0.0222165	6.02031e-06	0.4854	8602	order.Rhodospirillales.id.2667	FT4	0.00233775	20.1518
rs9813022	A	G	-0.0830795	0.0143	0.007	0.0162642	3.07213e-07	0.04193	8600	order.Rhodospirillales.id.2667	FT4	0.00302489	26.087
rs10965428	C	A	-0.119902	-0.0048	0.0112	0.0258219	4.29151e-06	0.6674	8873	order.Pasteurellales.id.3688	FT4	0.00242411	21.5565
rs111582866	G	A	-0.113957	0.0063	0.0117	0.0256403	7.06627e-06	0.5881	8616	order.Pasteurellales.id.3688	FT4	0.00228738	19.7486
rs12050685	A	G	-0.0670948	-0.0008	0.0067	0.015239	9.18513e-06	0.9053	9411	order.Pasteurellales.id.3688	FT4	0.00205559	19.3809
rs16970009	A	G	0.187381	-0.0017	0.0156	0.0429572	7.31531e-06	0.9154	4703	order.Pasteurellales.id.3688	FT4	0.00402952	19.0194
rs35510	A	G	0.122729	-0.0173	0.0129	0.0264958	4.01576e-06	0.1799	8671	order.Pasteurellales.id.3688	FT4	0.00246831	21.4507
rs4822728	T	C	0.0685479	0.0025	0.007	0.0149032	4.71847e-06	0.7158	9412	order.Pasteurellales.id.3688	FT4	0.00224269	21.1512
rs6972479	A	G	-0.0781862	0.0054	0.0078	0.0175366	7.74817e-06	0.4888	8616	order.Pasteurellales.id.3688	FT4	0.00230179	19.8733
rs72756943	G	A	0.13988	-0.0106	0.0147	0.0303029	3.35218e-06	0.4693	8020	order.Pasteurellales.id.3688	FT4	0.00264982	21.3027
rs73139353	A	C	-0.222573	-0.0022	0.0159	0.0484634	8.71314e-06	0.8897	4047	order.Pasteurellales.id.3688	FT4	0.00518471	21.0815
rs76022354	C	T	0.24289	0.0104	0.0168	0.0500406	1.82858e-06	0.5365	3692	order.Pasteurellales.id.3688	FT4	0.00634087	23.5471
rs78909003	T	C	-0.241159	-0.0013	0.0165	0.0498372	2.04893e-06	0.9384	3638	order.Pasteurellales.id.3688	FT4	0.00639517	23.4025
rs9382510	C	T	-0.0881865	-0.0066	0.0078	0.0169965	2.476e-07	0.3978	9410	order.Pasteurellales.id.3688	FT4	0.0028527	26.915
rs9895850	T	C	-0.176406	0.0066	0.0155	0.041017	9.08251e-06	0.67	4737	order.Pasteurellales.id.3688	FT4	0.00388961	18.4892
rs9938097	T	C	-0.0710386	0.0033	0.0073	0.0158024	8.22604e-06	0.6489	9402	order.Pasteurellales.id.3688	FT4	0.00214481	20.2045
rs11251024	G	A	0.104201	-0.0091	0.007	0.0206737	6.62801e-07	0.1937	5107	order.NB1n.id.3953	FT4	0.00494979	25.3944
rs11606187	A	G	-0.154539	-0.0061	0.0108	0.0326288	3.30586e-06	0.573	5102	order.NB1n.id.3953	FT4	0.00437753	22.4236
rs13385922	T	C	0.0929494	-0.0098	0.0069	0.0201348	3.96829e-06	0.1563	5106	order.NB1n.id.3953	FT4	0.00415631	21.3024
rs166849	G	A	0.0911053	-0.0046	0.0069	0.0202239	7.73898e-06	0.4994	5107	order.NB1n.id.3953	FT4	0.00395793	20.2855
rs2172426	C	T	-0.10212	0.0061	0.0067	0.0198947	3.17425e-07	0.3637	5099	order.NB1n.id.3953	FT4	0.00514072	26.3376
rs267959	A	G	0.0988612	-0.0007	0.007	0.0209676	2.61993e-06	0.9236	5107	order.NB1n.id.3953	FT4	0.00433415	22.2221
rs4383094	T	C	0.149188	-0.0043	0.0109	0.0320662	4.28134e-06	0.6908	5091	order.NB1n.id.3953	FT4	0.00423377	21.6372
rs60583455	T	C	0.108934	0.0018	0.0093	0.021177	2.59578e-07	0.844	4773	order.NB1n.id.3953	FT4	0.0055132	26.4493
rs60775321	T	C	-0.0962425	0.0011	0.0072	0.0213842	7.1046e-06	0.88	5101	order.NB1n.id.3953	FT4	0.00395524	20.2479
rs72671304	T	C	0.172322	0.0043	0.0123	0.0370028	3.79578e-06	0.7286	4887	order.NB1n.id.3953	FT4	0.0044182	21.6787
rs7911787	G	T	-0.223071	-0.0159	0.0149	0.0470232	3.38824e-06	0.2858	3879	order.NB1n.id.3953	FT4	0.00576803	22.4924
rs8126061	T	C	-0.159135	-0.0039	0.0119	0.0351904	7.36334e-06	0.7453	5089	order.NB1n.id.3953	FT4	0.0040023	20.4415
rs9542068	T	C	0.0990709	0.0043	0.0072	0.0218149	6.52339e-06	0.5508	5107	order.NB1n.id.3953	FT4	0.00402224	20.6165
rs11779863	G	A	-0.0772768	-0.0063	0.008	0.0172171	6.68845e-06	0.4319	10353	order.MollicutesRF9.id.11579	FT4	0.00194209	20.1417
rs12566890	T	G	-0.103134	-0.0056	0.0131	0.0241775	8.11201e-06	0.6711	10339	order.MollicutesRF9.id.11579	FT4	0.00175686	18.1926
rs13100746	C	T	0.0638979	-0.0018	0.0066	0.0142685	7.28846e-06	0.7909	10359	order.MollicutesRF9.id.11579	FT4	0.00193222	20.0507
rs17235252	T	C	-0.122002	-0.0022	0.0115	0.0255463	2.15879e-06	0.8471	9531	order.MollicutesRF9.id.11579	FT4	0.00238728	22.8028
rs3932485	C	T	0.0626209	0.0124	0.0066	0.0141623	9.92857e-06	0.06059	10359	order.MollicutesRF9.id.11579	FT4	0.00188379	19.5472
rs515984	T	C	-0.0875451	-0.0039	0.0088	0.0190685	6.61366e-06	0.6591	10359	order.MollicutesRF9.id.11579	FT4	0.00203062	21.0739
rs638542	G	A	-0.070592	-0.0037	0.0074	0.0157049	5.17285e-06	0.6176	9970	order.MollicutesRF9.id.11579	FT4	0.00202239	20.2001
rs74603314	T	C	0.230767	-0.0123	0.016	0.0489701	2.27641e-06	0.4407	4033	order.MollicutesRF9.id.11579	FT4	0.00547612	22.1958
rs76373661	G	A	0.0908218	-0.01	0.0096	0.0202986	5.15941e-06	0.3004	10359	order.MollicutesRF9.id.11579	FT4	0.00192882	20.0154
rs7706512	G	A	0.0657351	0.0007	0.0068	0.0138979	2.27207e-06	0.9216	10359	order.MollicutesRF9.id.11579	FT4	0.00215496	22.3672
rs7801843	A	G	-0.0869495	0.0064	0.0093	0.0194509	9.46882e-06	0.4953	10359	order.MollicutesRF9.id.11579	FT4	0.0019253	19.9788
rs7853673	G	A	-0.0624389	-0.011	0.0067	0.0139833	6.7325e-06	0.09743	10359	order.MollicutesRF9.id.11579	FT4	0.00192106	19.9348
rs949341	G	A	0.0656602	-0.0154	0.0069	0.0147216	7.73282e-06	0.02547	10355	order.MollicutesRF9.id.11579	FT4	0.00191738	19.8888
rs10202904	T	G	-0.121754	-0.006	0.0069	0.0235357	3.0143e-07	0.3811	3695	order.Methanobacteriales.id.120	FT4	0.00719054	26.747
rs10424197	G	A	-0.111274	-0.0024	0.0076	0.0247517	9.27887e-06	0.7546	3698	order.Methanobacteriales.id.120	FT4	0.00543558	20.1997
rs4257531	G	A	0.164498	-0.0138	0.0108	0.0364959	7.44344e-06	0.1994	3162	order.Methanobacteriales.id.120	FT4	0.00638397	20.303
rs56131665	G	A	0.178661	0.0021	0.0111	0.039298	6.17992e-06	0.8485	3572	order.Methanobacteriales.id.120	FT4	0.00575311	20.6574
rs6508769	T	C	0.153519	-0.0089	0.0097	0.0344519	8.22529e-06	0.3575	3319	order.Methanobacteriales.id.120	FT4	0.00594705	19.8444
rs6776814	T	C	-0.199566	-0.0077	0.011	0.0411825	1.63062e-06	0.4806	3385	order.Methanobacteriales.id.120	FT4	0.00688948	23.4688
rs73068003	G	T	-0.15814	-0.007	0.01	0.0351803	8.44583e-06	0.4864	3692	order.Methanobacteriales.id.120	FT4	0.0054432	20.1953
rs73457410	A	G	0.21534	-0.005	0.0123	0.0436695	1.40855e-06	0.6867	3498	order.Methanobacteriales.id.120	FT4	0.0069034	24.3021
rs75208022	C	T	-0.227245	-0.0019	0.0124	0.048763	5.92103e-06	0.8759	3203	order.Methanobacteriales.id.120	FT4	0.00673465	21.7038
rs894996	C	A	0.216999	0.0001	0.0123	0.0449076	1.87557e-06	0.991	3582	order.Methanobacteriales.id.120	FT4	0.00647634	23.3364
rs11110282	A	G	-0.10239	0.0164	0.0128	0.0217849	3.95665e-06	0.2015	15956	order.Lactobacillales.id.1800	FT4	0.00138254	22.0875
rs11627423	C	A	0.0499263	-0.0012	0.0067	0.0109744	5.08753e-06	0.8532	17275	order.Lactobacillales.id.1800	FT4	0.00119663	20.6941
rs11730038	G	A	-0.0605384	-0.0096	0.0081	0.0129052	5.09746e-06	0.2385	17295	order.Lactobacillales.id.1800	FT4	0.00127074	22.0029
rs1595463	C	A	0.0479749	0.0102	0.0072	0.0108801	7.44354e-06	0.1553	17276	order.Lactobacillales.id.1800	FT4	0.00112416	19.4406
rs2370083	G	T	-0.08054	-0.002	0.0121	0.0180992	8.33495e-06	0.8686	17183	order.Lactobacillales.id.1800	FT4	0.00115108	19.7995
rs2952251	A	G	-0.0629317	-0.0031	0.0075	0.0124177	3.36461e-07	0.6738	17278	order.Lactobacillales.id.1800	FT4	0.00148428	25.6805
rs35344081	G	A	0.0642442	-0.0036	0.0079	0.0127358	4.16066e-07	0.6443	17292	order.Lactobacillales.id.1800	FT4	0.00146936	25.4427
rs4028634	T	C	0.0532915	0.0072	0.0068	0.01101	1.34806e-06	0.2917	17295	order.Lactobacillales.id.1800	FT4	0.0013528	23.4257
rs57872228	C	T	-0.0688415	0.0018	0.0092	0.0146994	2.58252e-06	0.8465	17293	order.Lactobacillales.id.1800	FT4	0.00126672	21.9306
rs74663707	C	T	0.0982594	0.0184	0.0167	0.0224613	8.39558e-06	0.2702	15695	order.Lactobacillales.id.1800	FT4	0.00121784	19.1348
rs77558518	A	G	-0.106466	-0.011	0.0156	0.0223484	1.67435e-06	0.4834	15758	order.Lactobacillales.id.1800	FT4	0.00143815	22.6921
rs78938557	T	C	0.10553	0.0079	0.0148	0.0233581	2.31087e-06	0.5909	15152	order.Lactobacillales.id.1800	FT4	0.00134531	20.409
rs9581006	C	T	0.22583	0.018	0.0193	0.0469228	1.76596e-06	0.3494	4224	order.Lactobacillales.id.1800	FT4	0.00545374	23.152
rs1074800	A	G	0.0492438	0.0002	0.0072	0.010887	6.14583e-06	0.978	17789	order.Erysipelotrichales.id.2148	FT4	0.00114877	20.4567
rs10781552	C	T	-0.0552212	0.0099	0.0072	0.0116074	2.33114e-06	0.1719	17789	order.Erysipelotrichales.id.2148	FT4	0.00127068	22.6304
rs17530232	A	G	0.10305	0.043	0.0195	0.0224648	2.79123e-06	0.02718	16622	order.Erysipelotrichales.id.2148	FT4	0.00126433	21.0397
rs1884466	C	T	-0.0475363	-0.0023	0.0068	0.0106939	9.52701e-06	0.7355	18205	order.Erysipelotrichales.id.2148	FT4	0.00108423	19.7576
rs2300774	G	A	0.0524152	0.0102	0.0066	0.0106784	8.95466e-07	0.1236	18216	order.Erysipelotrichales.id.2148	FT4	0.00132092	24.0911
rs290833	T	G	-0.0497374	0.0058	0.0072	0.0111376	8.029e-06	0.4183	17789	order.Erysipelotrichales.id.2148	FT4	0.0011198	19.9402
rs35161940	T	C	-0.0806041	-0.0058	0.0102	0.0167641	1.8451e-06	0.5684	18213	order.Erysipelotrichales.id.2148	FT4	0.00126771	23.1157
rs4078432	C	T	-0.0608929	0.0015	0.0088	0.0133764	4.23104e-06	0.8635	17789	order.Erysipelotrichales.id.2148	FT4	0.00116359	20.7209
rs56970041	T	G	0.0724144	0.015	0.0101	0.0164471	5.40344e-06	0.1378	18217	order.Erysipelotrichales.id.2148	FT4	0.001063	19.3832
rs62504403	C	T	0.0681159	-0.0258	0.0084	0.0127883	1.12265e-07	0.002074	16981	order.Erysipelotrichales.id.2148	FT4	0.00166794	28.3673
rs7234058	T	C	-0.0945759	0.0125	0.0122	0.0194091	9.12341e-07	0.3037	16874	order.Erysipelotrichales.id.2148	FT4	0.00140515	23.741
rs7826267	T	G	-0.0839071	0.0138	0.0153	0.0199131	9.28449e-06	0.3666	17586	order.Erysipelotrichales.id.2148	FT4	0.00100859	17.753
rs8003149	C	T	0.0538798	0.005	0.0076	0.0116888	4.08475e-06	0.5131	18213	order.Erysipelotrichales.id.2148	FT4	0.00116526	21.2454
rs11026530	T	C	0.0822408	-0.0159	0.0098	0.0186379	9.42684e-06	0.1066	13485	order.Enterobacteriales.id.3468	FT4	0.00144179	19.4678
rs2374342	C	A	0.0582927	0.0111	0.0071	0.0126195	4.51618e-06	0.1167	13577	order.Enterobacteriales.id.3468	FT4	0.00156913	21.3345
rs35673018	G	A	0.0899642	0.0069	0.0133	0.0202934	7.63109e-06	0.6049	13326	order.Enterobacteriales.id.3468	FT4	0.00147261	19.65
rs504442	T	G	0.084159	-0.0093	0.0103	0.0189479	5.17092e-06	0.3663	13578	order.Enterobacteriales.id.3468	FT4	0.00145082	19.7249
rs62210023	A	G	0.0606754	0.0014	0.0071	0.0130125	3.13163e-06	0.8456	13515	order.Enterobacteriales.id.3468	FT4	0.00160616	21.739
rs78143293	A	G	-0.0848521	0.0033	0.0088	0.0170415	1.19564e-06	0.7126	13572	order.Enterobacteriales.id.3468	FT4	0.00182336	24.7882
rs79757635	C	A	0.0758597	0.0057	0.0101	0.0171286	9.31857e-06	0.5755	13419	order.Enterobacteriales.id.3468	FT4	0.00145957	19.6117
rs112381107	C	T	0.21009	0.0147	0.0155	0.0456974	3.21653e-06	0.3419	4455	order.Desulfovibrionales.id.3156	FT4	0.004722	21.1268
rs11599763	T	C	-0.0554862	0.0048	0.0069	0.0117486	2.60698e-06	0.4812	15144	order.Desulfovibrionales.id.3156	FT4	0.00147067	22.3017
rs17791387	A	G	-0.0727501	-0.0059	0.0086	0.0154369	2.25294e-06	0.495	15047	order.Desulfovibrionales.id.3156	FT4	0.00147385	22.2068
rs186073	T	C	0.0529219	-0.001	0.0068	0.0118542	8.74432e-06	0.8831	14841	order.Desulfovibrionales.id.3156	FT4	0.00134117	19.9283
rs2692012	A	G	0.112244	0.0005	0.0142	0.0253553	2.27021e-06	0.9745	13082	order.Desulfovibrionales.id.3156	FT4	0.00149577	19.5939
rs2838334	G	A	0.0569024	-0.0116	0.0071	0.0124223	4.16791e-06	0.1011	15144	order.Desulfovibrionales.id.3156	FT4	0.00138361	20.9796
rs3935584	C	T	-0.0524466	0	0.0068	0.0115749	7.1974e-06	0.9983	15142	order.Desulfovibrionales.id.3156	FT4	0.00135404	20.5279
rs4506934	C	T	-0.0953383	-0.0078	0.012	0.0201367	2.42998e-06	0.5141	15037	order.Desulfovibrionales.id.3156	FT4	0.00148851	22.413
rs6058181	C	T	0.0836765	0.0167	0.0095	0.0166098	2.5277e-07	0.07794	15076	order.Desulfovibrionales.id.3156	FT4	0.00168059	25.3759
rs62020470	A	G	-0.0573633	0.0038	0.0072	0.0129462	7.50981e-06	0.596	15144	order.Desulfovibrionales.id.3156	FT4	0.00129474	19.6303
rs72647048	T	C	-0.0772459	-0.0133	0.01	0.0170876	9.00294e-06	0.18	15144	order.Desulfovibrionales.id.3156	FT4	0.0013476	20.4328
rs9928243	C	A	-0.0544713	-0.0032	0.0066	0.0117811	3.96636e-06	0.6304	15143	order.Desulfovibrionales.id.3156	FT4	0.00140974	21.3751
rs11073596	T	G	0.0510212	-0.0009	0.0079	0.0114339	8.14449e-06	0.9113	17527	order.Coriobacteriales.id.810	FT4	0.00113478	19.9096
rs11250875	T	C	0.06075	-0.0065	0.008	0.0130939	4.82844e-06	0.4208	17690	order.Coriobacteriales.id.810	FT4	0.00121534	21.5232
rs11656361	A	C	0.0773006	0.0088	0.0142	0.017553	8.02017e-06	0.5346	16665	order.Coriobacteriales.id.810	FT4	0.0011624	19.3915
rs12974142	G	A	0.0789796	-0.0163	0.0116	0.0177205	8.51232e-06	0.161	17413	order.Coriobacteriales.id.810	FT4	0.00113949	19.8623
rs13307134	C	T	0.0565686	0.0139	0.0082	0.0126265	7.79931e-06	0.08857	17527	order.Coriobacteriales.id.810	FT4	0.00114388	20.0695
rs1397793	G	A	-0.0498855	0.0131	0.0072	0.0112446	9.77381e-06	0.06814	17527	order.Coriobacteriales.id.810	FT4	0.00112166	19.6792
rs1816223	A	G	-0.0586265	0.0076	0.0079	0.0129006	4.84114e-06	0.3331	17688	order.Coriobacteriales.id.810	FT4	0.00116623	20.65
rs240104	T	C	-0.0603429	-0.0016	0.008	0.0126849	1.51603e-06	0.8373	17577	order.Coriobacteriales.id.810	FT4	0.0012858	22.6271
rs2442778	G	A	-0.116408	-0.0035	0.0141	0.0258545	9.02703e-06	0.8051	13472	order.Coriobacteriales.id.810	FT4	0.00150249	20.2689
rs3025411	A	G	0.0926543	0.0019	0.0161	0.0209468	8.26912e-06	0.9052	15671	order.Coriobacteriales.id.810	FT4	0.00124698	19.5632
rs34739816	G	T	0.0965017	0.0104	0.0123	0.0207666	3.88358e-06	0.3982	16593	order.Coriobacteriales.id.810	FT4	0.00129972	21.5917
rs67561917	A	G	-0.0714367	-0.0028	0.0116	0.0154113	5.39129e-06	0.8061	17333	order.Coriobacteriales.id.810	FT4	0.00123808	21.4838
rs719099	A	G	0.0778402	-0.0017	0.0103	0.0155815	5.43317e-07	0.8714	17687	order.Coriobacteriales.id.810	FT4	0.00140904	24.954
rs8010111	G	A	-0.103377	0.0011	0.014	0.0229286	6.89624e-06	0.9379	15996	order.Coriobacteriales.id.810	FT4	0.00126919	20.3253
rs10774377	A	G	0.0523003	-0.0077	0.0074	0.0113859	3.80899e-06	0.2944	18330	order.Clostridiales.id.1863	FT4	0.00114977	21.0972
rs112334273	G	A	0.0639383	0.0043	0.0086	0.0127404	4.07257e-07	0.6213	18217	order.Clostridiales.id.1863	FT4	0.00138063	25.1829
rs13105690	T	C	-0.0527441	-0.0073	0.0079	0.011818	9.36806e-06	0.3579	18340	order.Clostridiales.id.1863	FT4	0.00108489	19.9164
rs13179700	T	C	0.0510953	-0.0023	0.0068	0.0109569	3.52111e-06	0.7319	18338	order.Clostridiales.id.1863	FT4	0.00118446	21.744
rs1842454	G	A	-0.0543676	-0.0028	0.0078	0.012734	9.91744e-06	0.7217	18340	order.Clostridiales.id.1863	FT4	0.000992932	18.2265
rs2273429	A	G	-0.0726191	-0.0031	0.0102	0.0153105	4.16871e-06	0.7639	18337	order.Clostridiales.id.1863	FT4	0.00122535	22.4944
rs290772	G	A	0.084254	0.0215	0.0129	0.0196297	9.99759e-06	0.09457	17129	order.Clostridiales.id.1863	FT4	0.00107437	18.4205
rs6442336	C	T	-0.0547729	-0.0018	0.008	0.0124169	9.62568e-06	0.8232	18333	order.Clostridiales.id.1863	FT4	0.00106025	19.456
rs6814436	T	C	0.0741858	0.0102	0.0095	0.0150814	9.06288e-07	0.2857	18336	order.Clostridiales.id.1863	FT4	0.0013179	24.1942
rs6815608	T	C	0.104089	0.0198	0.0164	0.0210883	3.71989e-07	0.2294	16731	order.Clostridiales.id.1863	FT4	0.00145403	24.3598
rs72738886	T	C	0.0865333	-0.0039	0.0122	0.0190392	8.41577e-06	0.749	16934	order.Clostridiales.id.1863	FT4	0.00121837	20.6546
rs72915163	T	C	-0.0580246	0.0034	0.0077	0.0120558	1.39104e-06	0.6639	18317	order.Clostridiales.id.1863	FT4	0.00126308	23.1626
rs76767978	G	A	0.0699806	0.007	0.0127	0.0156318	8.17561e-06	0.5811	18329	order.Clostridiales.id.1863	FT4	0.00109225	20.0395
rs1511453	A	G	0.0910999	-0.0091	0.0143	0.0199479	8.00097e-06	0.5252	17032	order.Burkholderiales.id.2874	FT4	0.00122305	20.854
rs1928341	A	G	0.0507782	0.0154	0.0066	0.0110587	4.51508e-06	0.02015	17096	order.Burkholderiales.id.2874	FT4	0.00123174	21.0812
rs2321387	G	A	-0.0508514	-0.0183	0.0066	0.0109588	3.25787e-06	0.005353	17095	order.Burkholderiales.id.2874	FT4	0.00125796	21.5294
rs2613606	C	T	-0.0499561	0.0055	0.0066	0.0109264	4.13357e-06	0.4037	17092	order.Burkholderiales.id.2874	FT4	0.00122152	20.9013
rs4033856	C	T	0.0833446	-0.0116	0.0104	0.0167489	5.66823e-07	0.262	15897	order.Burkholderiales.id.2874	FT4	0.00155521	24.7586
rs6087811	T	G	-0.101587	0.0031	0.0121	0.0198817	2.88374e-07	0.7957	16135	order.Burkholderiales.id.2874	FT4	0.00161546	26.1044
rs62191117	A	G	0.0679995	0.0122	0.0085	0.0132471	2.79099e-07	0.1488	16975	order.Burkholderiales.id.2874	FT4	0.00154985	26.3464
rs62395635	T	C	0.109911	0.0048	0.0133	0.0236375	2.90228e-06	0.7156	15062	order.Burkholderiales.id.2874	FT4	0.00143342	21.6183
rs75242906	C	T	-0.120974	-0.0202	0.0166	0.0281273	9.74519e-06	0.2238	10766	order.Burkholderiales.id.2874	FT4	0.00171527	18.4948
rs7638039	T	C	0.0580987	-0.002	0.008	0.012673	4.83593e-06	0.8003	17078	order.Burkholderiales.id.2874	FT4	0.00122914	21.0146
rs9964679	A	G	0.052509	-0.0091	0.0071	0.011504	6.05981e-06	0.2023	17097	order.Burkholderiales.id.2874	FT4	0.0012171	20.8316
rs10831953	G	A	0.0537537	-0.0023	0.0068	0.0123746	9.94742e-06	0.7329	14915	order.Bifidobacteriales.id.432	FT4	0.00126352	18.8668
rs13020688	G	A	0.0584045	-0.003	0.0074	0.0122081	1.57375e-06	0.6837	14795	order.Bifidobacteriales.id.432	FT4	0.00154457	22.8841
rs182549	C	T	0.11707	-0.0179	0.0081	0.0126703	5.942e-20	0.02684	14915	order.Bifidobacteriales.id.432	FT4	0.0056913	85.3602
rs4957061	T	C	0.0569873	0.0089	0.0085	0.0116907	1.1517e-06	0.2959	14795	order.Bifidobacteriales.id.432	FT4	0.00160347	23.7582
rs540489	T	G	-0.0632518	0.0148	0.0084	0.013817	5.36811e-06	0.07863	14688	order.Bifidobacteriales.id.432	FT4	0.00142475	20.9538
rs55888705	A	G	0.053673	0.0064	0.007	0.0120586	8.66208e-06	0.3647	14914	order.Bifidobacteriales.id.432	FT4	0.00132662	19.8088
rs6899771	A	G	-0.0914312	-0.0018	0.0112	0.0202604	7.27995e-06	0.8729	14150	order.Bifidobacteriales.id.432	FT4	0.00143719	20.3626
rs7174549	C	T	0.0551726	-0.0136	0.0069	0.0124655	6.8678e-06	0.04775	14915	order.Bifidobacteriales.id.432	FT4	0.00131171	19.5872
rs7322849	T	C	0.110676	0.0031	0.0132	0.0200996	1.74032e-08	0.8158	14915	order.Bifidobacteriales.id.432	FT4	0.00202874	30.3161
rs73797465	T	G	-0.0942612	-0.0042	0.0146	0.0208421	4.8495e-06	0.773	14795	order.Bifidobacteriales.id.432	FT4	0.0013806	20.4514
rs857444	C	T	0.0553965	-0.0031	0.0069	0.0120669	3.82492e-06	0.6556	14914	order.Bifidobacteriales.id.432	FT4	0.00141112	21.0723
rs11146701	A	G	0.0473596	0.0257	0.0084	0.010541	7.08228e-06	0.00228	18220	order.Bacteroidales.id.913	FT4	0.00110668	20.1839
rs111845179	T	C	0.102648	0.0155	0.0134	0.0213843	9.23988e-07	0.2471	16393	order.Bacteroidales.id.913	FT4	0.00140359	23.0386
rs17343978	A	C	-0.0552057	0.0008	0.0074	0.0120278	8.35928e-06	0.9122	18334	order.Bacteroidales.id.913	FT4	0.00114773	21.0645
rs2032750	T	C	-0.0508393	-0.0069	0.0071	0.0106807	1.91509e-06	0.3336	17853	order.Bacteroidales.id.913	FT4	0.00126746	22.6542
rs4146051	A	G	-0.107377	-0.019	0.0161	0.0245661	8.76426e-06	0.2374	11372	order.Bacteroidales.id.913	FT4	0.00167719	19.1017
rs4916508	G	A	-0.0466729	0.0058	0.0067	0.0105312	8.47116e-06	0.3811	18324	order.Bacteroidales.id.913	FT4	0.00107074	19.6392
rs55773148	G	A	-0.121514	0.0031	0.0143	0.0236759	3.89585e-07	0.83	11349	order.Bacteroidales.id.913	FT4	0.00231565	26.3366
rs62531359	T	G	0.0655728	0.008	0.0096	0.0149891	9.08665e-06	0.4041	18320	order.Bacteroidales.id.913	FT4	0.00104357	19.136
rs62575403	C	T	0.140055	0.0299	0.0168	0.0311128	7.06129e-06	0.07572	9668	order.Bacteroidales.id.913	FT4	0.00209157	20.2595
rs72706335	T	C	-0.22241	0.0091	0.0153	0.0493458	7.65519e-06	0.5522	3819	order.Bacteroidales.id.913	FT4	0.00529119	20.3039
rs73975615	G	A	-0.207018	-0.0361	0.0406	0.0442633	1.21616e-06	0.3742	3350	order.Bacteroidales.id.913	FT4	0.00648718	21.8609
rs7631304	G	A	-0.0645771	0.0124	0.0085	0.0132957	8.36781e-07	0.1438	18334	order.Bacteroidales.id.913	FT4	0.00128504	23.5876
rs79585701	A	C	0.0646823	0.0103	0.0091	0.0149628	9.98589e-06	0.2603	18334	order.Bacteroidales.id.913	FT4	0.00101823	18.6851
rs929878	C	T	-0.0548532	-0.0033	0.0073	0.012153	4.73377e-06	0.6535	18334	order.Bacteroidales.id.913	FT4	0.00110994	20.3701
rs10233278	T	C	-0.116319	-0.0044	0.0067	0.0248527	3.50803e-06	0.5149	3239	order.Bacillales.id.1674	FT4	0.00671757	21.8918
rs10410917	T	C	0.11471	0.0046	0.0068	0.0250025	5.57348e-06	0.499	3239	order.Bacillales.id.1674	FT4	0.00645675	21.0363
rs11034576	A	G	0.205765	0.0208	0.0129	0.0453311	8.85974e-06	0.1064	3076	order.Bacillales.id.1674	FT4	0.0066537	20.5905
rs11207728	G	A	-0.14455	0.0123	0.0085	0.0316912	5.73457e-06	0.1497	3239	order.Bacillales.id.1674	FT4	0.00638219	20.7918
rs11844714	A	G	-0.143245	0.0024	0.0086	0.0320272	5.06212e-06	0.7841	3239	order.Bacillales.id.1674	FT4	0.00613816	19.992
rs1287018	G	A	0.141125	0.0039	0.0086	0.0319309	9.87091e-06	0.6512	3207	order.Bacillales.id.1674	FT4	0.0060541	19.5216
rs4617108	A	G	0.248861	-0.0065	0.0143	0.0525929	1.97506e-06	0.6496	3018	order.Bacillales.id.1674	FT4	0.00736427	22.3754
rs62640857	A	G	0.148238	-0.0134	0.0088	0.0326455	4.49259e-06	0.1291	3235	order.Bacillales.id.1674	FT4	0.00633339	20.6064
rs74420793	A	G	-0.164413	-0.0042	0.0091	0.0353763	3.07323e-06	0.6437	3077	order.Bacillales.id.1674	FT4	0.00697078	21.5856
rs2889192	G	T	0.0884052	0.0057	0.008	0.0194997	3.96723e-06	0.4768	7711	order.Actinomycetales.id.420	FT4	0.00265848	20.5489
rs34583783	G	T	0.123688	0.0084	0.0104	0.0264254	5.53884e-06	0.4242	7711	order.Actinomycetales.id.420	FT4	0.00283314	21.9027
rs35011108	A	G	0.241546	-0.0299	0.0206	0.0503803	1.87658e-06	0.1456	3630	order.Actinomycetales.id.420	FT4	0.00629259	22.9741
rs4073240	G	A	0.074973	0.0021	0.0068	0.0164672	5.67895e-06	0.7625	7711	order.Actinomycetales.id.420	FT4	0.00268099	20.7233
rs58484246	T	C	0.075828	0.0027	0.0075	0.0168997	6.67477e-06	0.7202	7711	order.Actinomycetales.id.420	FT4	0.00260411	20.1275
rs11899949	G	A	0.130568	-0.0041	0.0079	0.0276239	2.7671e-06	0.6001	3258	genus.Victivallis.id.2256	FT4	0.00681057	22.3273
rs173120	T	C	0.13381	-0.0037	0.0076	0.0290127	7.65253e-06	0.6212	3263	genus.Victivallis.id.2256	FT4	0.00647679	21.2585
rs1882775	A	G	-0.13827	-0.014	0.0082	0.031273	8.72833e-06	0.08766	3258	genus.Victivallis.id.2256	FT4	0.00596445	19.5368
rs2546432	T	C	-0.110803	0.0081	0.0067	0.0249655	9.93269e-06	0.2252	3266	genus.Victivallis.id.2256	FT4	0.0059951	19.686
rs342302	A	G	-0.152754	0.0161	0.0117	0.0351572	8.15946e-06	0.1686	3265	genus.Victivallis.id.2256	FT4	0.0057487	18.8665
rs4764863	G	A	0.121561	0.0081	0.0067	0.0246058	8.2222e-07	0.226	3266	genus.Victivallis.id.2256	FT4	0.00741755	24.3918
rs4895919	T	C	-0.116918	0.0082	0.0066	0.0247515	2.75199e-06	0.2183	3254	genus.Victivallis.id.2256	FT4	0.00681034	22.2991
rs56349194	A	G	-0.158501	0.0049	0.0087	0.0315231	6.25748e-07	0.5736	3266	genus.Victivallis.id.2256	FT4	0.00768144	25.2663
rs911666	T	C	-0.118576	-0.0002	0.007	0.0263146	7.65252e-06	0.9763	3267	genus.Victivallis.id.2256	FT4	0.00617673	20.2924
rs11141494	G	A	-0.0783421	-0.0047	0.0075	0.0174393	9.74642e-06	0.5322	9291	genus.Veillonella.id.2198	FT4	0.00216736	20.1763
rs1882878	A	G	-0.0768966	-0.0156	0.0074	0.0163908	2.98089e-06	0.03539	9282	genus.Veillonella.id.2198	FT4	0.0023656	22.0049
rs2013594	T	C	-0.0720698	0.0039	0.0069	0.0155153	3.42129e-06	0.5669	9283	genus.Veillonella.id.2198	FT4	0.00231894	21.5721
rs55807413	A	G	0.107329	-0.0051	0.0109	0.0237633	5.51435e-06	0.6381	8610	genus.Veillonella.id.2198	FT4	0.00236369	20.3949
rs62376424	C	T	-0.0762216	-0.0111	0.0072	0.0163499	3.65453e-06	0.1244	8999	genus.Veillonella.id.2198	FT4	0.00240926	21.7284
rs6656807	A	G	0.0703062	0.0089	0.0082	0.0153954	5.49694e-06	0.2749	8999	genus.Veillonella.id.2198	FT4	0.0023121	20.8502
rs742016	A	G	-0.0688571	0.0069	0.0067	0.0149769	4.65692e-06	0.3038	9279	genus.Veillonella.id.2198	FT4	0.00227281	21.1329
rs10898797	C	T	0.12238	0.0158	0.0092	0.0274683	8.85446e-06	0.08575	5387	genus.Tyzzerella3.id.11335	FT4	0.00367127	19.8426
rs112102233	A	G	-0.216348	0.0028	0.0151	0.0477575	6.17669e-06	0.8509	3857	genus.Tyzzerella3.id.11335	FT4	0.00529261	20.5116
rs1232220	G	T	-0.143869	-0.0138	0.0112	0.031828	7.90792e-06	0.2168	5000	genus.Tyzzerella3.id.11335	FT4	0.00406982	20.4241
rs17706273	T	C	-0.140368	-0.0006	0.0091	0.0274708	5.87816e-07	0.946	5395	genus.Tyzzerella3.id.11335	FT4	0.00481624	26.0997
rs191093	G	A	0.159008	0.0132	0.0155	0.0353306	6.76393e-06	0.3937	4621	genus.Tyzzerella3.id.11335	FT4	0.00436417	20.2465
rs4904512	T	C	-0.117151	0.0082	0.0087	0.0250306	3.09269e-06	0.3485	5396	genus.Tyzzerella3.id.11335	FT4	0.00404314	21.8972
rs55799124	A	G	-0.11435	-0.0103	0.0091	0.0238604	1.3355e-06	0.2556	5362	genus.Tyzzerella3.id.11335	FT4	0.00426515	22.9591
rs67476743	T	G	0.132164	0.0028	0.0092	0.022208	3.74049e-09	0.759	4948	genus.Tyzzerella3.id.11335	FT4	0.00710688	35.4022
rs6920448	C	T	-0.141081	0.0064	0.01	0.0305446	4.15376e-06	0.5219	5010	genus.Tyzzerella3.id.11335	FT4	0.00424017	21.3252
rs7019909	T	C	0.144156	-0.0024	0.0107	0.0301626	1.7612e-06	0.8203	5396	genus.Tyzzerella3.id.11335	FT4	0.00421519	22.833
rs7333521	T	C	-0.207191	-0.0173	0.0149	0.0453121	4.87602e-06	0.2472	4335	genus.Tyzzerella3.id.11335	FT4	0.00479996	20.8985
rs75091807	G	T	-0.184966	-0.0057	0.0136	0.0383029	1.70674e-06	0.6744	4621	genus.Tyzzerella3.id.11335	FT4	0.0050211	23.3095
rs7561370	T	C	0.131341	-0.0037	0.0106	0.0286292	1.51605e-06	0.7253	5396	genus.Tyzzerella3.id.11335	FT4	0.00388525	21.0388
rs11054680	T	C	-0.104751	-0.0046	0.0101	0.0226997	2.30977e-06	0.649	8928	genus.Turicibacter.id.2162	FT4	0.00237951	21.2901
rs11666533	C	T	-0.111689	0.0061	0.014	0.0248436	7.37109e-06	0.6644	8256	genus.Turicibacter.id.2162	FT4	0.00244208	20.2063
rs12603364	T	C	0.110861	0.0118	0.0099	0.0225598	8.66598e-07	0.2341	8923	genus.Turicibacter.id.2162	FT4	0.00269898	24.1428
rs149744580	A	G	0.169883	-0.0037	0.0156	0.0315478	7.00965e-08	0.8121	8459	genus.Turicibacter.id.2162	FT4	0.00341628	28.9905
rs2834977	T	C	-0.0959995	0.0031	0.009	0.0208261	3.95588e-06	0.732	8946	genus.Turicibacter.id.2162	FT4	0.00236953	21.2435
rs2952020	G	A	-0.0759019	0.0055	0.0075	0.0165764	5.63308e-06	0.4621	8949	genus.Turicibacter.id.2162	FT4	0.00233741	20.9618
rs3734633	G	A	-0.120957	0.0143	0.0113	0.02683	5.31914e-06	0.2071	8626	genus.Turicibacter.id.2162	FT4	0.00235064	20.3197
rs4869133	G	A	0.131186	-0.0003	0.0127	0.027197	2.55369e-06	0.9799	8256	genus.Turicibacter.id.2162	FT4	0.00281024	23.2611
rs55756211	T	C	-0.115115	0.0084	0.0107	0.0240708	2.80533e-06	0.4332	8941	genus.Turicibacter.id.2162	FT4	0.00255147	22.8659
rs7199484	G	A	-0.0731428	0.0024	0.007	0.0160172	5.76664e-06	0.7378	8948	genus.Turicibacter.id.2162	FT4	0.00232507	20.8485
rs1883097	C	T	0.226399	-0.0098	0.0148	0.0454642	4.15789e-07	0.5064	4417	genus.Terrisporobacter.id.11348	FT4	0.00558278	24.7864
rs2569953	A	C	-0.0775591	0.0067	0.0065	0.0174641	8.95009e-06	0.3057	6637	genus.Terrisporobacter.id.11348	FT4	0.00296287	19.7171
rs2872237	C	A	-0.0814505	-0.002	0.007	0.0175943	3.97135e-06	0.7732	6632	genus.Terrisporobacter.id.11348	FT4	0.00322105	21.4246
rs58405430	G	T	0.134617	0.012	0.0106	0.0301177	7.9371e-06	0.2609	6176	genus.Terrisporobacter.id.11348	FT4	0.00322438	19.9717
rs7184125	T	C	0.091256	-0.0183	0.0081	0.0205493	8.48103e-06	0.02445	6232	genus.Terrisporobacter.id.11348	FT4	0.00315448	19.7146
rs1145877	A	G	-0.073548	0.0017	0.0089	0.0162413	7.19949e-06	0.8509	13251	genus.Sutterella.id.2896	FT4	0.00154518	20.5037
rs11591622	T	G	-0.0688382	0.0178	0.0076	0.0151375	6.49857e-06	0.01983	12604	genus.Sutterella.id.2896	FT4	0.00163806	20.6767
rs13173038	A	G	-0.0718076	0	0.0081	0.0151627	2.72984e-06	0.9951	13245	genus.Sutterella.id.2896	FT4	0.00169044	22.4245
rs143438747	T	C	-0.145793	0.0033	0.0147	0.0306867	3.28021e-06	0.8204	9368	genus.Sutterella.id.2896	FT4	0.00240369	22.5672
rs2050185	G	A	0.0575138	-0.0034	0.0067	0.0128766	7.96955e-06	0.6114	13243	genus.Sutterella.id.2896	FT4	0.00150418	19.9468
rs2321387	G	A	-0.0592876	-0.0183	0.0066	0.0124509	1.86519e-06	0.005353	13252	genus.Sutterella.id.2896	FT4	0.00170805	22.6704
rs2613606	C	T	-0.0556794	0.0055	0.0066	0.0124117	7.2023e-06	0.4037	13249	genus.Sutterella.id.2896	FT4	0.00151663	20.1214
rs607327	C	T	0.0578334	0.0114	0.0067	0.0129053	6.6306e-06	0.09103	13251	genus.Sutterella.id.2896	FT4	0.00151327	20.0797
rs62501473	G	A	0.0694233	-0.0064	0.0086	0.0149416	5.51851e-06	0.458	12762	genus.Sutterella.id.2896	FT4	0.00168873	21.5846
rs7499539	A	G	0.0617478	0.0063	0.007	0.0130998	2.35769e-06	0.3685	13254	genus.Sutterella.id.2896	FT4	0.00167354	22.215
rs7638039	T	C	0.0645624	-0.002	0.008	0.0143887	8.66397e-06	0.8003	13236	genus.Sutterella.id.2896	FT4	0.0015188	20.1304
rs9350083	T	G	-0.0593069	-0.0192	0.007	0.0133929	8.22778e-06	0.005735	13254	genus.Sutterella.id.2896	FT4	0.0014773	19.6062
rs10065321	T	C	-0.0512828	-0.0064	0.0066	0.0108105	2.10155e-06	0.3326	17589	genus.Subdoligranulum.id.2070	FT4	0.00127777	22.5009
rs10497836	C	T	-0.0524065	-0.006	0.0075	0.0118697	8.37954e-06	0.4282	17579	genus.Subdoligranulum.id.2070	FT4	0.00110768	19.4912
rs1667315	G	A	0.0485017	0.0073	0.0069	0.0107452	6.72143e-06	0.2899	17586	genus.Subdoligranulum.id.2070	FT4	0.00115722	20.3721
rs2114677	C	T	-0.104176	-0.0088	0.014	0.0230829	2.71726e-06	0.5295	15566	genus.Subdoligranulum.id.2070	FT4	0.00130681	20.3659
rs2171249	C	T	0.106744	-0.0012	0.014	0.0233213	4.50556e-06	0.9297	14679	genus.Subdoligranulum.id.2070	FT4	0.00142516	20.947
rs35940633	G	A	-0.0511008	-0.0167	0.0068	0.011001	4.21698e-06	0.01343	17582	genus.Subdoligranulum.id.2070	FT4	0.00122571	21.5745
rs3761728	T	G	-0.0543458	-0.0032	0.0076	0.0118866	3.86747e-06	0.671	17570	genus.Subdoligranulum.id.2070	FT4	0.0011883	20.901
rs4347804	A	G	0.166063	0.0232	0.0185	0.0357483	2.18405e-06	0.2104	4312	genus.Subdoligranulum.id.2070	FT4	0.00497953	21.5692
rs6555306	T	C	-0.0740777	0.0049	0.0102	0.0155463	2.80664e-06	0.6294	17591	genus.Subdoligranulum.id.2070	FT4	0.00128905	22.7024
rs75158211	T	C	-0.072343	-0.0014	0.0104	0.015933	7.52162e-06	0.8951	17165	genus.Subdoligranulum.id.2070	FT4	0.00119958	20.6132
rs76528319	G	T	-0.143279	-0.0376	0.0168	0.0310662	7.41394e-06	0.02469	8468	genus.Subdoligranulum.id.2070	FT4	0.00250562	21.2659
rs10028567	C	T	-0.0921167	0.0145	0.0118	0.0191881	7.30343e-06	0.2218	16311	genus.Streptococcus.id.1853	FT4	0.00141097	23.044
rs10448310	A	G	-0.0517935	-0.013	0.0065	0.0111324	3.30706e-06	0.04656	16384	genus.Streptococcus.id.1853	FT4	0.00131942	21.6433
rs11110281	T	C	-0.137519	0.0161	0.0128	0.0227398	2.58314e-09	0.21	15120	genus.Streptococcus.id.1853	FT4	0.00241296	36.5673
rs11720390	G	A	0.107024	0.0205	0.0128	0.0228121	3.59482e-06	0.1107	15220	genus.Streptococcus.id.1853	FT4	0.00144407	22.0076
rs11764382	A	G	-0.0695345	0.0091	0.0082	0.0143671	1.28631e-06	0.2683	16387	genus.Streptococcus.id.1853	FT4	0.00142738	23.4211
rs17708276	A	G	-0.0793955	-0.0051	0.0099	0.0170628	3.04096e-06	0.6047	16278	genus.Streptococcus.id.1853	FT4	0.00132836	21.6491
rs1918540	G	A	0.059639	0.0091	0.0075	0.0128148	2.44067e-06	0.2215	16373	genus.Streptococcus.id.1853	FT4	0.0013211	21.6563
rs2370083	G	T	-0.0816836	-0.002	0.0121	0.0185851	9.75245e-06	0.8686	16277	genus.Streptococcus.id.1853	FT4	0.00118536	19.3146
rs4968759	A	G	-0.0515109	-0.0002	0.0066	0.0112068	3.78116e-06	0.9735	16384	genus.Streptococcus.id.1853	FT4	0.00128781	21.1242
rs57646748	G	A	-0.0907696	0.004	0.0126	0.0200344	5.4754e-06	0.7534	15939	genus.Streptococcus.id.1853	FT4	0.00128619	20.5245
rs6806351	T	C	-0.0633829	0.0002	0.0082	0.0136647	4.93869e-06	0.977	15973	genus.Streptococcus.id.1853	FT4	0.00134515	21.5123
rs71481756	T	G	0.0931048	0.0185	0.0135	0.0207949	6.51476e-06	0.1721	14526	genus.Streptococcus.id.1853	FT4	0.00137811	20.0433
rs72739637	A	G	0.0959942	-0.0013	0.0116	0.0193213	1.03307e-06	0.912	14920	genus.Streptococcus.id.1853	FT4	0.0016517	24.6809
rs7916711	A	G	0.102891	-0.0073	0.014	0.0217362	2.71702e-06	0.6037	15294	genus.Streptococcus.id.1853	FT4	0.00146295	22.4042
rs9903102	C	A	-0.0709483	0.0009	0.0096	0.0155275	4.17998e-06	0.9291	16384	genus.Streptococcus.id.1853	FT4	0.00127265	20.8751
rs10409783	A	G	0.0950828	0.0025	0.0087	0.0211239	7.69592e-06	0.7726	5941	genus.Slackia.id.825	FT4	0.00339873	20.2539
rs12440440	A	G	0.0901934	-0.0022	0.0069	0.0190582	2.62872e-06	0.7509	6063	genus.Slackia.id.825	FT4	0.00368039	22.3893
rs16894137	C	T	-0.122792	-0.0318	0.0094	0.0263047	2.71183e-06	0.0007115	6063	genus.Slackia.id.825	FT4	0.00358121	21.7837
rs35156985	T	C	-0.155709	0.0052	0.0136	0.0348085	8.05947e-06	0.7019	5965	genus.Slackia.id.825	FT4	0.00334343	20.0037
rs4492265	A	G	-0.0905757	-0.0159	0.0072	0.0191658	2.40925e-06	0.02683	6063	genus.Slackia.id.825	FT4	0.00367014	22.3267
rs8901	C	T	0.0934594	0.0063	0.0067	0.0186813	6.06998e-07	0.3527	6063	genus.Slackia.id.825	FT4	0.00411107	25.0201
rs10036909	C	T	0.185519	-0.0192	0.0138	0.0400881	8.05438e-06	0.1641	4996	genus.Senegalimassilia.id.11160	FT4	0.00426843	21.4079
rs11787826	C	A	0.081327	0.0258	0.0065	0.0171154	2.63466e-06	7.377e-05	6923	genus.Senegalimassilia.id.11160	FT4	0.00325077	22.572
rs1990708	A	C	-0.109619	0.0018	0.0101	0.0247785	8.90578e-06	0.8616	6923	genus.Senegalimassilia.id.11160	FT4	0.00281906	19.5659
rs2017373	C	T	0.0782258	0.0007	0.0069	0.0176841	9.50288e-06	0.9157	6923	genus.Senegalimassilia.id.11160	FT4	0.00281848	19.5618
rs7225245	G	A	0.079173	0.006	0.0068	0.0170421	4.18017e-06	0.3804	6923	genus.Senegalimassilia.id.11160	FT4	0.00310786	21.5766
rs113379006	T	C	-0.162759	0.01	0.0095	0.0357025	7.20777e-06	0.289	3154	genus.Sellimonas.id.14369	FT4	0.00654603	20.769
rs2016057	A	C	-0.125878	-0.0006	0.0066	0.0256153	1.02698e-06	0.9287	3154	genus.Sellimonas.id.14369	FT4	0.00759841	24.1336
rs2187447	A	C	0.243457	-0.0017	0.0147	0.0527695	3.97806e-06	0.9054	3028	genus.Sellimonas.id.14369	FT4	0.0069804	21.2712
rs2371572	A	C	0.127349	0.0046	0.0068	0.0250862	4.46357e-07	0.5016	3154	genus.Sellimonas.id.14369	FT4	0.00810446	25.754
rs41816	A	G	0.132201	-0.0083	0.0076	0.0291087	8.39372e-06	0.276	3154	genus.Sellimonas.id.14369	FT4	0.00649729	20.6134
rs4600608	A	G	-0.137152	-0.0183	0.0085	0.0301702	4.94843e-06	0.03203	3095	genus.Sellimonas.id.14369	FT4	0.00663279	20.6522
rs553697	T	C	-0.153767	0.0032	0.0107	0.0339099	6.12773e-06	0.767	3047	genus.Sellimonas.id.14369	FT4	0.00670319	20.549
rs56203279	T	C	-0.124045	0.0135	0.007	0.0269115	3.71999e-06	0.05315	3154	genus.Sellimonas.id.14369	FT4	0.00669122	21.2328
rs12406309	A	C	-0.063193	-0.016	0.0083	0.0142275	9.78953e-06	0.05326	15339	genus.Ruminococcus2.id.11374	FT4	0.00128447	19.7252
rs12986628	C	T	0.0665937	-0.0063	0.0081	0.0140168	2.14202e-06	0.4363	14714	genus.Ruminococcus2.id.11374	FT4	0.00153169	22.5688
rs1819812	G	T	0.0842356	-0.0064	0.0117	0.0184893	5.28435e-06	0.5828	14868	genus.Ruminococcus2.id.11374	FT4	0.00139409	20.7535
rs2368224	T	G	0.199648	-0.0027	0.0178	0.0438453	3.6293e-06	0.8815	3026	genus.Ruminococcus2.id.11374	FT4	0.00680529	20.7202
rs2846589	G	T	0.0522093	0.0054	0.007	0.0116382	7.58896e-06	0.4457	14924	genus.Ruminococcus2.id.11374	FT4	0.00134666	20.1219
rs2997412	A	G	-0.0568439	-0.0155	0.007	0.0122325	4.22116e-06	0.02742	15336	genus.Ruminococcus2.id.11374	FT4	0.0014061	21.5915
rs4400279	A	G	0.0546114	-0.0033	0.0069	0.0120077	5.79929e-06	0.6321	15333	genus.Ruminococcus2.id.11374	FT4	0.0013472	20.6817
rs4799823	C	T	0.0837001	-0.0051	0.0112	0.0182263	5.40138e-06	0.6459	14650	genus.Ruminococcus2.id.11374	FT4	0.00143746	21.0862
rs55707116	C	A	0.0865521	-0.0116	0.0108	0.0189141	8.00593e-06	0.2815	15336	genus.Ruminococcus2.id.11374	FT4	0.00136358	20.9377
rs58681734	A	G	0.0723875	0.0097	0.0095	0.0160787	4.18175e-06	0.3106	15338	genus.Ruminococcus2.id.11374	FT4	0.00131972	20.266
rs61791565	T	C	-0.0523503	0.003	0.007	0.0117119	6.78933e-06	0.6644	15319	genus.Ruminococcus2.id.11374	FT4	0.00130253	19.9769
rs75140805	T	G	0.0836825	0.0172	0.0117	0.0176445	3.95297e-06	0.1438	14249	genus.Ruminococcus2.id.11374	FT4	0.00157609	22.49
rs7635831	G	A	0.0618344	-0.0025	0.0091	0.0129031	1.98054e-06	0.7823	14924	genus.Ruminococcus2.id.11374	FT4	0.00153645	22.9622
rs7693984	G	A	-0.102822	-0.017	0.0126	0.0235087	9.42134e-06	0.1793	14154	genus.Ruminococcus2.id.11374	FT4	0.00134974	19.1273
rs78120384	A	G	-0.192815	-0.0079	0.0184	0.0392045	3.31185e-07	0.6672	6082	genus.Ruminococcus2.id.11374	FT4	0.00396134	24.1807
rs10167839	A	G	0.0519509	-0.0067	0.0074	0.0116306	8.09254e-06	0.362	16605	genus.Ruminococcus1.id.11373	FT4	0.0012001	19.9492
rs11783695	G	T	-0.0734114	-0.0007	0.0096	0.0161398	4.72679e-06	0.9422	16606	genus.Ruminococcus1.id.11373	FT4	0.0012443	20.6861
rs17781867	C	T	0.0999271	-0.0133	0.0128	0.0211728	1.96335e-06	0.2987	14349	genus.Ruminococcus1.id.11373	FT4	0.00154994	22.2715
rs3819978	C	T	-0.11504	0.018	0.0159	0.0260137	8.74133e-06	0.2595	12769	genus.Ruminococcus1.id.11373	FT4	0.00152922	19.5535
rs6105066	T	C	-0.0607052	-0.0077	0.0088	0.013425	5.05914e-06	0.3861	16049	genus.Ruminococcus1.id.11373	FT4	0.0012724	20.4442
rs6493760	C	T	0.0535262	-0.0099	0.0079	0.0115885	3.38363e-06	0.2095	16126	genus.Ruminococcus1.id.11373	FT4	0.00132124	21.3318
rs7117576	A	G	0.0829505	0.0061	0.0103	0.0170891	6.47979e-07	0.5529	16606	genus.Ruminococcus1.id.11373	FT4	0.00141683	23.5584
rs7583465	C	T	0.0527654	-0.0029	0.007	0.0112619	2.55613e-06	0.6763	16588	genus.Ruminococcus1.id.11373	FT4	0.00132162	21.9495
rs78572139	G	A	0.125038	-0.0175	0.0163	0.0279411	5.23105e-06	0.2825	11667	genus.Ruminococcus1.id.11373	FT4	0.00171352	20.0226
rs10495392	C	T	-0.082486	0.0065	0.0097	0.0187194	9.96329e-06	0.5028	13902	genus.RuminococcaceaeUCG014.id.11371	FT4	0.00139473	19.4139
rs10791168	A	G	-0.0664624	0.0202	0.0093	0.0150069	9.76182e-06	0.03007	14403	genus.RuminococcaceaeUCG014.id.11371	FT4	0.00135996	19.6115
rs10941294	C	T	-0.122057	0.0035	0.0143	0.0260017	2.397e-06	0.8065	12615	genus.RuminococcaceaeUCG014.id.11371	FT4	0.00174374	22.0322
rs115777838	T	C	-0.18835	0.0068	0.0183	0.0386643	4.62331e-07	0.7102	5674	genus.RuminococcaceaeUCG014.id.11371	FT4	0.00416492	23.7222
rs12638134	T	G	0.0582548	-0.0047	0.0066	0.0119657	1.21144e-06	0.4749	14403	genus.RuminococcaceaeUCG014.id.11371	FT4	0.00164293	23.6987
rs34402072	C	T	-0.0688023	-0.0114	0.0087	0.0156083	9.80426e-06	0.1874	13863	genus.RuminococcaceaeUCG014.id.11371	FT4	0.00139968	19.4282
rs56105232	G	A	0.139276	0.0009	0.0149	0.0299132	2.9128e-06	0.9513	9190	genus.RuminococcaceaeUCG014.id.11371	FT4	0.00235335	21.6736
rs72809222	T	C	0.0671775	-0.0094	0.0078	0.0139838	2.41191e-06	0.2272	13922	genus.RuminococcaceaeUCG014.id.11371	FT4	0.00165492	23.0747
rs73186226	G	A	-0.0993852	0.0128	0.0119	0.0216819	6.71749e-06	0.2822	13760	genus.RuminococcaceaeUCG014.id.11371	FT4	0.00152465	21.0081
rs853612	A	G	-0.0528257	-0.0055	0.0066	0.0119367	9.75451e-06	0.4058	14403	genus.RuminococcaceaeUCG014.id.11371	FT4	0.00135794	19.5823
rs995642	C	T	0.060048	0.0063	0.0073	0.0126417	1.90222e-06	0.3834	14402	genus.RuminococcaceaeUCG014.id.11371	FT4	0.00156417	22.5593
rs11581881	C	T	0.0661211	0.0142	0.01	0.0144736	4.72582e-06	0.156	15730	genus.RuminococcaceaeUCG013.id.11370	FT4	0.00132501	20.8674
rs12189346	G	A	0.0684961	-0.0081	0.0096	0.014558	1.67955e-06	0.3981	16470	genus.RuminococcaceaeUCG013.id.11370	FT4	0.0013423	22.1347
rs12336782	T	C	-0.0856047	-0.0101	0.0112	0.0189311	8.60305e-06	0.367	16772	genus.RuminococcaceaeUCG013.id.11370	FT4	0.00121767	20.4452
rs12485353	G	A	-0.0607903	0.0029	0.0083	0.0130847	4.19379e-06	0.7247	16771	genus.RuminococcaceaeUCG013.id.11370	FT4	0.00128536	21.5819
rs12781711	C	T	-0.0656129	-0.0039	0.0069	0.0117477	2.55301e-08	0.5702	16772	genus.RuminococcaceaeUCG013.id.11370	FT4	0.00185645	31.1906
rs16918863	A	C	0.111491	-0.0082	0.0135	0.0240157	4.15503e-06	0.5431	12643	genus.RuminococcaceaeUCG013.id.11370	FT4	0.00170177	21.5488
rs2730183	G	A	-0.0488692	0.0023	0.0065	0.0109907	8.43787e-06	0.7216	16772	genus.RuminococcaceaeUCG013.id.11370	FT4	0.00117739	19.7681
rs4385846	G	T	0.0598404	-0.0041	0.0078	0.0131807	6.46209e-06	0.6024	16772	genus.RuminococcaceaeUCG013.id.11370	FT4	0.00122743	20.6092
rs75088940	T	C	-0.0942968	0.0081	0.0122	0.0200713	2.55399e-06	0.5063	15638	genus.RuminococcaceaeUCG013.id.11370	FT4	0.00140946	22.0694
rs76973485	G	T	0.194976	-0.0075	0.0155	0.0418213	3.3498e-06	0.63	5299	genus.RuminococcaceaeUCG013.id.11370	FT4	0.00408501	21.7271
rs7784330	G	A	-0.0498329	-0.0082	0.0067	0.0112066	8.1626e-06	0.2196	16770	genus.RuminococcaceaeUCG013.id.11370	FT4	0.00117771	19.7712
rs9313055	T	C	0.105087	-0.0194	0.0148	0.023446	9.54713e-06	0.192	15764	genus.RuminococcaceaeUCG013.id.11370	FT4	0.00127275	20.0866
rs10274562	C	T	0.110917	-0.0036	0.0073	0.0244556	6.49607e-06	0.6193	3632	genus.RuminococcaceaeUCG011.id.11368	FT4	0.00563177	20.5591
rs12636310	G	A	0.132725	0.0175	0.0079	0.0282037	2.81235e-06	0.02662	3632	genus.RuminococcaceaeUCG011.id.11368	FT4	0.00606054	22.1339
rs12724320	C	T	-0.120881	0.0068	0.0071	0.0249229	1.51986e-06	0.341	3632	genus.RuminococcaceaeUCG011.id.11368	FT4	0.00643526	23.5113
rs1416041	A	C	-0.182339	-0.0066	0.0094	0.0339898	7.04419e-08	0.4857	3632	genus.RuminococcaceaeUCG011.id.11368	FT4	0.00786121	28.7623
rs2729556	C	T	-0.109097	-0.0017	0.0066	0.0233699	3.18679e-06	0.7987	3632	genus.RuminococcaceaeUCG011.id.11368	FT4	0.00596442	21.7808
rs4490371	T	C	-0.111816	0.0089	0.007	0.0248963	7.74624e-06	0.2007	3610	genus.RuminococcaceaeUCG011.id.11368	FT4	0.00555667	20.1605
rs79113084	C	T	-0.152166	0.0003	0.01	0.0317519	2.06123e-06	0.9734	3610	genus.RuminococcaceaeUCG011.id.11368	FT4	0.00632166	22.9536
rs9729514	A	G	0.184934	-0.0076	0.0106	0.0394616	2.36769e-06	0.4748	3632	genus.RuminococcaceaeUCG011.id.11368	FT4	0.00601059	21.9504
rs12597105	G	A	0.0670855	-0.0147	0.0073	0.0144415	4.873e-06	0.04492	12415	genus.RuminococcaceaeUCG010.id.11367	FT4	0.00173513	21.5756
rs2820282	A	C	-0.0592304	0.0011	0.007	0.0125917	2.85385e-06	0.8813	12865	genus.RuminococcaceaeUCG010.id.11367	FT4	0.00171698	22.1235
rs682403	A	G	-0.0588161	0.012	0.0066	0.0124671	2.36537e-06	0.07004	12864	genus.RuminococcaceaeUCG010.id.11367	FT4	0.00172716	22.2531
rs6958419	C	T	-0.0585718	-0.0058	0.0066	0.0124994	2.84162e-06	0.3784	12870	genus.RuminococcaceaeUCG010.id.11367	FT4	0.00170326	21.955
rs73218807	G	A	-0.166211	0.0406	0.0174	0.0367938	6.43033e-06	0.01964	6714	genus.RuminococcaceaeUCG010.id.11367	FT4	0.00303018	20.4004
rs7441445	C	T	-0.05695	-0.0013	0.0074	0.0126502	6.80187e-06	0.8587	12852	genus.RuminococcaceaeUCG010.id.11367	FT4	0.00157447	20.2639
rs113006825	T	C	-0.0928893	0.0105	0.0084	0.0208035	7.97701e-06	0.2089	7165	genus.RuminococcaceaeUCG009.id.11366	FT4	0.00277483	19.9314
rs12508214	C	T	-0.0774649	0.0011	0.0075	0.0168937	4.75487e-06	0.8799	7511	genus.RuminococcaceaeUCG009.id.11366	FT4	0.00279157	21.0206
rs138460696	A	G	0.139274	0.0159	0.014	0.0315794	9.80841e-06	0.2589	6865	genus.RuminococcaceaeUCG009.id.11366	FT4	0.0028253	19.4449
rs1550196	G	A	0.130842	-0.0154	0.0107	0.0262478	1.13288e-06	0.1495	7389	genus.RuminococcaceaeUCG009.id.11366	FT4	0.00335168	24.8421
rs2058609	A	G	0.0816464	-0.0019	0.0069	0.017472	3.12485e-06	0.7845	7510	genus.RuminococcaceaeUCG009.id.11366	FT4	0.00289928	21.8311
rs2192926	A	G	-0.089048	0.0121	0.0082	0.0192989	4.87746e-06	0.1412	7511	genus.RuminococcaceaeUCG009.id.11366	FT4	0.00282655	21.2847
rs4079028	C	T	0.0915623	0.0085	0.008	0.019936	3.28244e-06	0.286	7480	genus.RuminococcaceaeUCG009.id.11366	FT4	0.0028121	21.0882
rs4708333	T	G	-0.084033	-0.0073	0.0072	0.0174757	1.56246e-06	0.3086	7511	genus.RuminococcaceaeUCG009.id.11366	FT4	0.003069	23.1161
rs6952765	G	A	0.0732099	0.0096	0.0065	0.0166777	8.13062e-06	0.1386	7511	genus.RuminococcaceaeUCG009.id.11366	FT4	0.00255892	19.2643
rs78410648	A	G	0.120989	-0.0032	0.0111	0.0277317	9.67203e-06	0.7748	7510	genus.RuminococcaceaeUCG009.id.11366	FT4	0.00252813	19.0293
rs9558661	T	C	-0.0897823	-0.0057	0.0085	0.0200739	7.00847e-06	0.5063	7480	genus.RuminococcaceaeUCG009.id.11366	FT4	0.00266721	19.9988
rs10873449	T	C	0.0654843	-0.0049	0.0087	0.0143973	4.11169e-06	0.5736	16098	genus.RuminococcaceaeUCG005.id.11363	FT4	0.00128345	20.685
rs10937802	G	A	0.0755811	-0.017	0.0112	0.0168226	8.17353e-06	0.1303	15821	genus.RuminococcaceaeUCG005.id.11363	FT4	0.00127424	20.1829
rs10950694	T	C	0.0577628	0.002	0.0067	0.011412	4.298e-07	0.7637	15821	genus.RuminococcaceaeUCG005.id.11363	FT4	0.00161672	25.6164
rs114279581	A	G	-0.146604	0.0036	0.0158	0.0316034	3.21853e-06	0.8198	8465	genus.RuminococcaceaeUCG005.id.11363	FT4	0.00253568	21.514
rs12288512	A	G	0.066635	-0.0137	0.0083	0.0144356	3.10278e-06	0.09792	15473	genus.RuminococcaceaeUCG005.id.11363	FT4	0.0013752	21.305
rs12458218	T	C	0.0677322	0.0027	0.0084	0.0144525	2.41027e-06	0.7449	16099	genus.RuminococcaceaeUCG005.id.11363	FT4	0.00136243	21.9609
rs2893871	G	A	-0.073644	0.021	0.0095	0.015548	3.53845e-06	0.02718	16103	genus.RuminococcaceaeUCG005.id.11363	FT4	0.00139128	22.4322
rs34781347	G	A	0.188685	0.0241	0.0159	0.0386484	6.04728e-07	0.1301	6061	genus.RuminococcaceaeUCG005.id.11363	FT4	0.00391708	23.8269
rs55793120	T	C	0.121548	-0.0149	0.016	0.0279546	7.37046e-06	0.3504	11224	genus.RuminococcaceaeUCG005.id.11363	FT4	0.00168154	18.9021
rs72776570	C	A	0.087067	0.0075	0.0118	0.0197179	5.35716e-06	0.5251	15376	genus.RuminococcaceaeUCG005.id.11363	FT4	0.00126646	19.4953
rs7449320	C	A	0.0599163	-0.0076	0.008	0.0130836	4.80776e-06	0.3392	16095	genus.RuminococcaceaeUCG005.id.11363	FT4	0.0013013	20.9691
rs7555878	A	G	0.0586677	-0.013	0.0076	0.0125277	2.81022e-06	0.08831	16100	genus.RuminococcaceaeUCG005.id.11363	FT4	0.00136031	21.928
rs7586445	G	A	0.0782349	0.0114	0.0102	0.0176458	8.8145e-06	0.2659	15099	genus.RuminococcaceaeUCG005.id.11363	FT4	0.00130019	19.6545
rs898577	T	C	-0.123012	-0.0089	0.0146	0.0286671	7.46313e-06	0.5408	9991	genus.RuminococcaceaeUCG005.id.11363	FT4	0.00183959	18.4095
rs10976229	T	G	0.095976	-0.0074	0.0094	0.0214554	7.04477e-06	0.4338	9116	genus.RuminococcaceaeUCG004.id.11362	FT4	0.00219026	20.0059
rs11961899	G	A	-0.0707825	-0.0058	0.0073	0.0161381	9.1802e-06	0.4278	9501	genus.RuminococcaceaeUCG004.id.11362	FT4	0.00202068	19.2333
rs12125734	G	T	0.133972	-0.0051	0.011	0.0257417	2.09428e-07	0.6406	8938	genus.RuminococcaceaeUCG004.id.11362	FT4	0.00302133	27.0804
rs2248146	T	C	0.0689452	0.0054	0.007	0.0153649	8.20001e-06	0.4412	9502	genus.RuminococcaceaeUCG004.id.11362	FT4	0.00211452	20.1306
rs3800154	A	C	-0.0797959	0.0036	0.0081	0.0177639	6.11581e-06	0.6611	9406	genus.RuminococcaceaeUCG004.id.11362	FT4	0.00214066	20.1739
rs511258	G	A	-0.0757474	0.0089	0.0073	0.0162475	4.52052e-06	0.2277	9500	genus.RuminococcaceaeUCG004.id.11362	FT4	0.00228269	21.7306
rs550351	A	C	0.078587	-0.0053	0.007	0.018003	9.43128e-06	0.4464	9498	genus.RuminococcaceaeUCG004.id.11362	FT4	0.0020022	19.051
rs6769553	A	G	0.0849743	0.003	0.0071	0.0157451	7.91068e-08	0.6673	9501	genus.RuminococcaceaeUCG004.id.11362	FT4	0.00305624	29.1202
rs7569771	A	G	-0.075914	-0.0003	0.0081	0.0170308	8.11964e-06	0.9714	9502	genus.RuminococcaceaeUCG004.id.11362	FT4	0.00208666	19.8647
rs9818949	G	T	0.0859927	-0.0082	0.0085	0.0188671	5.38832e-06	0.332	9116	genus.RuminococcaceaeUCG004.id.11362	FT4	0.00227362	20.769
rs10490280	C	T	-0.0672094	0.0174	0.0083	0.0143309	4.15551e-06	0.03523	14004	genus.RuminococcaceaeUCG003.id.11361	FT4	0.00156811	21.9912
rs11243416	T	C	-0.0925653	-0.0131	0.0105	0.0191203	1.66882e-06	0.2113	14004	genus.RuminococcaceaeUCG003.id.11361	FT4	0.00167081	23.4339
rs11613919	G	T	0.0727604	-0.0051	0.0086	0.0155716	1.62509e-06	0.5523	14309	genus.RuminococcaceaeUCG003.id.11361	FT4	0.00152353	21.8303
rs16959793	A	C	-0.062527	0.009	0.0075	0.0131259	2.21709e-06	0.2292	14412	genus.RuminococcaceaeUCG003.id.11361	FT4	0.00157207	22.6892
rs2523124	T	C	-0.0546625	0.0173	0.0069	0.0120823	5.7837e-06	0.01284	14409	genus.RuminococcaceaeUCG003.id.11361	FT4	0.00141849	20.4652
rs3013089	G	A	-0.0551473	0.0012	0.0067	0.0120346	4.38133e-06	0.8529	14408	genus.RuminococcaceaeUCG003.id.11361	FT4	0.00145529	20.9955
rs4452755	A	C	-0.0634463	0.009	0.0072	0.0134741	3.29335e-06	0.2166	14406	genus.RuminococcaceaeUCG003.id.11361	FT4	0.00153675	22.1694
rs4532474	G	A	0.0769231	0.0043	0.0095	0.017045	4.82127e-06	0.6508	14412	genus.RuminococcaceaeUCG003.id.11361	FT4	0.00141119	20.3639
rs646327	G	A	0.0586696	0.0007	0.0065	0.0118369	7.8318e-07	0.9199	14406	genus.RuminococcaceaeUCG003.id.11361	FT4	0.00170241	24.5633
rs6759615	A	G	0.102523	-0.007	0.0123	0.0200204	7.86224e-07	0.5676	14410	genus.RuminococcaceaeUCG003.id.11361	FT4	0.00181653	26.2202
rs73341549	T	C	-0.169857	0.0041	0.015	0.0318768	1.50953e-07	0.7859	6744	genus.RuminococcaceaeUCG003.id.11361	FT4	0.00419253	28.3851
rs10916131	C	T	-0.069333	-0.0118	0.0089	0.0146753	2.87497e-06	0.1821	17097	genus.RuminococcaceaeUCG002.id.11360	FT4	0.00130382	22.3179
rs10927423	C	A	-0.0713617	-0.0034	0.009	0.0147712	8.49518e-07	0.7001	17096	genus.RuminococcaceaeUCG002.id.11360	FT4	0.00136336	23.3371
rs10964441	G	A	-0.14906	0.0248	0.0162	0.034486	7.45116e-06	0.1264	5346	genus.RuminococcaceaeUCG002.id.11360	FT4	0.00348252	18.6756
rs113147300	A	G	-0.075842	-0.0031	0.0098	0.0164562	7.6914e-06	0.753	16370	genus.RuminococcaceaeUCG002.id.11360	FT4	0.00129583	21.2377
rs11607472	A	G	-0.0780229	0.0088	0.01	0.0176325	7.18671e-06	0.3757	16282	genus.RuminococcaceaeUCG002.id.11360	FT4	0.00120112	19.5778
rs11750293	G	T	-0.0578304	0.0003	0.0076	0.0120512	1.76136e-06	0.9693	17094	genus.RuminococcaceaeUCG002.id.11360	FT4	0.00134531	23.0249
rs12463378	A	G	-0.0522061	0.02	0.0073	0.0112086	2.95523e-06	0.006208	16994	genus.RuminococcaceaeUCG002.id.11360	FT4	0.00127493	21.6912
rs15256	C	T	0.0732376	-0.0098	0.0112	0.016834	9.45659e-06	0.3829	17095	genus.RuminococcaceaeUCG002.id.11360	FT4	0.00110597	18.9253
rs55793120	T	C	0.137396	-0.0149	0.016	0.027414	4.80674e-07	0.3504	11669	genus.RuminococcaceaeUCG002.id.11360	FT4	0.00214802	25.1148
rs56030423	G	A	-0.0982874	0.0136	0.0137	0.0216344	6.30385e-06	0.3214	14937	genus.RuminococcaceaeUCG002.id.11360	FT4	0.00137988	20.637
rs57079348	T	G	-0.076573	-0.0044	0.0103	0.0172819	7.21822e-06	0.6699	16372	genus.RuminococcaceaeUCG002.id.11360	FT4	0.00119769	19.6296
rs6542556	A	G	0.050974	-0.0014	0.0072	0.011406	7.86123e-06	0.8462	17094	genus.RuminococcaceaeUCG002.id.11360	FT4	0.00116702	19.97
rs6793778	C	T	-0.0558706	-0.0017	0.0076	0.0125258	9.81289e-06	0.8253	17094	genus.RuminococcaceaeUCG002.id.11360	FT4	0.00116254	19.8932
rs7120052	A	C	0.0624796	-0.003	0.0084	0.0135523	1.96895e-06	0.7224	17097	genus.RuminococcaceaeUCG002.id.11360	FT4	0.00124162	21.252
rs7155595	C	A	0.0569929	0.0052	0.0072	0.0116986	1.14931e-06	0.4685	17084	genus.RuminococcaceaeUCG002.id.11360	FT4	0.00138733	23.7312
rs7249614	A	G	-0.0492778	0.0021	0.0077	0.0110807	9.07376e-06	0.7872	16651	genus.RuminococcaceaeUCG002.id.11360	FT4	0.00118635	19.7751
rs7342369	C	A	-0.0527803	0.0051	0.0075	0.0116023	5.66121e-06	0.4924	16651	genus.RuminococcaceaeUCG002.id.11360	FT4	0.00124129	20.6919
rs76847269	A	G	0.163508	-0.0268	0.0143	0.0356151	5.1719e-06	0.06124	7654	genus.RuminococcaceaeUCG002.id.11360	FT4	0.00274617	21.0716
rs77564310	A	C	-0.0713093	-0.0045	0.0085	0.0140855	3.28614e-07	0.5978	17000	genus.RuminococcaceaeUCG002.id.11360	FT4	0.00150537	25.6268
rs79016051	C	T	-0.0887747	-0.0018	0.012	0.0189424	2.33742e-06	0.882	16937	genus.RuminococcaceaeUCG002.id.11360	FT4	0.00129511	21.9612
rs882348	A	G	-0.0799946	-0.0202	0.0123	0.0178618	5.44852e-06	0.1016	17097	genus.RuminococcaceaeUCG002.id.11360	FT4	0.00117177	20.0549
rs11241747	C	T	0.0533858	0.007	0.0077	0.0120035	6.58971e-06	0.3619	14822	genus.RuminococcaceaeNK4A214group.id.11358	FT4	0.00133276	19.7779
rs11586410	G	A	-0.0863422	0.0148	0.0124	0.0169937	3.66276e-07	0.2325	14822	genus.RuminococcaceaeNK4A214group.id.11358	FT4	0.00173864	25.8114
rs12642039	T	C	-0.0553003	-0.0041	0.0071	0.0119397	3.43005e-06	0.5586	15276	genus.RuminococcaceaeNK4A214group.id.11358	FT4	0.00140232	21.449
rs12731	A	G	-0.0527684	-0.0198	0.0068	0.0115053	4.87237e-06	0.003509	15288	genus.RuminococcaceaeNK4A214group.id.11358	FT4	0.00137405	21.0326
rs13087692	T	G	0.0574623	0.0075	0.0069	0.012594	8.69224e-06	0.2785	15288	genus.RuminococcaceaeNK4A214group.id.11358	FT4	0.00135988	20.8154
rs136761	G	A	-0.0587521	0.0029	0.0069	0.0119155	8.15195e-07	0.6711	14822	genus.RuminococcaceaeNK4A214group.id.11358	FT4	0.00163759	24.3089
rs35559912	T	C	-0.0925071	0.0172	0.0132	0.0203674	4.89023e-06	0.1945	13976	genus.RuminococcaceaeNK4A214group.id.11358	FT4	0.00147386	20.6261
rs4814689	C	T	-0.1083	0.0158	0.0129	0.0230708	4.5519e-06	0.2214	14009	genus.RuminococcaceaeNK4A214group.id.11358	FT4	0.00157052	22.0329
rs5994253	A	G	-0.0811302	-0.0056	0.0102	0.0157621	2.35183e-07	0.5821	15288	genus.RuminococcaceaeNK4A214group.id.11358	FT4	0.00172996	26.4899
rs62027366	T	C	0.0615389	-0.0023	0.0085	0.0137612	6.58456e-06	0.7844	14822	genus.RuminococcaceaeNK4A214group.id.11358	FT4	0.0013474	19.9954
rs6681678	C	T	-0.100174	-0.0142	0.014	0.024	9.04931e-06	0.3105	13031	genus.RuminococcaceaeNK4A214group.id.11358	FT4	0.00133515	17.4189
rs7573569	T	C	0.107739	0.0354	0.0139	0.0233638	3.23139e-06	0.0109	14822	genus.RuminococcaceaeNK4A214group.id.11358	FT4	0.0014326	21.2616
rs115044523	G	A	-0.0980026	0.0034	0.0114	0.0202616	2.37202e-06	0.7682	16107	genus.Ruminiclostridium9.id.11357	FT4	0.00145038	23.3922
rs12040548	G	T	0.0570422	-0.0051	0.0074	0.0122359	3.14872e-06	0.4959	16721	genus.Ruminiclostridium9.id.11357	FT4	0.00129806	21.7304
rs6082461	A	C	0.0586425	-0.0003	0.0077	0.0131004	4.86594e-06	0.9693	16650	genus.Ruminiclostridium9.id.11357	FT4	0.00120204	20.0357
rs7137760	C	T	0.050797	0.0002	0.0069	0.0112182	7.06911e-06	0.9753	16722	genus.Ruminiclostridium9.id.11357	FT4	0.00122464	20.501
rs74303178	T	C	0.0532742	-0.0025	0.0072	0.0119274	7.91566e-06	0.7261	16706	genus.Ruminiclostridium9.id.11357	FT4	0.00119276	19.9477
rs78191726	T	C	0.0944998	0.0043	0.0116	0.0210206	7.58287e-06	0.7081	16039	genus.Ruminiclostridium9.id.11357	FT4	0.00125848	20.2077
rs918449	A	G	-0.0950908	0.0039	0.0123	0.0197177	2.55994e-06	0.7527	16725	genus.Ruminiclostridium9.id.11357	FT4	0.00138866	23.2548
rs9522712	T	C	0.0699728	-0.0027	0.0089	0.0154939	4.65962e-06	0.7576	16725	genus.Ruminiclostridium9.id.11357	FT4	0.00121798	20.3932
rs9809789	C	T	-0.0717454	-0.0259	0.0096	0.0159673	8.71968e-06	0.00699	16025	genus.Ruminiclostridium9.id.11357	FT4	0.00125828	20.1869
rs10829821	T	C	-0.097606	0.0008	0.0111	0.0216072	3.47141e-06	0.9459	12802	genus.Ruminiclostridium6.id.11356	FT4	0.00159142	20.4026
rs116969552	A	G	-0.166823	-0.0156	0.0205	0.0376681	9.15949e-06	0.4465	6824	genus.Ruminiclostridium6.id.11356	FT4	0.00286601	19.6081
rs11992182	A	C	0.0625299	-0.0066	0.0072	0.0137876	4.64839e-06	0.3556	13381	genus.Ruminiclostridium6.id.11356	FT4	0.00153478	20.5653
rs2548459	C	T	0.0554866	0.0018	0.0066	0.0122755	6.40206e-06	0.7827	13377	genus.Ruminiclostridium6.id.11356	FT4	0.00152503	20.4285
rs35362464	C	A	0.0720077	0.0034	0.0088	0.0165387	8.99138e-06	0.6991	13308	genus.Ruminiclostridium6.id.11356	FT4	0.00142241	18.9536
rs61060922	T	G	0.15913	-0.0108	0.0143	0.0322283	1.08647e-06	0.4487	8955	genus.Ruminiclostridium6.id.11356	FT4	0.00271506	24.3741
rs663262	T	C	-0.13498	0.0069	0.015	0.0310715	3.39417e-06	0.6442	7876	genus.Ruminiclostridium6.id.11356	FT4	0.00239041	18.8672
rs67479537	T	C	0.118994	0.0136	0.0151	0.026487	9.302e-06	0.3653	11613	genus.Ruminiclostridium6.id.11356	FT4	0.00173495	20.1795
rs71414120	T	G	0.200894	0.0147	0.0147	0.0406434	1.07697e-06	0.3164	5567	genus.Ruminiclostridium6.id.11356	FT4	0.0043695	24.423
rs72991535	T	G	0.135604	-0.0108	0.0161	0.0295174	4.95367e-06	0.5005	9642	genus.Ruminiclostridium6.id.11356	FT4	0.00218409	21.1007
rs73176030	T	C	0.058665	0.0077	0.0069	0.013208	7.28883e-06	0.2662	13378	genus.Ruminiclostridium6.id.11356	FT4	0.0014725	19.7252
rs77193512	A	G	0.0736533	0.0072	0.0085	0.0153163	1.29587e-06	0.3961	13380	genus.Ruminiclostridium6.id.11356	FT4	0.00172531	23.1211
rs792058	G	A	0.0554234	0.0022	0.0081	0.0125423	8.57953e-06	0.783	12933	genus.Ruminiclostridium6.id.11356	FT4	0.00150757	19.5238
rs79968172	G	A	0.11614	0.0072	0.0143	0.0243083	1.66054e-06	0.6145	12802	genus.Ruminiclostridium6.id.11356	FT4	0.00177991	22.8235
rs9555756	A	C	-0.0804138	-0.0115	0.0093	0.0176692	7.10127e-06	0.2148	13369	genus.Ruminiclostridium6.id.11356	FT4	0.00154688	20.7092
rs10827477	A	G	-0.0547387	-0.0065	0.0072	0.0115163	2.19177e-06	0.3663	17391	genus.Ruminiclostridium5.id.11355	FT4	0.00129739	22.5896
rs113753996	T	C	0.0820689	0.0009	0.0108	0.0174463	3.98895e-06	0.9315	16680	genus.Ruminiclostridium5.id.11355	FT4	0.00132489	22.1259
rs1223978	T	C	0.0484169	0.0072	0.0067	0.0108254	8.16186e-06	0.2832	17381	genus.Ruminiclostridium5.id.11355	FT4	0.00114956	20.0011
rs1492620	T	C	-0.0830505	-0.0164	0.0116	0.0180073	3.52577e-06	0.1548	17397	genus.Ruminiclostridium5.id.11355	FT4	0.00122119	21.2685
rs2482038	C	A	0.0518991	0.0079	0.0066	0.0108777	1.70314e-06	0.2304	17396	genus.Ruminiclostridium5.id.11355	FT4	0.00130686	22.7613
rs2791343	T	C	0.051717	-0.0071	0.007	0.0113369	5.53959e-06	0.305	17392	genus.Ruminiclostridium5.id.11355	FT4	0.00119512	20.808
rs2833828	G	A	0.0489617	-0.0031	0.0067	0.0108702	6.81651e-06	0.6398	17397	genus.Ruminiclostridium5.id.11355	FT4	0.00116481	20.2856
rs4955951	A	G	-0.0713749	-0.0044	0.01	0.0165826	9.95519e-06	0.6581	17397	genus.Ruminiclostridium5.id.11355	FT4	0.00106377	18.524
rs6121460	G	A	0.0932955	0.0056	0.0129	0.0199206	2.64107e-06	0.6645	17318	genus.Ruminiclostridium5.id.11355	FT4	0.00126494	21.9314
rs79968837	A	G	-0.0950311	0.0031	0.0119	0.0193507	1.14623e-06	0.7934	16602	genus.Ruminiclostridium5.id.11355	FT4	0.00145059	24.1148
rs8053158	A	G	-0.0740543	0.0085	0.0103	0.0159151	5.89806e-06	0.4088	17397	genus.Ruminiclostridium5.id.11355	FT4	0.00124299	21.6487
rs12740451	T	C	0.0697527	-0.0006	0.0103	0.0153607	7.34264e-06	0.9501	17837	genus.Roseburia.id.2012	FT4	0.00115471	20.6181
rs147990086	A	G	-0.0578936	0.0006	0.0079	0.01324	8.92942e-06	0.9361	17840	genus.Roseburia.id.2012	FT4	0.0010706	19.1178
rs16910295	T	C	-0.0980434	-0.031	0.0129	0.020957	2.91111e-06	0.01623	16648	genus.Roseburia.id.2012	FT4	0.00131295	21.884
rs2160994	T	C	0.0550687	0.0091	0.0071	0.0112481	9.6985e-07	0.2009	17444	genus.Roseburia.id.2012	FT4	0.00137217	23.9663
rs2943022	T	C	0.0493786	-0.0088	0.0066	0.0106763	4.11408e-06	0.1833	17854	genus.Roseburia.id.2012	FT4	0.00119668	21.3887
rs302266	T	C	-0.0777312	-0.0137	0.0106	0.0172985	8.12587e-06	0.1932	17056	genus.Roseburia.id.2012	FT4	0.00118245	20.1893
rs329182	T	C	0.0690327	0.0011	0.0095	0.0152884	5.90142e-06	0.9073	17854	genus.Roseburia.id.2012	FT4	0.00114065	20.3862
rs55858165	A	C	0.179284	-0.0286	0.0179	0.0404954	9.98975e-06	0.1112	5447	genus.Roseburia.id.2012	FT4	0.00358555	19.5936
rs57466170	C	T	0.0741405	-0.0004	0.0119	0.0171601	8.30102e-06	0.9718	17333	genus.Roseburia.id.2012	FT4	0.0010758	18.6647
rs6445851	G	A	-0.0497336	0.0042	0.0066	0.0108158	3.52721e-06	0.526	17851	genus.Roseburia.id.2012	FT4	0.00118305	21.1413
rs6930661	C	T	-0.0961587	-0.0009	0.0126	0.0204975	2.47942e-06	0.9427	16945	genus.Roseburia.id.2012	FT4	0.00129709	22.0052
rs75326254	C	T	-0.104628	-0.0188	0.0143	0.0230897	7.50204e-06	0.1868	15893	genus.Roseburia.id.2012	FT4	0.0012903	20.5307
rs78753150	A	C	0.0968739	0.0034	0.0143	0.0214067	9.98312e-06	0.8102	16303	genus.Roseburia.id.2012	FT4	0.00125459	20.4768
rs9300744	C	T	-0.0588452	-0.0008	0.0076	0.0126228	4.75118e-06	0.9174	17854	genus.Roseburia.id.2012	FT4	0.00121576	21.7301
rs10279978	A	G	-0.0622202	0.0105	0.008	0.0127675	1.17009e-06	0.1907	14143	genus.Romboutsia.id.11347	FT4	0.0016764	23.7458
rs11221428	T	C	-0.0726779	0.0017	0.0086	0.0158263	6.48646e-06	0.8436	14187	genus.Romboutsia.id.11347	FT4	0.00148426	21.0855
rs16843578	C	T	-0.0875276	0.0041	0.0111	0.0196779	5.08123e-06	0.7102	14186	genus.Romboutsia.id.11347	FT4	0.00139274	19.7821
rs28603357	T	C	-0.214911	-0.0104	0.0175	0.0474739	8.52235e-06	0.5538	3693	genus.Romboutsia.id.11347	FT4	0.00551854	20.482
rs34302036	A	G	0.0550261	0.0058	0.0066	0.0120835	5.87667e-06	0.3781	14185	genus.Romboutsia.id.11347	FT4	0.00145979	20.7345
rs61841503	G	A	0.092888	-0.0038	0.0089	0.0171454	3.99597e-08	0.6715	13568	genus.Romboutsia.id.11347	FT4	0.00215859	29.3467
rs62504452	A	G	-0.0710048	-0.015	0.0091	0.0156654	4.65831e-06	0.1006	14178	genus.Romboutsia.id.11347	FT4	0.00144693	20.5414
rs7109293	A	G	0.0919112	-0.029	0.0142	0.0205738	6.98354e-06	0.04086	14141	genus.Romboutsia.id.11347	FT4	0.00140933	19.9547
rs75200530	T	G	-0.190644	0.0291	0.0163	0.0421065	5.06555e-06	0.07397	5246	genus.Romboutsia.id.11347	FT4	0.00389249	20.492
rs75987356	G	A	-0.129578	0.0183	0.0176	0.0280454	6.70799e-06	0.2976	10466	genus.Romboutsia.id.11347	FT4	0.00203552	21.3431
rs77702691	A	G	-0.094406	-0.0311	0.0124	0.0208544	7.36973e-06	0.01239	12487	genus.Romboutsia.id.11347	FT4	0.00163844	20.4895
rs9389266	T	G	0.0722815	-0.0092	0.0092	0.0162353	9.38461e-06	0.3182	14187	genus.Romboutsia.id.11347	FT4	0.00139519	19.8185
rs9567264	C	T	0.0580018	-0.0036	0.007	0.0127495	5.75689e-06	0.6087	14180	genus.Romboutsia.id.11347	FT4	0.00145743	20.6937
rs12501673	A	G	0.116395	-0.0065	0.0075	0.0262253	6.28983e-06	0.3869	3334	genus.RikenellaceaeRC9gutgroup.id.11191	FT4	0.00587361	19.6865
rs17032291	T	C	-0.169579	-0.0122	0.0102	0.0368251	6.61004e-06	0.2343	3206	genus.RikenellaceaeRC9gutgroup.id.11191	FT4	0.00657093	21.1925
rs17582787	A	G	-0.157739	-0.0063	0.0093	0.0339924	3.55377e-06	0.5033	3320	genus.RikenellaceaeRC9gutgroup.id.11191	FT4	0.00644421	21.5206
rs2074881	T	C	-0.142236	-0.0006	0.0103	0.032391	9.44772e-06	0.9525	3315	genus.RikenellaceaeRC9gutgroup.id.11191	FT4	0.0057832	19.2712
rs2900503	G	T	-0.172329	-0.0208	0.0087	0.0326671	1.55282e-07	0.01736	3320	genus.RikenellaceaeRC9gutgroup.id.11191	FT4	0.00831251	27.8121
rs2998141	T	C	-0.136346	0.0002	0.009	0.0293073	4.42373e-06	0.9833	3330	genus.RikenellaceaeRC9gutgroup.id.11191	FT4	0.00645772	21.631
rs4270579	G	A	-0.118021	0.0051	0.0074	0.0271041	5.45647e-06	0.4923	3331	genus.RikenellaceaeRC9gutgroup.id.11191	FT4	0.00565992	18.9491
rs7712231	A	G	0.156284	0.0007	0.0092	0.0350462	7.97036e-06	0.9418	3334	genus.RikenellaceaeRC9gutgroup.id.11191	FT4	0.00592923	19.874
rs80309088	G	A	0.17405	-0.0011	0.01	0.0383423	4.55642e-06	0.9117	3170	genus.RikenellaceaeRC9gutgroup.id.11191	FT4	0.0064583	20.5929
rs9887954	G	A	-0.114849	0.0021	0.0068	0.0249013	4.80801e-06	0.7567	3330	genus.RikenellaceaeRC9gutgroup.id.11191	FT4	0.00634752	21.2595
rs11685699	C	T	-0.141357	0.0054	0.013	0.0295665	2.02552e-06	0.6786	8342	genus.Prevotella9.id.11183	FT4	0.00273262	22.8525
rs117271932	A	G	0.208089	-0.0394	0.0163	0.0440393	2.81722e-06	0.01541	4878	genus.Prevotella9.id.11183	FT4	0.00455608	22.3171
rs12648235	T	C	0.0785902	-0.0002	0.0099	0.0177676	7.39079e-06	0.9818	10271	genus.Prevotella9.id.11183	FT4	0.00190126	19.5613
rs1304512	G	A	0.0761593	-0.0066	0.0082	0.0165885	5.29082e-06	0.4223	9790	genus.Prevotella9.id.11183	FT4	0.00214841	21.0739
rs2104588	T	C	0.105558	-0.0035	0.0101	0.023773	8.12987e-06	0.733	9268	genus.Prevotella9.id.11183	FT4	0.0021228	19.7117
rs2495052	A	G	0.0838978	0.0022	0.0101	0.0188523	8.97142e-06	0.8296	9790	genus.Prevotella9.id.11183	FT4	0.00201889	19.8008
rs2683313	A	G	-0.0724576	0.0027	0.0071	0.0151603	1.68895e-06	0.7072	10260	genus.Prevotella9.id.11183	FT4	0.00222147	22.8386
rs4968431	G	T	0.0640113	0.0167	0.0075	0.0144162	8.58441e-06	0.02641	10271	genus.Prevotella9.id.11183	FT4	0.00191586	19.7118
rs7237249	C	T	-0.0823764	0.0101	0.0087	0.0182126	8.93303e-06	0.247	10271	genus.Prevotella9.id.11183	FT4	0.00198786	20.454
rs746764	T	C	-0.0915772	-0.0031	0.0086	0.0193245	2.03999e-06	0.7217	9385	genus.Prevotella9.id.11183	FT4	0.00238719	22.4526
rs7976209	T	C	-0.0870786	0.0082	0.0092	0.0197951	7.28343e-06	0.3747	10263	genus.Prevotella9.id.11183	FT4	0.00188199	19.3475
rs9428102	A	G	-0.0778845	-0.0065	0.0079	0.0176068	4.61734e-06	0.4125	10264	genus.Prevotella9.id.11183	FT4	0.00190281	19.5639
rs9613013	G	A	0.0917591	0.0204	0.0099	0.0202697	6.10415e-06	0.04027	9790	genus.Prevotella9.id.11183	FT4	0.00208888	20.4888
rs118038478	A	G	0.205676	0.0012	0.0129	0.0468917	7.85422e-06	0.9274	3295	genus.Prevotella7.id.11182	FT4	0.00580483	19.2269
rs12124567	A	G	-0.121281	0.0023	0.009	0.0275017	9.48982e-06	0.7987	3283	genus.Prevotella7.id.11182	FT4	0.00588887	19.4358
rs12195431	T	C	0.196528	0.012	0.0124	0.0442322	8.72818e-06	0.332	3489	genus.Prevotella7.id.11182	FT4	0.00562626	19.7298
rs2240542	C	T	0.12085	-0.0192	0.0078	0.0261776	4.84146e-06	0.01305	3489	genus.Prevotella7.id.11182	FT4	0.00607137	21.3002
rs2918132	C	T	-0.114648	0.0011	0.0083	0.0254916	6.42409e-06	0.8932	3318	genus.Prevotella7.id.11182	FT4	0.00605937	20.2153
rs430270	A	C	0.139155	0.0014	0.0083	0.0297055	2.86846e-06	0.8657	3318	genus.Prevotella7.id.11182	FT4	0.0065703	21.9312
rs57404562	C	A	0.155486	-0.0039	0.0088	0.0316057	6.21576e-07	0.6569	3487	genus.Prevotella7.id.11182	FT4	0.00689285	24.1883
rs79263163	A	C	-0.143982	-0.0075	0.0087	0.031501	7.51048e-06	0.3882	3489	genus.Prevotella7.id.11182	FT4	0.00595216	20.8795
rs9426434	T	C	-0.123657	-0.0032	0.008	0.0278514	9.71711e-06	0.6933	3318	genus.Prevotella7.id.11182	FT4	0.00590601	19.7007
rs9608249	A	G	-0.158213	-0.0049	0.0095	0.0336317	2.06687e-06	0.6084	3482	genus.Prevotella7.id.11182	FT4	0.00631551	22.1176
rs9959718	G	A	0.133012	0.0048	0.0075	0.0275361	1.90058e-06	0.5222	3489	genus.Prevotella7.id.11182	FT4	0.00664324	23.3199
rs11929846	T	C	-0.0697199	0.0111	0.0084	0.0157969	8.88416e-06	0.1828	11114	genus.Phascolarctobacterium.id.2168	FT4	0.0017496	19.4756
rs12618201	A	G	0.0641657	0.0086	0.007	0.0138202	3.37696e-06	0.2226	11113	genus.Phascolarctobacterium.id.2168	FT4	0.001936	21.5526
rs1264476	T	G	0.0767335	0.0102	0.0082	0.0166041	4.29567e-06	0.211	11104	genus.Phascolarctobacterium.id.2168	FT4	0.00191966	21.353
rs28525131	G	A	-0.118657	0.023	0.0133	0.0269048	8.22677e-06	0.08411	10457	genus.Phascolarctobacterium.id.2168	FT4	0.00185658	19.4466
rs56069061	G	A	-0.111306	0.0175	0.012	0.0230694	1.87174e-06	0.145	11007	genus.Phascolarctobacterium.id.2168	FT4	0.00211045	23.2746
rs56157888	A	C	0.0954864	0.0026	0.0098	0.0193976	1.08506e-06	0.7888	10031	genus.Phascolarctobacterium.id.2168	FT4	0.00240987	24.227
rs74540770	G	A	-0.121014	0.0148	0.0132	0.0258621	3.60275e-06	0.2633	9403	genus.Phascolarctobacterium.id.2168	FT4	0.00232312	21.8905
rs74847270	A	G	-0.104889	-0.0148	0.0128	0.0230998	5.73099e-06	0.2451	11098	genus.Phascolarctobacterium.id.2168	FT4	0.00185436	20.6142
rs75882962	T	C	0.0968661	0.0123	0.0095	0.0190575	3.18987e-07	0.1938	10710	genus.Phascolarctobacterium.id.2168	FT4	0.00240644	25.8303
rs7982713	G	A	0.0726922	0.0068	0.0084	0.0163201	9.72164e-06	0.4165	10710	genus.Phascolarctobacterium.id.2168	FT4	0.001849	19.8358
rs10031059	T	C	-0.121167	0.0111	0.0079	0.0225844	1.23637e-07	0.1628	5526	genus.Peptococcus.id.2037	FT4	0.0051818	28.7734
rs11001941	G	A	-0.195611	-0.0237	0.0133	0.0392217	1.32858e-06	0.07524	5607	genus.Peptococcus.id.2037	FT4	0.00441654	24.8645
rs12069354	C	T	0.16763	0.0105	0.0136	0.03795	9.28339e-06	0.4404	5352	genus.Peptococcus.id.2037	FT4	0.0036323	19.5036
rs2054133	G	A	0.0895433	0.006	0.0072	0.0188332	2.14166e-06	0.409	5657	genus.Peptococcus.id.2037	FT4	0.00398017	22.5978
rs36121075	A	G	-0.14067	0.012	0.0112	0.030628	6.9872e-06	0.2858	5301	genus.Peptococcus.id.2037	FT4	0.00396355	21.0864
rs413827	G	A	0.110229	-0.0039	0.0082	0.0237523	3.30085e-06	0.6381	5482	genus.Peptococcus.id.2037	FT4	0.00391328	21.529
rs5770862	T	C	0.162018	-0.0079	0.0138	0.0356813	3.21957e-06	0.5664	5431	genus.Peptococcus.id.2037	FT4	0.00378197	20.6103
rs6918730	G	A	0.135311	0.0324	0.0103	0.0289742	1.14732e-06	0.00169	5656	genus.Peptococcus.id.2037	FT4	0.00384114	21.8015
rs7033353	T	G	0.090152	0.0034	0.0066	0.018995	2.21957e-06	0.6136	5657	genus.Peptococcus.id.2037	FT4	0.00396606	22.5174
rs72850165	T	C	-0.134304	-0.0082	0.0132	0.0300423	5.74152e-06	0.5351	5627	genus.Peptococcus.id.2037	FT4	0.00353911	19.9782
rs74592222	G	A	0.137957	-0.0103	0.0108	0.0302965	8.55342e-06	0.337	5329	genus.Peptococcus.id.2037	FT4	0.00387588	20.7272
rs77681628	C	T	0.200307	0.0033	0.0145	0.0387328	2.68836e-07	0.8221	4842	genus.Peptococcus.id.2037	FT4	0.00549312	26.7336
rs10899911	A	G	-0.0717102	-0.0066	0.0073	0.0148151	1.15272e-06	0.3632	11386	genus.Parasutterella.id.2892	FT4	0.00205346	23.4247
rs11715853	G	A	-0.0662952	0.0014	0.0071	0.0146114	6.22913e-06	0.8435	11386	genus.Parasutterella.id.2892	FT4	0.00180478	20.5828
rs2090816	A	C	0.0840967	-0.0058	0.0089	0.0177315	2.89715e-06	0.5169	11385	genus.Parasutterella.id.2892	FT4	0.00197187	22.4901
rs2387977	T	C	-0.0681778	-0.0045	0.0079	0.0134756	5.38476e-07	0.5704	11345	genus.Parasutterella.id.2892	FT4	0.00225117	25.5927
rs35055552	T	C	0.109554	-0.0071	0.0149	0.0235433	3.34853e-06	0.6358	9970	genus.Parasutterella.id.2892	FT4	0.00216714	21.649
rs55877868	A	C	-0.104458	-0.0006	0.012	0.0228089	2.87068e-06	0.961	10588	genus.Parasutterella.id.2892	FT4	0.00197696	20.9696
rs62273907	A	G	0.229468	0.0185	0.016	0.0502262	5.88384e-06	0.246	3691	genus.Parasutterella.id.2892	FT4	0.0056233	20.8617
rs6828768	C	T	0.0636852	-0.0058	0.0069	0.0132645	1.78328e-06	0.401	11386	genus.Parasutterella.id.2892	FT4	0.00202043	23.0472
rs7303158	C	T	0.0646859	0.0009	0.0065	0.0134256	1.32776e-06	0.8939	11386	genus.Parasutterella.id.2892	FT4	0.00203468	23.2101
rs7311004	T	C	-0.0617522	-0.006	0.0067	0.0136438	5.92054e-06	0.364	11384	genus.Parasutterella.id.2892	FT4	0.00179621	20.4812
rs7572229	G	A	0.066273	-0.0073	0.0069	0.0132736	6.31698e-07	0.2905	11383	genus.Parasutterella.id.2892	FT4	0.00218519	24.9242
rs78383039	T	C	-0.146315	0.007	0.0145	0.0297119	1.57438e-06	0.6292	9174	genus.Parasutterella.id.2892	FT4	0.00263638	24.2448
rs8039785	T	G	0.0618345	-0.0142	0.0066	0.0133	3.62095e-06	0.03221	11383	genus.Parasutterella.id.2892	FT4	0.00189529	21.6113
rs823424	G	A	-0.0713448	-0.0038	0.0081	0.0156958	4.95295e-06	0.6343	11386	genus.Parasutterella.id.2892	FT4	0.00181133	20.6576
rs10842464	T	C	-0.0758215	0.0053	0.0065	0.0172568	6.59715e-06	0.4141	7178	genus.Paraprevotella.id.962	FT4	0.00268223	19.2994
rs140997932	T	C	-0.162376	0.008	0.0143	0.0354178	2.11119e-06	0.5765	6187	genus.Paraprevotella.id.962	FT4	0.00338567	21.0115
rs145020347	A	G	-0.12465	-0.0082	0.0118	0.0262323	4.03009e-06	0.4863	6859	genus.Paraprevotella.id.962	FT4	0.00328112	22.5727
rs17109926	A	G	-0.0988335	0.0044	0.0086	0.0216172	6.75279e-06	0.613	7179	genus.Paraprevotella.id.962	FT4	0.00290325	20.8973
rs17785622	A	G	0.248065	0.028	0.0162	0.0524304	1.92659e-06	0.08348	3288	genus.Paraprevotella.id.962	FT4	0.00676219	22.3718
rs2081023	A	G	-0.122561	0.0139	0.0105	0.0236507	2.638e-07	0.1862	7178	genus.Paraprevotella.id.962	FT4	0.00372725	26.8468
rs3008582	T	C	0.10572	-0.0097	0.0093	0.0227246	4.35989e-06	0.2996	7175	genus.Paraprevotella.id.962	FT4	0.00300742	21.6373
rs3801748	G	A	0.0779721	0.0036	0.0067	0.0171691	5.20177e-06	0.5953	7179	genus.Paraprevotella.id.962	FT4	0.00286465	20.6187
rs4756632	G	T	-0.138905	0.0016	0.0116	0.0289897	3.81747e-06	0.89	7179	genus.Paraprevotella.id.962	FT4	0.00318787	22.9525
rs4767113	C	T	0.0882466	-0.0026	0.0073	0.018382	2.14357e-06	0.7209	6900	genus.Paraprevotella.id.962	FT4	0.00332901	23.0402
rs7240324	T	G	-0.10229	-0.0003	0.0097	0.0226948	5.95902e-06	0.9763	6900	genus.Paraprevotella.id.962	FT4	0.00293556	20.3091
rs9602779	A	C	-0.106692	0.0192	0.0084	0.0220263	6.92746e-07	0.02251	7177	genus.Paraprevotella.id.962	FT4	0.00325849	23.4561
rs9900242	A	G	-0.0852967	-0.0041	0.0067	0.0175212	1.14068e-06	0.5451	6900	genus.Paraprevotella.id.962	FT4	0.00342294	23.6926
rs114567323	T	C	0.186478	-0.0029	0.0164	0.0405199	5.65487e-06	0.8594	5859	genus.Parabacteroides.id.954	FT4	0.00360185	21.1723
rs115602804	G	A	0.10308	0.0261	0.0142	0.0222736	1.93059e-06	0.0667	16394	genus.Parabacteroides.id.954	FT4	0.00130472	21.4149
rs4236095	G	A	0.0761961	0.0013	0.0093	0.0157042	1.93145e-06	0.8924	16383	genus.Parabacteroides.id.954	FT4	0.00143489	23.5387
rs60884758	C	T	-0.0702667	-0.0047	0.0087	0.0142249	5.70689e-07	0.5866	17293	genus.Parabacteroides.id.954	FT4	0.00140902	24.3978
rs6657302	T	C	-0.10452	0.0314	0.0137	0.0225521	9.75699e-06	0.02183	16552	genus.Parabacteroides.id.954	FT4	0.00129601	21.4768
rs7298818	C	T	0.0888832	0.0042	0.0115	0.0200902	8.53629e-06	0.7126	16510	genus.Parabacteroides.id.954	FT4	0.00118416	19.5712
rs10464997	G	A	0.137691	-0.019	0.0104	0.0294804	3.29754e-06	0.06704	4650	genus.Oxalobacter.id.2978	FT4	0.00466939	21.8051
rs11108500	A	G	-0.199099	0.0075	0.015	0.0427327	3.74279e-06	0.6168	4303	genus.Oxalobacter.id.2978	FT4	0.00501952	21.6979
rs111966731	T	C	0.213114	0.0058	0.0152	0.047162	7.29863e-06	0.7026	3931	genus.Oxalobacter.id.2978	FT4	0.00516759	20.4089
rs12002250	A	C	0.217122	0.0162	0.0146	0.0466317	1.41504e-06	0.2652	4297	genus.Oxalobacter.id.2978	FT4	0.0050199	21.6693
rs1569853	T	C	-0.138078	-0.006	0.009	0.0296981	3.64501e-06	0.5017	4492	genus.Oxalobacter.id.2978	FT4	0.0047892	21.607
rs36057338	G	T	0.207847	0.021	0.0133	0.0421439	8.79803e-07	0.1155	4244	genus.Oxalobacter.id.2978	FT4	0.0056985	24.3116
rs3862635	C	T	-0.172142	0.0015	0.0124	0.0394026	9.18685e-06	0.9061	4469	genus.Oxalobacter.id.2978	FT4	0.00425268	19.0778
rs4428215	G	A	0.130293	-0.0038	0.0076	0.0242237	7.51071e-08	0.6224	4655	genus.Oxalobacter.id.2978	FT4	0.00617658	28.9183
rs6000536	C	T	-0.130992	-0.0019	0.0083	0.0253804	2.06054e-07	0.821	4654	genus.Oxalobacter.id.2978	FT4	0.00569099	26.626
rs6993398	G	A	0.127217	0.0103	0.0091	0.0278855	7.12773e-06	0.2546	4656	genus.Oxalobacter.id.2978	FT4	0.00445026	20.8041
rs736744	C	T	0.117882	0.0055	0.0067	0.0211262	2.57471e-08	0.4137	4655	genus.Oxalobacter.id.2978	FT4	0.0066441	31.1218
rs12206468	G	A	-0.133016	-0.0044	0.0124	0.0269733	1.04222e-06	0.7226	9554	genus.Oscillospira.id.2064	FT4	0.00253891	24.3134
rs12925026	T	C	0.13559	-0.0204	0.0137	0.030678	9.31021e-06	0.1371	8200	genus.Oscillospira.id.2064	FT4	0.0023766	19.5297
rs1954532	T	C	-0.0826246	-0.0055	0.009	0.0175252	2.26773e-06	0.5405	9841	genus.Oscillospira.id.2064	FT4	0.00225359	22.2232
rs28889936	A	C	0.114051	-0.0053	0.0116	0.0252838	3.36585e-06	0.6465	9758	genus.Oscillospira.id.2064	FT4	0.00208088	20.3433
rs72866977	A	C	-0.130569	-0.0207	0.0153	0.0281674	5.62701e-06	0.1745	9098	genus.Oscillospira.id.2064	FT4	0.00235622	21.4828
rs751183	T	C	-0.0774322	-0.0052	0.0081	0.0172216	6.85127e-06	0.5163	9841	genus.Oscillospira.id.2064	FT4	0.00205007	20.2121
rs8076323	A	G	0.0715392	0.0028	0.0073	0.0156539	5.61316e-06	0.6979	10193	genus.Oscillospira.id.2064	FT4	0.00204481	20.8814
rs11627628	T	C	0.143961	-0.0058	0.0118	0.0290223	1.0092e-06	0.6233	8486	genus.Oscillibacter.id.2063	FT4	0.0028911	24.5992
rs11990279	T	C	-0.0824934	-0.0048	0.0076	0.0180457	4.94298e-06	0.5329	8528	genus.Oscillibacter.id.2063	FT4	0.00244444	20.8923
rs12649930	T	G	0.121589	-0.0006	0.0114	0.0259612	4.09379e-06	0.9579	8794	genus.Oscillibacter.id.2063	FT4	0.00248811	21.93
rs133832	A	C	-0.0795527	-0.0002	0.0074	0.0162411	1.14719e-06	0.9738	8926	genus.Oscillibacter.id.2063	FT4	0.00268076	23.9874
rs16866406	A	G	0.0988765	0.0012	0.0098	0.0208795	3.07821e-06	0.9047	8930	genus.Oscillibacter.id.2063	FT4	0.00250498	22.4206
rs16934185	A	G	-0.129568	-0.0036	0.0117	0.028157	4.38031e-06	0.7564	8492	genus.Oscillibacter.id.2063	FT4	0.0024873	21.1698
rs234108	A	G	0.0749553	0.0073	0.0066	0.0152632	9.16336e-07	0.2668	8694	genus.Oscillibacter.id.2063	FT4	0.00276624	24.1109
rs36095275	C	T	-0.0752368	0.0071	0.007	0.0156861	1.39627e-06	0.3053	8694	genus.Oscillibacter.id.2063	FT4	0.00263914	23.0001
rs4506202	A	G	-0.0711323	-0.0062	0.0065	0.0152261	3.20825e-06	0.3404	8694	genus.Oscillibacter.id.2063	FT4	0.00250408	21.8201
rs61883564	A	G	-0.101351	-0.0071	0.0095	0.0221016	3.38712e-06	0.453	8930	genus.Oscillibacter.id.2063	FT4	0.00234931	21.024
rs62206502	C	A	-0.0681423	0.0006	0.0067	0.0151349	6.59895e-06	0.9327	8883	genus.Oscillibacter.id.2063	FT4	0.0022768	20.2664
rs75453768	G	T	0.12212	-0.0145	0.014	0.0268629	5.34738e-06	0.2994	8256	genus.Oscillibacter.id.2063	FT4	0.00249696	20.6615
rs761240	T	G	-0.17664	0.0145	0.018	0.0388812	2.03841e-06	0.4221	5185	genus.Oscillibacter.id.2063	FT4	0.00396481	20.6314
rs9393920	A	G	-0.0744662	0.0135	0.0074	0.0151081	9.92237e-07	0.06968	8930	genus.Oscillibacter.id.2063	FT4	0.00271311	24.2885
rs1035588	A	G	-0.108148	-0.0059	0.0071	0.0236848	4.85501e-06	0.4026	3739	genus.Olsenella.id.822	FT4	0.00554536	20.8386
rs17148768	G	A	0.140434	0.006	0.0084	0.0295602	2.1984e-06	0.4775	3648	genus.Olsenella.id.822	FT4	0.00614891	22.5576
rs2759329	G	A	-0.111131	-0.0049	0.0066	0.0237218	3.43201e-06	0.4576	3739	genus.Olsenella.id.822	FT4	0.00583552	21.9353
rs35225860	A	G	-0.223604	0.0089	0.0172	0.0482391	3.87041e-06	0.6054	3630	genus.Olsenella.id.822	FT4	0.00588422	21.4743
rs6046522	C	T	0.122938	-0.0003	0.0076	0.0269928	4.48455e-06	0.9734	3705	genus.Olsenella.id.822	FT4	0.00556758	20.7322
rs61090148	A	G	-0.104783	0.0075	0.0069	0.0231343	6.43728e-06	0.2766	3739	genus.Olsenella.id.822	FT4	0.00545678	20.5039
rs62112538	C	T	-0.19943	-0.0137	0.0142	0.0407033	1.1882e-06	0.3337	3630	genus.Olsenella.id.822	FT4	0.00656984	23.993
rs72691585	C	A	-0.249079	-0.0106	0.0153	0.0520814	2.95294e-06	0.4878	3078	genus.Olsenella.id.822	FT4	0.00737606	22.8573
rs7540303	C	T	0.108044	-0.0124	0.0066	0.023638	5.32027e-06	0.05893	3739	genus.Olsenella.id.822	FT4	0.00555654	20.8808
rs8066522	G	A	-0.106529	-0.0054	0.0068	0.0240379	9.70095e-06	0.424	3739	genus.Olsenella.id.822	FT4	0.00522528	19.6295
rs9460691	C	A	0.119966	-0.0198	0.0081	0.0268645	7.28354e-06	0.01416	3739	genus.Olsenella.id.822	FT4	0.00530508	19.9308
rs10093869	A	G	-0.0577795	0.0087	0.0071	0.0125389	3.67441e-06	0.2227	14218	genus.Odoribacter.id.952	FT4	0.00149121	21.2308
rs10423795	C	T	0.0550695	-0.0091	0.0075	0.0121164	6.57936e-06	0.224	14135	genus.Odoribacter.id.952	FT4	0.0014593	20.6544
rs28417404	A	G	-0.0726896	-0.0093	0.01	0.0161372	3.68032e-06	0.3537	14698	genus.Odoribacter.id.952	FT4	0.00137858	20.2876
rs4793970	A	G	-0.0576329	-0.0001	0.0073	0.0129154	6.02696e-06	0.9898	14687	genus.Odoribacter.id.952	FT4	0.00135395	19.9098
rs6856150	G	A	0.0881922	0.0128	0.012	0.0194146	6.0595e-06	0.2877	14597	genus.Odoribacter.id.952	FT4	0.00141164	20.6321
rs74553962	T	G	0.121449	0.0115	0.0154	0.0264106	9.48684e-06	0.4565	11803	genus.Odoribacter.id.952	FT4	0.00178839	21.1426
rs77779484	G	A	-0.133489	0.0018	0.0132	0.0268526	6.56256e-07	0.889	11935	genus.Odoribacter.id.952	FT4	0.00206633	24.7086
rs10202904	T	G	-0.112811	-0.006	0.0069	0.0239106	3.08549e-06	0.3811	3583	genus.Methanobrevibacter.id.123	FT4	0.00617426	22.2474
rs1334944	T	C	0.115197	-0.0106	0.007	0.0255492	7.6138e-06	0.132	3586	genus.Methanobrevibacter.id.123	FT4	0.00563712	20.318
rs4802933	A	G	-0.135628	0.0126	0.0097	0.0308139	9.73818e-06	0.1969	3586	genus.Methanobrevibacter.id.123	FT4	0.00537352	19.3627
rs6776814	T	C	-0.188956	-0.0077	0.011	0.0419905	8.04905e-06	0.4806	3283	genus.Methanobrevibacter.id.123	FT4	0.00613025	20.2374
rs76029318	T	C	0.222849	-0.0032	0.0125	0.0454319	1.07552e-06	0.7967	3387	genus.Methanobrevibacter.id.123	FT4	0.00705357	24.0459
rs894996	C	A	0.214213	0.0001	0.0123	0.0456045	3.81567e-06	0.991	3479	genus.Methanobrevibacter.id.123	FT4	0.00630195	22.0509
rs11620597	T	C	0.119479	-0.0088	0.0125	0.0271688	7.80178e-06	0.4786	11031	genus.Marvinbryantia.id.2005	FT4	0.00175013	19.336
rs1187983	C	T	-0.0935456	0.0007	0.0099	0.0193174	2.02427e-06	0.9456	11896	genus.Marvinbryantia.id.2005	FT4	0.00196739	23.4463
rs146541147	G	A	0.118845	0.0196	0.0147	0.0268423	6.86288e-06	0.183	10778	genus.Marvinbryantia.id.2005	FT4	0.00181551	19.5995
rs2724813	A	G	-0.0840769	-0.0006	0.0084	0.0167551	6.28451e-07	0.9411	11610	genus.Marvinbryantia.id.2005	FT4	0.00216415	25.1759
rs2842896	C	T	-0.0649396	0.002	0.0068	0.0131146	7.25363e-07	0.77	11709	genus.Marvinbryantia.id.2005	FT4	0.00208967	24.515
rs2863363	A	G	0.0634861	0.0038	0.0068	0.0136323	3.11281e-06	0.5791	11950	genus.Marvinbryantia.id.2005	FT4	0.00181161	21.6844
rs3125832	A	C	0.0679323	0.0121	0.0077	0.015012	5.02731e-06	0.1176	11709	genus.Marvinbryantia.id.2005	FT4	0.00174581	20.4739
rs61884471	G	A	0.124426	-0.0046	0.0125	0.0248431	1.01163e-06	0.7138	11559	genus.Marvinbryantia.id.2005	FT4	0.00216546	25.0806
rs72948274	A	C	-0.126354	-0.0113	0.0153	0.0272212	3.2591e-06	0.4626	11561	genus.Marvinbryantia.id.2005	FT4	0.0018602	21.5421
rs8006832	G	T	-0.0952415	-0.0193	0.0108	0.0216699	6.58083e-06	0.07334	11412	genus.Marvinbryantia.id.2005	FT4	0.00168983	19.3136
rs10417872	T	G	0.118306	0.0069	0.0074	0.024522	1.28678e-06	0.3506	4056	genus.Lactococcus.id.1851	FT4	0.00570582	23.2641
rs123059	T	C	-0.13671	0.0011	0.0081	0.0274694	1.26562e-06	0.8878	3760	genus.Lactococcus.id.1851	FT4	0.00654429	24.7555
rs12621813	G	A	0.108423	-0.0042	0.0074	0.0239978	6.60829e-06	0.5745	4057	genus.Lactococcus.id.1851	FT4	0.00500624	20.4025
rs17168302	G	A	0.191857	-0.0189	0.0144	0.0424761	6.28602e-06	0.1911	4023	genus.Lactococcus.id.1851	FT4	0.00504565	20.3915
rs2293361	C	T	-0.199221	-0.0061	0.0138	0.0430969	1.39593e-06	0.6605	3787	genus.Lactococcus.id.1851	FT4	0.00561099	21.3574
rs4766997	C	T	0.114599	-0.0015	0.0072	0.023839	2.06145e-06	0.8396	4053	genus.Lactococcus.id.1851	FT4	0.00566945	23.0979
rs55910161	C	T	0.146426	0.0136	0.0091	0.0307367	2.36214e-06	0.1339	3836	genus.Lactococcus.id.1851	FT4	0.00588141	22.6827
rs6674304	C	T	0.200758	0.0003	0.013	0.0442121	6.17759e-06	0.9804	3869	genus.Lactococcus.id.1851	FT4	0.00530096	20.608
rs7992246	T	C	0.104232	0.0121	0.0071	0.0230786	4.44724e-06	0.08714	4057	genus.Lactococcus.id.1851	FT4	0.00500264	20.3877
rs11674854	C	T	-0.0852686	-0.0072	0.0075	0.0176504	1.592e-06	0.335	6655	genus.Lactobacillus.id.1837	FT4	0.00349464	23.3314
rs12693845	C	T	-0.0805447	0.011	0.008	0.0177429	8.9632e-06	0.1726	6958	genus.Lactobacillus.id.1837	FT4	0.00295296	20.6016
rs1530559	G	A	0.0804001	-0.0326	0.0078	0.0178207	4.93109e-06	2.999e-05	6655	genus.Lactobacillus.id.1837	FT4	0.00304921	20.3484
rs16861661	G	A	-0.183147	0.0254	0.0141	0.038148	1.2781e-06	0.07063	5325	genus.Lactobacillus.id.1837	FT4	0.00430983	23.0405
rs62314653	C	A	0.187692	-0.0113	0.0147	0.0394585	2.24383e-06	0.4418	5944	genus.Lactobacillus.id.1837	FT4	0.00379212	22.6185
rs7399658	G	A	-0.107134	0.0036	0.0085	0.0221883	3.12099e-06	0.6717	6613	genus.Lactobacillus.id.1837	FT4	0.003513	23.3063
rs75127669	C	A	0.139784	0	0.012	0.0310414	6.83434e-06	0.9968	6840	genus.Lactobacillus.id.1837	FT4	0.00295591	20.2724
rs768253	T	G	-0.079195	0.003	0.0066	0.0171791	4.2477e-06	0.649	6958	genus.Lactobacillus.id.1837	FT4	0.00304499	21.2456
rs921925	A	C	0.0985077	-0.011	0.008	0.0203229	9.71665e-07	0.1696	6952	genus.Lactobacillus.id.1837	FT4	0.00336817	23.4879
rs11192447	A	G	0.126592	-0.0085	0.0141	0.024345	4.68957e-07	0.5469	12695	genus.LachnospiraceaeUCG010.id.11330	FT4	0.00212538	27.0349
rs12346653	C	T	0.0657686	-0.0047	0.0075	0.0139569	2.70321e-06	0.5274	12816	genus.LachnospiraceaeUCG010.id.11330	FT4	0.00172963	22.2019
rs17730011	G	A	-0.0702357	-0.0069	0.0087	0.015706	7.84597e-06	0.4272	13226	genus.LachnospiraceaeUCG010.id.11330	FT4	0.00150973	19.9948
rs2833528	C	T	-0.0562148	-0.0149	0.0068	0.0127763	9.9199e-06	0.02918	13233	genus.LachnospiraceaeUCG010.id.11330	FT4	0.00146082	19.3564
rs336138	G	T	0.0779543	0.0052	0.009	0.0171865	7.48417e-06	0.5655	13236	genus.LachnospiraceaeUCG010.id.11330	FT4	0.00155193	20.5701
rs4576377	A	C	-0.0572001	0.0026	0.0068	0.0127043	7.63056e-06	0.7045	13225	genus.LachnospiraceaeUCG010.id.11330	FT4	0.00153049	20.2687
rs72894957	G	A	0.222263	-0.0003	0.0156	0.0486425	5.68428e-06	0.9832	4316	genus.LachnospiraceaeUCG010.id.11330	FT4	0.00481421	20.869
rs74315802	G	T	0.0867262	0.0122	0.0137	0.0183477	3.19006e-06	0.3733	12715	genus.LachnospiraceaeUCG010.id.11330	FT4	0.00175412	22.3393
rs9981767	A	C	0.0655062	-0.0015	0.0071	0.0131994	9.96373e-07	0.8286	12816	genus.LachnospiraceaeUCG010.id.11330	FT4	0.00191809	24.6256
rs10741777	T	C	-0.0973842	-0.0016	0.008	0.0194791	7.68659e-07	0.8401	7014	genus.LachnospiraceaeUCG008.id.11328	FT4	0.00355081	24.987
rs10793103	C	T	0.0974344	0.0019	0.0073	0.0181279	9.34937e-08	0.7982	7014	genus.LachnospiraceaeUCG008.id.11328	FT4	0.00410183	28.8805
rs10801803	G	A	-0.117029	-0.0074	0.0095	0.0243085	1.40029e-06	0.4354	7017	genus.LachnospiraceaeUCG008.id.11328	FT4	0.00329222	23.1712
rs13024781	T	C	-0.0798769	-0.0017	0.0068	0.0168846	2.29166e-06	0.8047	7016	genus.LachnospiraceaeUCG008.id.11328	FT4	0.00317973	22.3738
rs57091572	A	G	-0.110443	0.0115	0.0094	0.0235801	2.85822e-06	0.2174	6950	genus.LachnospiraceaeUCG008.id.11328	FT4	0.0031465	21.9309
rs57254474	G	A	0.0886512	0.0103	0.0081	0.0199045	6.92061e-06	0.2056	7017	genus.LachnospiraceaeUCG008.id.11328	FT4	0.00281896	19.8309
rs61944774	A	G	0.179838	-0.0188	0.0161	0.0393797	6.34122e-06	0.2436	6000	genus.LachnospiraceaeUCG008.id.11328	FT4	0.00346385	20.8484
rs62277846	C	T	0.102292	-0.0184	0.009	0.0212319	1.58892e-06	0.04084	7016	genus.LachnospiraceaeUCG008.id.11328	FT4	0.00329751	23.2052
rs67078837	T	C	-0.0845848	-0.0012	0.0067	0.0170693	7.68189e-07	0.853	7016	genus.LachnospiraceaeUCG008.id.11328	FT4	0.00348777	24.5489
rs75356640	G	A	0.136523	0.0252	0.0131	0.0303128	9.83206e-06	0.05442	6423	genus.LachnospiraceaeUCG008.id.11328	FT4	0.00314814	20.2781
rs955844	A	C	0.112064	0.0075	0.0092	0.0228369	1.80994e-06	0.4152	6863	genus.LachnospiraceaeUCG008.id.11328	FT4	0.00349641	24.0731
rs11128180	A	G	0.0648288	-0.0019	0.0081	0.0140126	4.51737e-06	0.8109	14466	genus.LachnospiraceaeUCG004.id.11324	FT4	0.00147743	21.4011
rs12072562	T	C	0.133104	0.0074	0.0144	0.0303566	7.0737e-06	0.6052	9176	genus.LachnospiraceaeUCG004.id.11324	FT4	0.0020908	19.2212
rs12673420	G	A	0.0554351	0.0031	0.0066	0.0118375	2.98079e-06	0.6403	14463	genus.LachnospiraceaeUCG004.id.11324	FT4	0.00151402	21.9274
rs12747809	G	A	-0.062197	-0.0086	0.007	0.0125685	8.64875e-07	0.2164	14464	genus.LachnospiraceaeUCG004.id.11324	FT4	0.00169025	24.4858
rs12894272	A	G	0.0579792	0.0018	0.0071	0.0125229	4.33949e-06	0.7943	14463	genus.LachnospiraceaeUCG004.id.11324	FT4	0.0014799	21.4326
rs233486	A	G	-0.0799088	0.0003	0.0097	0.017766	6.28457e-06	0.978	13710	genus.LachnospiraceaeUCG004.id.11324	FT4	0.00147344	20.2277
rs2444793	C	T	-0.0542433	0.01	0.0065	0.0118188	4.77076e-06	0.1253	14463	genus.LachnospiraceaeUCG004.id.11324	FT4	0.00145432	21.0615
rs2726805	A	G	0.0548397	-0.0002	0.0075	0.0120844	6.30399e-06	0.9762	14466	genus.LachnospiraceaeUCG004.id.11324	FT4	0.00142158	20.591
rs2882478	G	A	-0.0577091	0.0012	0.0069	0.0118338	1.20811e-06	0.8611	14466	genus.LachnospiraceaeUCG004.id.11324	FT4	0.00164125	23.7781
rs35182105	A	G	-0.109724	-0.0156	0.0143	0.024221	4.86508e-06	0.2757	13170	genus.LachnospiraceaeUCG004.id.11324	FT4	0.00155582	20.519
rs6656451	C	T	-0.05436	-0.0175	0.0066	0.011947	5.56781e-06	0.007648	14458	genus.LachnospiraceaeUCG004.id.11324	FT4	0.00142992	20.7005
rs7629954	A	G	0.108441	0.0219	0.0121	0.023825	5.77222e-06	0.07011	12568	genus.LachnospiraceaeUCG004.id.11324	FT4	0.00164566	20.7134
rs12131224	C	T	0.117095	0.005	0.0125	0.02591	7.39863e-06	0.6872	9676	genus.LachnospiraceaeUCG001.id.11321	FT4	0.00210637	20.42
rs2050911	G	A	0.0751466	0.0088	0.007	0.0153934	1.10648e-06	0.2116	10148	genus.LachnospiraceaeUCG001.id.11321	FT4	0.00234287	23.8266
rs2371284	T	C	-0.0761893	0.0105	0.0081	0.0170127	7.55967e-06	0.1938	9961	genus.LachnospiraceaeUCG001.id.11321	FT4	0.0020094	20.0519
rs437876	T	C	0.0784637	-0.0053	0.0071	0.0144768	7.1655e-08	0.4548	10150	genus.LachnospiraceaeUCG001.id.11321	FT4	0.00288584	29.3703
rs4981345	T	C	-0.0681973	0.0122	0.007	0.0149831	6.08596e-06	0.08089	9961	genus.LachnospiraceaeUCG001.id.11321	FT4	0.0020755	20.7129
rs573933	T	C	-0.107898	0.0129	0.011	0.0232346	3.10508e-06	0.2431	10150	genus.LachnospiraceaeUCG001.id.11321	FT4	0.00212017	21.5612
rs62496417	T	G	-0.0748504	0.0023	0.0078	0.0165681	5.87504e-06	0.7696	10150	genus.LachnospiraceaeUCG001.id.11321	FT4	0.00200681	20.4061
rs7341608	T	C	-0.0784757	0.0049	0.0081	0.0177648	9.48124e-06	0.5492	9917	genus.LachnospiraceaeUCG001.id.11321	FT4	0.00196389	19.5103
rs74034332	G	A	0.168045	0.012	0.0191	0.0382637	3.33351e-06	0.5309	6004	genus.LachnospiraceaeUCG001.id.11321	FT4	0.00320218	19.2813
rs78848836	A	G	-0.118868	0.013	0.0135	0.0259753	3.38171e-06	0.3347	9506	genus.LachnospiraceaeUCG001.id.11321	FT4	0.00219814	20.9371
rs9403580	C	T	0.107801	-0.0234	0.0109	0.0229777	3.46785e-06	0.03139	10095	genus.LachnospiraceaeUCG001.id.11321	FT4	0.00217558	22.006
rs985416	C	T	0.0970258	-0.0034	0.0082	0.0181807	1.45591e-07	0.6779	9917	genus.LachnospiraceaeUCG001.id.11321	FT4	0.0028637	28.4752
rs10952110	G	T	0.0487709	-0.0016	0.0067	0.0109614	9.08113e-06	0.8078	16764	genus.LachnospiraceaeNK4A136group.id.11319	FT4	0.00117949	19.794
rs11263806	A	G	-0.0524615	-0.005	0.0073	0.0116758	5.06517e-06	0.4932	17236	genus.LachnospiraceaeNK4A136group.id.11319	FT4	0.00116994	20.1864
rs12611395	A	G	-0.0902532	0.0132	0.0145	0.0199652	5.83039e-06	0.3611	16486	genus.LachnospiraceaeNK4A136group.id.11319	FT4	0.00123801	20.4326
rs160061	A	G	0.0513831	0.0038	0.0067	0.0108094	2.12198e-06	0.5726	17234	genus.LachnospiraceaeNK4A136group.id.11319	FT4	0.00130943	22.5936
rs28540839	A	C	0.0508285	-0.0015	0.0067	0.0110591	9.34319e-06	0.8222	16764	genus.LachnospiraceaeNK4A136group.id.11319	FT4	0.00125849	21.1214
rs2880566	T	C	0.0599578	-0.01	0.0082	0.0134693	5.61428e-06	0.2209	17232	genus.LachnospiraceaeNK4A136group.id.11319	FT4	0.0011486	19.8132
rs4955932	T	C	-0.0492283	-0.0003	0.0072	0.0109388	7.05426e-06	0.9721	17236	genus.LachnospiraceaeNK4A136group.id.11319	FT4	0.00117367	20.2508
rs59805249	T	C	0.0936162	0.0025	0.0139	0.0207982	9.45385e-06	0.8576	15195	genus.LachnospiraceaeNK4A136group.id.11319	FT4	0.00133159	20.2578
rs68104925	T	C	-0.0549104	-0.003	0.0068	0.0115385	2.36779e-06	0.6579	17227	genus.LachnospiraceaeNK4A136group.id.11319	FT4	0.00131289	22.6443
rs7073658	T	G	-0.0499621	0.0036	0.0067	0.0109693	5.2691e-06	0.5963	17236	genus.LachnospiraceaeNK4A136group.id.11319	FT4	0.00120217	20.7432
rs7616165	G	T	-0.230542	-0.0079	0.0165	0.0483465	2.77391e-06	0.6319	4094	genus.LachnospiraceaeNK4A136group.id.11319	FT4	0.00552354	22.7279
rs76193507	A	G	-0.22973	0.0138	0.0161	0.0499776	2.9309e-06	0.3887	3578	genus.LachnospiraceaeNK4A136group.id.11319	FT4	0.00587068	21.1175
rs7832116	A	G	-0.0714756	-0.0059	0.0092	0.0151703	3.57084e-06	0.5254	17219	genus.LachnospiraceaeNK4A136group.id.11319	FT4	0.00128754	22.1961
rs954878	A	G	-0.0520656	-0.0582	0.0065	0.0109082	1.78203e-06	4.825e-19	17227	genus.LachnospiraceaeNK4A136group.id.11319	FT4	0.00132072	22.7795
rs2861203	G	A	0.0572304	-0.0094	0.0078	0.0127279	7.36931e-06	0.2278	15305	genus.LachnospiraceaeND3007group.id.11317	FT4	0.00131927	20.2155
rs72776675	T	C	-0.0647067	-0.0156	0.0096	0.014797	8.71689e-06	0.1038	15302	genus.LachnospiraceaeND3007group.id.11317	FT4	0.00124813	19.1203
rs9932954	A	G	-0.0561864	-0.0175	0.0074	0.0115984	1.24882e-06	0.01859	15222	genus.LachnospiraceaeND3007group.id.11317	FT4	0.0015393	23.4643
rs117467633	T	C	-0.169687	0.0284	0.0172	0.0383169	9.13317e-06	0.0987	5077	genus.LachnospiraceaeNC2004group.id.11316	FT4	0.00384803	19.6042
rs12127733	G	A	0.115182	-0.0046	0.0084	0.0246006	3.10594e-06	0.5826	6226	genus.LachnospiraceaeNC2004group.id.11316	FT4	0.00350863	21.9146
rs12208226	C	A	-0.154739	-0.0014	0.0119	0.0340372	9.7484e-06	0.9058	5620	genus.LachnospiraceaeNC2004group.id.11316	FT4	0.00366405	20.6603
rs12863463	G	A	-0.156365	0.0065	0.0126	0.0345372	6.03984e-06	0.6037	5516	genus.LachnospiraceaeNC2004group.id.11316	FT4	0.00370229	20.4903
rs17067076	G	A	-0.154631	-0.0232	0.0152	0.0352194	5.61206e-06	0.1258	4449	genus.LachnospiraceaeNC2004group.id.11316	FT4	0.00431412	19.268
rs1928659	T	C	0.102522	0.0014	0.0078	0.0226445	6.17241e-06	0.8561	5516	genus.LachnospiraceaeNC2004group.id.11316	FT4	0.00370231	20.4904
rs1929743	T	C	0.0837206	0.0025	0.0069	0.0190318	9.0551e-06	0.7164	6330	genus.LachnospiraceaeNC2004group.id.11316	FT4	0.00304771	19.3449
rs3756315	A	G	-0.0883469	-0.0112	0.007	0.0188397	3.32583e-06	0.1088	6328	genus.LachnospiraceaeNC2004group.id.11316	FT4	0.00346308	21.9836
rs6116753	G	A	0.0994748	0.0027	0.0076	0.0209139	2.9225e-06	0.7242	6278	genus.LachnospiraceaeNC2004group.id.11316	FT4	0.00359064	22.616
rs10093861	G	A	-0.0568869	-0.0049	0.0065	0.0121152	3.05624e-06	0.4544	13772	genus.LachnospiraceaeFCS020group.id.11314	FT4	0.00159835	22.0445
rs1254846	G	A	0.105963	-0.0265	0.0121	0.0232501	5.59664e-06	0.02849	13172	genus.LachnospiraceaeFCS020group.id.11314	FT4	0.00157441	20.7677
rs1363769	T	C	-0.200628	0.0177	0.0165	0.0449372	1.58163e-06	0.2828	3555	genus.LachnospiraceaeFCS020group.id.11314	FT4	0.00557577	19.9218
rs2322265	C	T	-0.0666305	0.0047	0.0077	0.0141577	5.20809e-06	0.5408	13772	genus.LachnospiraceaeFCS020group.id.11314	FT4	0.00160572	22.1463
rs2862811	T	C	0.0564927	-0.0035	0.0065	0.0121736	3.91911e-06	0.5922	13772	genus.LachnospiraceaeFCS020group.id.11314	FT4	0.00156125	21.532
rs35035870	T	C	-0.190615	-0.0015	0.0165	0.0414403	2.62028e-06	0.9253	5642	genus.LachnospiraceaeFCS020group.id.11314	FT4	0.00373604	21.1503
rs3999074	G	T	-0.0550587	-0.0038	0.0065	0.0121847	6.55048e-06	0.5607	13772	genus.LachnospiraceaeFCS020group.id.11314	FT4	0.00148041	20.4155
rs4452603	T	G	0.0604208	-0.0029	0.0084	0.0135965	8.9819e-06	0.7271	13487	genus.LachnospiraceaeFCS020group.id.11314	FT4	0.00146208	19.745
rs7249113	G	A	0.0679483	-0.0093	0.0083	0.0133496	3.72097e-07	0.2604	13534	genus.LachnospiraceaeFCS020group.id.11314	FT4	0.00191058	25.9034
rs72793667	A	G	-0.116881	-0.0149	0.015	0.0246589	1.63421e-06	0.3201	12396	genus.LachnospiraceaeFCS020group.id.11314	FT4	0.00180913	22.463
rs9308097	A	G	0.055381	-0.0061	0.007	0.0123659	7.4729e-06	0.3885	13542	genus.LachnospiraceaeFCS020group.id.11314	FT4	0.00147891	20.0541
rs9788306	C	T	-0.062804	-0.0122	0.0073	0.0130744	1.38618e-06	0.09417	13772	genus.LachnospiraceaeFCS020group.id.11314	FT4	0.00167265	23.071
rs13157098	A	G	-0.0768058	0.0301	0.0109	0.0155312	5.99315e-07	0.005684	15947	genus.Lachnospira.id.2004	FT4	0.00153121	24.4525
rs159484	G	A	0.0794668	0.0003	0.0106	0.0176999	6.67622e-06	0.9789	16487	genus.Lachnospira.id.2004	FT4	0.00122112	20.1548
rs2520509	A	G	0.0519063	0.0051	0.0069	0.011578	7.41854e-06	0.4541	16500	genus.Lachnospira.id.2004	FT4	0.00121664	20.0966
rs4686798	T	C	0.0531826	-0.0023	0.0067	0.0113747	2.73936e-06	0.7264	16497	genus.Lachnospira.id.2004	FT4	0.00132335	21.8576
rs4923324	G	A	-0.0617321	-0.0025	0.0077	0.0133387	2.43593e-06	0.7485	16490	genus.Lachnospira.id.2004	FT4	0.00129722	21.4163
rs56791201	T	C	0.051823	-0.0082	0.0068	0.0110697	2.92823e-06	0.2289	16486	genus.Lachnospira.id.2004	FT4	0.00132765	21.9141
rs1031599	G	T	-0.078627	-0.0058	0.012	0.0175644	6.31376e-06	0.6318	17398	genus.Lachnoclostridium.id.11308	FT4	0.00115047	20.0367
rs12566975	T	C	-0.0468097	0.0065	0.0066	0.0105787	9.57204e-06	0.324	17921	genus.Lachnoclostridium.id.11308	FT4	0.00109137	19.5776
rs1528479	G	A	-0.0497798	0.002	0.0074	0.0111919	9.63976e-06	0.7929	17477	genus.Lachnoclostridium.id.11308	FT4	0.00113068	19.781
rs1997204	T	C	-0.108075	0.0131	0.0143	0.0242022	5.97081e-06	0.3604	14138	genus.Lachnoclostridium.id.11308	FT4	0.00140844	19.9378
rs2385421	A	G	0.0746186	0.0149	0.0134	0.0180734	7.13717e-06	0.2639	17903	genus.Lachnoclostridium.id.11308	FT4	0.000951206	17.0438
rs3821998	C	A	-0.0864066	-0.001	0.0123	0.0192519	6.72052e-06	0.9332	17920	genus.Lachnoclostridium.id.11308	FT4	0.00112284	20.1417
rs4738679	G	A	-0.0520267	0.0107	0.0068	0.011404	4.41754e-06	0.1156	17921	genus.Lachnoclostridium.id.11308	FT4	0.00116003	20.8106
rs6112314	A	C	-0.0561715	-0.0016	0.0066	0.0108174	2.43212e-07	0.8133	17842	genus.Lachnoclostridium.id.11308	FT4	0.00150899	26.961
rs615997	T	C	0.0511752	0.0055	0.0066	0.0106491	2.02677e-06	0.3998	17911	genus.Lachnoclostridium.id.11308	FT4	0.00128771	23.0913
rs62285313	A	G	0.0864203	0.016	0.0125	0.0181565	1.58331e-06	0.2009	16991	genus.Lachnoclostridium.id.11308	FT4	0.00133158	22.6524
rs72829893	G	T	0.117472	-0.0166	0.0159	0.0268103	5.57766e-06	0.2973	12404	genus.Lachnoclostridium.id.11308	FT4	0.00154538	19.1954
rs78068103	A	G	0.0886199	-0.0109	0.0151	0.0194248	3.66519e-06	0.4698	17477	genus.Lachnoclostridium.id.11308	FT4	0.0011895	20.8113
rs789029	C	T	-0.0641288	-0.018	0.0085	0.0137974	3.75328e-06	0.03523	17922	genus.Lachnoclostridium.id.11308	FT4	0.00120393	21.6005
rs10262702	T	C	0.0918017	0.0146	0.0118	0.0194885	2.06073e-06	0.218	11766	genus.Intestinimonas.id.2062	FT4	0.00188234	22.1857
rs11258178	A	G	0.0660742	-0.0104	0.0071	0.0134139	6.98195e-07	0.1407	11766	genus.Intestinimonas.id.2062	FT4	0.00205793	24.2595
rs12226153	A	G	-0.151142	0.0071	0.0144	0.0306922	5.12171e-07	0.6188	9023	genus.Intestinimonas.id.2062	FT4	0.0026804	24.2449
rs17067892	C	T	0.107194	-0.0183	0.0129	0.0250013	6.37926e-06	0.1568	11544	genus.Intestinimonas.id.2062	FT4	0.00158988	18.3797
rs1859797	G	A	0.060368	-0.0044	0.0065	0.0131793	4.12235e-06	0.5034	11766	genus.Intestinimonas.id.2062	FT4	0.00178004	20.9777
rs2276760	A	G	-0.0685234	0.0013	0.0082	0.0152546	7.84062e-06	0.8755	12081	genus.Intestinimonas.id.2062	FT4	0.00166744	20.1746
rs2731794	C	T	0.120632	-0.0277	0.0148	0.0257529	1.91744e-06	0.06227	11079	genus.Intestinimonas.id.2062	FT4	0.00197657	21.9379
rs2930225	G	T	0.0729524	-0.0049	0.0078	0.0152948	1.34622e-06	0.5256	12003	genus.Intestinimonas.id.2062	FT4	0.00189181	22.7466
rs4113676	A	C	-0.218507	-0.0217	0.0201	0.0490152	7.41635e-06	0.2812	3170	genus.Intestinimonas.id.2062	FT4	0.00623011	19.8607
rs4784055	T	C	-0.175324	0.0129	0.0174	0.038599	8.71812e-07	0.4572	3193	genus.Intestinimonas.id.2062	FT4	0.00641998	20.6185
rs62240188	G	A	0.130074	0.0198	0.0161	0.0267179	2.20308e-06	0.2197	10252	genus.Intestinimonas.id.2062	FT4	0.00230655	23.6968
rs62427239	C	A	0.162658	0.0071	0.0196	0.0367647	9.40505e-06	0.7182	6385	genus.Intestinimonas.id.2062	FT4	0.00305632	19.5683
rs6934519	C	T	0.0692373	-0.0045	0.0074	0.0151154	8.56956e-06	0.549	12089	genus.Intestinimonas.id.2062	FT4	0.00173261	20.9784
rs716604	A	G	0.0818068	0.0022	0.0089	0.0165992	8.5663e-07	0.8028	12090	genus.Intestinimonas.id.2062	FT4	0.00200496	24.2846
rs7170984	T	C	-0.0658116	0.0056	0.0079	0.0140767	2.98356e-06	0.4764	12090	genus.Intestinimonas.id.2062	FT4	0.00180464	21.8539
rs72982915	C	T	0.183158	-0.0079	0.0164	0.0402743	4.91157e-06	0.6296	5591	genus.Intestinimonas.id.2062	FT4	0.00368555	20.6748
rs9823439	T	C	-0.0581947	0.004	0.007	0.0131455	9.85876e-06	0.5663	11766	genus.Intestinimonas.id.2062	FT4	0.00166289	19.5948
rs10805326	G	A	0.0775151	0.0025	0.0072	0.0139665	3.54544e-08	0.7341	12303	genus.Intestinibacter.id.11345	FT4	0.00249748	30.7984
rs11109097	C	T	0.0624272	0.0078	0.0072	0.0138539	5.49484e-06	0.278	11886	genus.Intestinibacter.id.11345	FT4	0.0017054	20.3016
rs118030283	G	A	-0.151829	-0.0026	0.0147	0.0324471	2.67439e-06	0.858	8830	genus.Intestinibacter.id.11345	FT4	0.00247355	21.8907
rs16938435	T	C	-0.112189	-0.018	0.0127	0.0235439	1.80097e-06	0.1565	12303	genus.Intestinibacter.id.11345	FT4	0.00184217	22.7023
rs2098844	C	T	-0.0575295	-0.0042	0.0067	0.0128416	6.78879e-06	0.5262	12291	genus.Intestinibacter.id.11345	FT4	0.00163023	20.0667
rs2702387	A	G	0.0608559	0.0071	0.007	0.0132145	4.25994e-06	0.3112	12291	genus.Intestinibacter.id.11345	FT4	0.00172252	21.2046
rs4327025	G	A	-0.0810346	0.0133	0.0079	0.0154397	1.64326e-07	0.09153	12303	genus.Intestinibacter.id.11345	FT4	0.002234	27.5419
rs447950	A	G	0.0628342	0.0161	0.0071	0.0136652	5.63911e-06	0.02329	12303	genus.Intestinibacter.id.11345	FT4	0.00171554	21.1391
rs478972	T	C	-0.142681	0.0063	0.0142	0.0297116	1.81991e-06	0.6589	10333	genus.Intestinibacter.id.11345	FT4	0.00222682	23.0566
rs6062862	A	G	0.0924508	-0.0061	0.011	0.0204658	6.67984e-06	0.5783	12189	genus.Intestinibacter.id.11345	FT4	0.00167136	20.4029
rs62430350	T	C	0.151096	0.0043	0.0152	0.0351476	6.84229e-06	0.7756	7650	genus.Intestinibacter.id.11345	FT4	0.00240992	18.4756
rs68093214	C	T	0.0662258	0.0007	0.0075	0.0149877	9.25769e-06	0.9257	11886	genus.Intestinibacter.id.11345	FT4	0.00163996	19.5213
rs6875660	C	T	0.0890455	-0.0127	0.01	0.0193905	3.05781e-06	0.2055	12293	genus.Intestinibacter.id.11345	FT4	0.00171255	21.0851
rs893394	G	A	0.0583322	0.0092	0.0073	0.0130729	7.85038e-06	0.2044	11886	genus.Intestinibacter.id.11345	FT4	0.00167227	19.9066
rs9348442	C	T	0.099082	-0.0126	0.0125	0.0221625	6.25936e-06	0.313	12303	genus.Intestinibacter.id.11345	FT4	0.00162194	19.9839
rs10044993	C	A	0.139547	0.0091	0.0096	0.0316748	8.06668e-06	0.3415	4209	genus.Hungatella.id.11306	FT4	0.00459025	19.4002
rs13128780	T	C	-0.149725	0.005	0.01	0.0312777	1.74998e-06	0.6145	3999	genus.Hungatella.id.11306	FT4	0.00569753	22.9035
rs13249325	T	G	-0.100023	-0.0052	0.0067	0.0225883	9.69162e-06	0.4394	4209	genus.Hungatella.id.11306	FT4	0.00463693	19.5984
rs17092615	G	A	0.152235	-0.0126	0.0097	0.0337867	7.37677e-06	0.1932	4009	genus.Hungatella.id.11306	FT4	0.00503854	20.2917
rs72759041	G	T	-0.126025	0.0125	0.0107	0.0282242	3.86095e-06	0.2435	3910	genus.Hungatella.id.11306	FT4	0.00507322	19.9272
rs10048062	C	T	-0.147352	-0.0012	0.01	0.0336531	8.58873e-06	0.9006	3800	genus.Howardella.id.2000	FT4	0.00501988	19.1617
rs12452946	A	G	-0.105833	-0.0027	0.0066	0.0228941	3.80393e-06	0.684	3800	genus.Howardella.id.2000	FT4	0.00559213	21.3584
rs1484873	A	G	-0.227831	0.0144	0.0141	0.046335	2.55918e-06	0.3086	3608	genus.Howardella.id.2000	FT4	0.00665642	24.1639
rs17167098	G	A	-0.169366	-0.0019	0.01	0.0352068	1.12323e-06	0.8477	3586	genus.Howardella.id.2000	FT4	0.00641201	23.1289
rs2154047	C	A	-0.192557	0.0051	0.0128	0.0420093	9.97042e-06	0.6883	3623	genus.Howardella.id.2000	FT4	0.00576564	20.9985
rs36081916	T	C	-0.18123	0.0069	0.012	0.0402987	4.7004e-06	0.5646	3216	genus.Howardella.id.2000	FT4	0.00624939	20.2119
rs3791893	A	G	0.147035	0.0042	0.0104	0.034023	9.49716e-06	0.6876	3795	genus.Howardella.id.2000	FT4	0.00489727	18.6668
rs609430	T	G	-0.112045	0.0011	0.007	0.0239328	3.34484e-06	0.8754	3798	genus.Howardella.id.2000	FT4	0.00573782	21.9065
rs672217	G	A	0.164146	0.0043	0.0097	0.0349993	3.52468e-06	0.6554	3611	genus.Howardella.id.2000	FT4	0.00605447	21.9837
rs901099	T	G	-0.12718	0.009	0.0077	0.0250924	6.52858e-07	0.2468	3647	genus.Howardella.id.2000	FT4	0.0069947	25.6753
rs10885477	T	C	-0.135137	0.0253	0.0137	0.0301894	8.59833e-06	0.06528	8690	genus.Holdemania.id.2157	FT4	0.00230047	20.0325
rs11080063	G	A	-0.0665238	0.0051	0.0065	0.0149837	6.66887e-06	0.4364	9103	genus.Holdemania.id.2157	FT4	0.00216068	19.7069
rs111745969	A	G	0.120677	-0.0099	0.0124	0.0265781	3.70776e-06	0.4255	8233	genus.Holdemania.id.2157	FT4	0.00249779	20.6108
rs113593397	A	G	-0.128935	-0.0058	0.0122	0.0282526	9.35728e-06	0.6304	8296	genus.Holdemania.id.2157	FT4	0.00250417	20.8218
rs116500994	G	T	-0.13755	-0.0155	0.014	0.0293386	2.34479e-06	0.2712	8432	genus.Holdemania.id.2157	FT4	0.00260006	21.9757
rs12701617	A	G	-0.0660617	-0.0104	0.0065	0.0149427	9.51844e-06	0.1116	9106	genus.Holdemania.id.2157	FT4	0.00214183	19.541
rs1867876	T	C	0.0842919	0.0137	0.0072	0.0162192	2.7388e-07	0.05618	9109	genus.Holdemania.id.2157	FT4	0.00295636	27.0034
rs4146507	C	T	0.079488	0.0109	0.0079	0.0177002	7.22973e-06	0.1667	9108	genus.Holdemania.id.2157	FT4	0.00220934	20.1628
rs73139538	G	A	-0.148594	0.0061	0.0176	0.0327469	7.77178e-06	0.7279	8095	genus.Holdemania.id.2157	FT4	0.00253711	20.5851
rs77293403	A	G	0.164556	0.0101	0.0146	0.0341775	1.77466e-06	0.4875	7585	genus.Holdemania.id.2157	FT4	0.00304698	23.1758
rs80149660	C	T	-0.232987	-0.0155	0.0142	0.0519183	6.04217e-06	0.2747	3283	genus.Holdemania.id.2157	FT4	0.00609673	20.1261
rs9500080	C	T	0.0926764	-0.0066	0.0078	0.0178886	4.08515e-07	0.397	9106	genus.Holdemania.id.2157	FT4	0.00293886	26.8343
rs9529719	T	C	0.074038	0	0.0071	0.0160494	5.96669e-06	0.9964	9107	genus.Holdemania.id.2157	FT4	0.00233131	21.2762
rs967319	T	C	0.0788638	-0.0059	0.0077	0.0176744	8.38155e-06	0.445	9108	genus.Holdemania.id.2157	FT4	0.0021812	19.9054
rs12513188	G	A	0.0903906	0.0162	0.0084	0.0195276	4.6548e-06	0.053	7700	genus.Holdemanella.id.11393	FT4	0.00277492	21.4208
rs17586763	T	C	-0.227285	-0.0132	0.0161	0.0510135	7.71949e-06	0.4132	3817	genus.Holdemanella.id.11393	FT4	0.00517363	19.84
rs1926302	G	A	-0.107972	0.0056	0.0101	0.0231421	7.50141e-06	0.5842	7702	genus.Holdemanella.id.11393	FT4	0.0028183	21.7622
rs34187114	C	A	-0.104505	-0.0146	0.0091	0.022601	5.13495e-06	0.1071	7704	genus.Holdemanella.id.11393	FT4	0.0027676	21.3752
rs35228298	G	A	0.0934832	0.0053	0.0083	0.0202886	7.29849e-06	0.5219	7456	genus.Holdemanella.id.11393	FT4	0.00283938	21.225
rs4541991	T	C	-0.0927334	-0.003	0.0079	0.0194435	2.10094e-06	0.7064	7657	genus.Holdemanella.id.11393	FT4	0.00296195	22.7411
rs607782	T	C	-0.0854214	0.0097	0.0077	0.0172515	7.19447e-07	0.2083	7456	genus.Holdemanella.id.11393	FT4	0.00327754	24.5111
rs62113381	T	C	-0.105447	0.0011	0.01	0.0232029	5.53879e-06	0.9162	7310	genus.Holdemanella.id.11393	FT4	0.00281736	20.6474
rs73011279	T	C	-0.0961669	0.0199	0.0092	0.0199336	1.36046e-06	0.03007	7456	genus.Holdemanella.id.11393	FT4	0.00311185	23.2681
rs10781340	G	A	0.0948915	-0.007	0.0092	0.0203221	4.32266e-06	0.4478	9037	genus.Haemophilus.id.3698	FT4	0.00240684	21.7983
rs111582866	G	A	-0.124265	0.0063	0.0117	0.026016	1.27347e-06	0.5881	8370	genus.Haemophilus.id.3698	FT4	0.00271839	22.8095
rs35509	G	A	0.128249	-0.0175	0.0129	0.0268779	2.00952e-06	0.1752	8430	genus.Haemophilus.id.3698	FT4	0.0026935	22.7622
rs4822728	T	C	0.0705861	0.0025	0.007	0.0151388	3.47849e-06	0.7158	9119	genus.Haemophilus.id.3698	FT4	0.00237835	21.7351
rs76022354	C	T	0.244638	0.0104	0.0168	0.0505504	1.83031e-06	0.5365	3618	genus.Haemophilus.id.3698	FT4	0.0064317	23.4076
rs78909003	T	C	-0.246256	-0.0013	0.0165	0.0503924	1.66745e-06	0.9384	3559	genus.Haemophilus.id.3698	FT4	0.00666516	23.867
rs9328464	T	C	0.0723095	0.0071	0.0067	0.0148799	1.42269e-06	0.284	9119	genus.Haemophilus.id.3698	FT4	0.00258296	23.6098
rs9382510	C	T	-0.093521	-0.0066	0.0078	0.0172649	7.12051e-08	0.3978	9117	genus.Haemophilus.id.3698	FT4	0.00320808	29.3358
rs9895850	T	C	-0.192957	0.0066	0.0155	0.0416755	2.1406e-06	0.67	4592	genus.Haemophilus.id.3698	FT4	0.00464659	21.4274
rs13412653	A	C	0.107597	0.0084	0.0072	0.0239228	8.61141e-06	0.2408	3723	genus.Gordonibacter.id.821	FT4	0.00540424	20.2184
rs16955299	G	A	-0.196423	-0.0055	0.0134	0.0433538	6.37019e-06	0.6787	3572	genus.Gordonibacter.id.821	FT4	0.00571387	20.5157
rs322296	G	A	0.17869	-0.0138	0.0106	0.037722	4.02422e-06	0.1903	3595	genus.Gordonibacter.id.821	FT4	0.0062031	22.4268
rs35042269	C	A	-0.180293	-0.0148	0.0091	0.0403296	8.10852e-06	0.1033	3595	genus.Gordonibacter.id.821	FT4	0.00552842	19.974
rs3765837	T	G	-0.190729	0.0041	0.0116	0.0433608	7.16906e-06	0.7208	3556	genus.Gordonibacter.id.821	FT4	0.0054115	19.3371
rs4596722	A	G	0.102908	0.0055	0.0066	0.0231571	9.0568e-06	0.3996	3723	genus.Gordonibacter.id.821	FT4	0.00527645	19.7378
rs61934597	C	T	-0.172495	-0.0063	0.011	0.0388567	8.36672e-06	0.5671	3684	genus.Gordonibacter.id.821	FT4	0.00532087	19.6962
rs71545975	A	G	-0.153972	-0.0032	0.0094	0.0338918	7.03944e-06	0.7362	3556	genus.Gordonibacter.id.821	FT4	0.00577059	20.6277
rs72714787	C	A	0.181405	0.0068	0.0118	0.0377102	1.42889e-06	0.5636	3723	genus.Gordonibacter.id.821	FT4	0.00617727	23.1285
rs72939513	A	G	-0.21399	0.0018	0.0144	0.0490592	7.98199e-06	0.8992	3435	genus.Gordonibacter.id.821	FT4	0.00550832	19.0148
rs7294633	C	T	0.12867	0.0014	0.0072	0.0249946	3.43763e-07	0.8407	3723	genus.Gordonibacter.id.821	FT4	0.00706786	26.4867
rs768830	G	A	0.149852	0.0079	0.01	0.0333315	7.75583e-06	0.432	3723	genus.Gordonibacter.id.821	FT4	0.00539976	20.2016
rs10439674	A	G	-0.0572129	-0.0053	0.0078	0.0130007	7.68485e-06	0.4994	17381	genus.Fusicatenibacter.id.11305	FT4	0.00111301	19.3645
rs167879	C	T	-0.0659543	-0.0048	0.0087	0.0148763	5.86893e-06	0.5767	16542	genus.Fusicatenibacter.id.11305	FT4	0.00118685	19.6538
rs1864685	A	C	-0.0494799	0.0107	0.0067	0.0108105	4.96161e-06	0.1108	17374	genus.Fusicatenibacter.id.11305	FT4	0.00120433	20.9468
rs2025938	G	A	-0.0967298	0.02	0.0124	0.0205426	2.98832e-06	0.1059	15626	genus.Fusicatenibacter.id.11305	FT4	0.00141693	22.1695
rs206581	A	G	-0.0568339	0.0076	0.0083	0.0127894	8.95756e-06	0.3587	17384	genus.Fusicatenibacter.id.11305	FT4	0.00113467	19.7453
rs2132128	G	A	-0.0771914	-0.0035	0.0095	0.0160344	1.07686e-06	0.714	17370	genus.Fusicatenibacter.id.11305	FT4	0.00133245	23.1729
rs3303	T	C	-0.0953657	-0.0343	0.0146	0.020407	3.93891e-06	0.01873	16877	genus.Fusicatenibacter.id.11305	FT4	0.00129232	21.8361
rs4378146	A	C	-0.0616691	-0.0038	0.0075	0.0125259	7.20451e-07	0.615	17384	genus.Fusicatenibacter.id.11305	FT4	0.0013924	24.2364
rs60254196	A	G	-0.0492427	-0.0121	0.0074	0.0109365	5.46739e-06	0.1025	16978	genus.Fusicatenibacter.id.11305	FT4	0.00119268	20.2711
rs62187631	T	C	-0.0710571	0.0124	0.0107	0.015924	4.54526e-06	0.2492	16522	genus.Fusicatenibacter.id.11305	FT4	0.00120372	19.9094
rs62353480	A	G	-0.0701397	-0.001	0.0095	0.0145589	1.56768e-06	0.9141	16119	genus.Fusicatenibacter.id.11305	FT4	0.00143783	23.2069
rs6515626	G	A	0.141575	-0.0285	0.0155	0.0313559	7.28654e-06	0.0652	7796	genus.Fusicatenibacter.id.11305	FT4	0.00260813	20.3809
rs704418	T	C	0.0739124	0.0067	0.01	0.0151073	7.77428e-07	0.5023	16626	genus.Fusicatenibacter.id.11305	FT4	0.00143764	23.9337
rs73103914	A	G	-0.0597324	-0.0063	0.0081	0.0134458	8.29563e-06	0.4357	17384	genus.Fusicatenibacter.id.11305	FT4	0.00113398	19.7333
rs792108	T	C	-0.0508345	-0.0038	0.0072	0.0113843	8.49535e-06	0.5928	16978	genus.Fusicatenibacter.id.11305	FT4	0.00117302	19.9366
rs8028026	A	G	-0.0792146	-0.0017	0.0109	0.0180505	8.0633e-06	0.8765	16522	genus.Fusicatenibacter.id.11305	FT4	0.0011643	19.2566
rs8063430	T	C	-0.104026	-0.0119	0.0134	0.022217	4.9289e-06	0.3728	15552	genus.Fusicatenibacter.id.11305	FT4	0.00140773	21.9211
rs9905659	G	A	-0.061617	-0.0139	0.0086	0.0136576	7.30993e-06	0.1051	17384	genus.Fusicatenibacter.id.11305	FT4	0.00116949	20.3518
rs114873521	C	T	-0.130067	-0.0152	0.0195	0.0294087	7.12522e-06	0.4343	9156	genus.Flavonifractor.id.2059	FT4	0.00213181	19.5563
rs11811696	T	C	-0.116063	0.0029	0.0113	0.0241012	2.07346e-06	0.7972	10221	genus.Flavonifractor.id.2059	FT4	0.00226377	23.1859
rs12030302	A	G	-0.0692276	0.0116	0.0065	0.0137467	5.6084e-07	0.07232	10805	genus.Flavonifractor.id.2059	FT4	0.00234163	25.356
rs34066017	A	G	0.0764294	0.0009	0.0073	0.0159789	1.52086e-06	0.9008	10705	genus.Flavonifractor.id.2059	FT4	0.00213261	22.8741
rs806808	T	C	0.0667272	-0.0092	0.0065	0.0136557	1.17972e-06	0.1598	10801	genus.Flavonifractor.id.2059	FT4	0.00220573	23.8723
rs112362903	A	G	-0.149047	0.0055	0.0201	0.0333271	7.8777e-06	0.7827	8579	genus.FamilyXIIIUCG001.id.11294	FT4	0.00232596	19.9963
rs12049454	T	C	-0.0647298	-0.0143	0.0072	0.0134065	1.17378e-06	0.04674	12748	genus.FamilyXIIIUCG001.id.11294	FT4	0.00182532	23.3081
rs1426266	T	C	-0.0665521	-0.0036	0.0074	0.0137151	1.24935e-06	0.6275	12751	genus.FamilyXIIIUCG001.id.11294	FT4	0.00184324	23.5429
rs3842897	G	A	-0.112639	-0.0156	0.0131	0.0242751	5.19705e-06	0.2342	12407	genus.FamilyXIIIUCG001.id.11294	FT4	0.00173236	21.5272
rs62414802	C	T	-0.0611904	-0.0081	0.0069	0.013457	4.29181e-06	0.2401	12750	genus.FamilyXIIIUCG001.id.11294	FT4	0.00161904	20.673
rs7119679	G	A	-0.0809085	0.0082	0.0103	0.0174782	3.52494e-06	0.4249	12445	genus.FamilyXIIIUCG001.id.11294	FT4	0.00171891	21.4252
rs76463770	A	G	0.19313	-0.0214	0.0151	0.0419866	3.77476e-06	0.1559	5651	genus.FamilyXIIIUCG001.id.11294	FT4	0.00373017	21.1506
rs8076666	A	G	0.088655	-0.0061	0.01	0.0198094	8.0183e-06	0.5449	12265	genus.FamilyXIIIUCG001.id.11294	FT4	0.00163037	20.0259
rs11126423	C	T	0.0904399	0.005	0.0141	0.0196301	5.91249e-06	0.7232	13735	genus.FamilyXIIIAD3011group.id.11293	FT4	0.00154303	21.2232
rs11736617	G	A	-0.0759493	-0.0053	0.0099	0.0172101	9.02048e-06	0.5928	13778	genus.FamilyXIIIAD3011group.id.11293	FT4	0.00141151	19.4724
rs12812672	T	C	-0.096065	0.0108	0.0113	0.020828	2.55807e-06	0.3368	13565	genus.FamilyXIIIAD3011group.id.11293	FT4	0.00156579	21.2701
rs149302	T	C	-0.0645635	-0.0018	0.0079	0.0143225	7.4818e-06	0.8207	14192	genus.FamilyXIIIAD3011group.id.11293	FT4	0.00142979	20.3178
rs16840310	A	G	-0.0608052	-0.0042	0.0068	0.0122149	6.75113e-07	0.5382	14201	genus.FamilyXIIIAD3011group.id.11293	FT4	0.00174191	24.7765
rs16940167	C	T	0.0732552	-0.0228	0.0091	0.0159898	3.90837e-06	0.01213	14201	genus.FamilyXIIIAD3011group.id.11293	FT4	0.00147581	20.986
rs17156849	G	A	-0.112891	0.0204	0.0133	0.0245292	4.19171e-06	0.1245	13352	genus.FamilyXIIIAD3011group.id.11293	FT4	0.00158385	21.178
rs62029761	A	G	0.128753	-0.004	0.0186	0.0276002	3.89083e-06	0.8285	9655	genus.FamilyXIIIAD3011group.id.11293	FT4	0.00224885	21.757
rs62200412	C	T	-0.0800851	0.0119	0.0105	0.0163834	5.80219e-07	0.2561	13661	genus.FamilyXIIIAD3011group.id.11293	FT4	0.00174603	23.8908
rs72730932	C	A	-0.0899559	0.0074	0.0099	0.0177107	6.88766e-07	0.4554	13102	genus.FamilyXIIIAD3011group.id.11293	FT4	0.00196516	25.7943
rs739451	C	T	0.0649589	0.0022	0.0082	0.0147534	7.8781e-06	0.7915	14197	genus.FamilyXIIIAD3011group.id.11293	FT4	0.00136365	19.3834
rs9837139	A	G	0.10752	-0.0101	0.0143	0.0240482	8.70808e-06	0.4792	13527	genus.FamilyXIIIAD3011group.id.11293	FT4	0.00147562	19.9872
rs10927394	G	T	-0.232262	0.0205	0.0194	0.0512364	7.01885e-06	0.2893	3495	genus.Faecalibacterium.id.2057	FT4	0.00584529	20.5376
rs114946999	C	T	-0.0861565	-0.0069	0.013	0.01896	5.69574e-06	0.5961	15673	genus.Faecalibacterium.id.2057	FT4	0.00131575	20.6463
rs11776390	T	C	-0.078354	0.002	0.0109	0.017183	6.39675e-06	0.8514	16718	genus.Faecalibacterium.id.2057	FT4	0.00124222	20.7907
rs1271565	C	T	-0.0576251	0.0012	0.0078	0.0119649	1.30169e-06	0.8725	17638	genus.Faecalibacterium.id.2057	FT4	0.00131336	23.1929
rs12753492	A	C	0.0641305	0.0123	0.0105	0.0149933	8.80273e-06	0.2392	17525	genus.Faecalibacterium.id.2057	FT4	0.00104285	18.2929
rs2835874	T	C	-0.0866356	-0.0129	0.0123	0.0196496	7.54405e-06	0.2958	17567	genus.Faecalibacterium.id.2057	FT4	0.00110537	19.4374
rs6910935	A	G	0.134864	0.0185	0.0152	0.0277032	1.37848e-06	0.2251	12640	genus.Faecalibacterium.id.2057	FT4	0.00187142	23.6954
rs75499067	C	T	0.227585	-0.0071	0.0162	0.0465522	1.76448e-06	0.6601	4526	genus.Faecalibacterium.id.2057	FT4	0.00525295	23.8899
rs79656633	T	C	0.145631	-0.0052	0.015	0.0323019	8.13557e-06	0.7286	9080	genus.Faecalibacterium.id.2057	FT4	0.00223354	20.3215
rs9536330	T	C	-0.048317	0.0013	0.0066	0.010797	5.33258e-06	0.85	18082	genus.Faecalibacterium.id.2057	FT4	0.00110628	20.0237
rs112767262	T	C	0.0732963	0.0025	0.0088	0.0163589	8.20636e-06	0.776	11771	genus.Escherichia.Shigella.id	FT4	0.00170257	20.0717
rs113127095	A	G	0.151009	-0.022	0.0166	0.0323434	3.33349e-06	0.1852	8433	genus.Escherichia.Shigella.id	FT4	0.00257829	21.7938
rs113513883	A	G	0.172283	0.048	0.0253	0.038041	5.27716e-06	0.05721	6280	genus.Escherichia.Shigella.id	FT4	0.00325541	20.5042
rs1154904	A	G	-0.0613376	-0.0077	0.0067	0.0130644	3.03751e-06	0.246	12002	genus.Escherichia.Shigella.id	FT4	0.00183325	22.0395
rs118526	C	A	-0.0594401	-0.0102	0.0068	0.013598	7.99566e-06	0.1331	11853	genus.Escherichia.Shigella.id	FT4	0.00160946	19.1045
rs2798105	A	G	-0.100851	-0.0073	0.0113	0.0222045	8.24501e-06	0.5187	11296	genus.Escherichia.Shigella.id	FT4	0.00182289	20.6253
rs4731451	G	A	-0.0609885	0.0067	0.0069	0.0135157	7.4731e-06	0.3325	12001	genus.Escherichia.Shigella.id	FT4	0.00169381	20.3585
rs57024273	T	C	0.0626172	0.0036	0.0078	0.0139919	9.70464e-06	0.6443	11853	genus.Escherichia.Shigella.id	FT4	0.00168684	20.0246
rs592299	T	C	-0.0592004	0.007	0.0067	0.0129486	4.76927e-06	0.2925	11995	genus.Escherichia.Shigella.id	FT4	0.00173958	20.8992
rs73208162	A	G	-0.119296	0.0165	0.0156	0.024839	2.19391e-06	0.2901	11073	genus.Escherichia.Shigella.id	FT4	0.0020788	23.0623
rs10164067	T	G	-0.10326	0.0133	0.0121	0.0212405	1.13086e-06	0.2719	14427	genus.ErysipelotrichaceaeUCG003.id.11384	FT4	0.00163549	23.6306
rs11666127	A	G	-0.0719187	-0.0101	0.0099	0.0161371	7.90414e-06	0.3056	13813	genus.ErysipelotrichaceaeUCG003.id.11384	FT4	0.0014359	19.8597
rs11994308	C	T	0.115417	-0.0098	0.0131	0.0242503	1.32563e-06	0.4557	13558	genus.ErysipelotrichaceaeUCG003.id.11384	FT4	0.00166797	22.6488
rs12251396	A	G	-0.0705399	0.0018	0.0086	0.0158766	9.51839e-06	0.8345	14211	genus.ErysipelotrichaceaeUCG003.id.11384	FT4	0.00138716	19.7376
rs17798136	G	A	0.158818	0.0066	0.0156	0.0347674	3.23598e-06	0.6723	7421	genus.ErysipelotrichaceaeUCG003.id.11384	FT4	0.00280395	20.861
rs4758231	G	T	-0.0551754	0.0024	0.007	0.0122047	6.54912e-06	0.7295	14890	genus.ErysipelotrichaceaeUCG003.id.11384	FT4	0.00137072	20.4353
rs59068084	T	G	0.0564772	0.0016	0.007	0.0120224	3.11742e-06	0.8225	14544	genus.ErysipelotrichaceaeUCG003.id.11384	FT4	0.00151504	22.0651
rs59104037	A	G	-0.0951263	0.0275	0.0116	0.0204742	4.48256e-06	0.01803	14848	genus.ErysipelotrichaceaeUCG003.id.11384	FT4	0.00145174	21.5838
rs62403464	T	C	-0.0731743	0.0143	0.0086	0.0156516	3.43738e-06	0.09591	14899	genus.ErysipelotrichaceaeUCG003.id.11384	FT4	0.0014649	21.8546
rs6875357	C	T	0.165673	-0.0031	0.0165	0.0353831	6.69637e-06	0.8517	7034	genus.ErysipelotrichaceaeUCG003.id.11384	FT4	0.00310713	21.9175
rs73074432	C	T	0.072154	0.0015	0.0088	0.0164378	9.9902e-06	0.8628	14217	genus.ErysipelotrichaceaeUCG003.id.11384	FT4	0.00135344	19.2652
rs74988980	G	A	-0.133141	-0.0148	0.0157	0.0348574	8.64276e-06	0.346	5944	genus.ErysipelotrichaceaeUCG003.id.11384	FT4	0.00244845	14.5844
rs75949021	T	C	-0.169667	0.0032	0.0165	0.0374238	3.57507e-06	0.8471	6721	genus.ErysipelotrichaceaeUCG003.id.11384	FT4	0.00304887	20.548
rs76502207	T	C	0.144844	-0.0278	0.0174	0.0289929	6.41121e-07	0.1112	10740	genus.ErysipelotrichaceaeUCG003.id.11384	FT4	0.00231848	24.9537
rs8053479	A	G	-0.0838212	-0.006	0.0111	0.0186509	5.83413e-06	0.5872	13813	genus.ErysipelotrichaceaeUCG003.id.11384	FT4	0.00146011	20.195
rs1434153	G	A	-0.0684526	0.0055	0.0075	0.0152443	6.85295e-06	0.4613	9662	genus.Erysipelatoclostridium.id.11381	FT4	0.00208253	20.1592
rs16936671	C	T	-0.0968026	-0.0003	0.0099	0.0217883	6.04309e-06	0.9784	9488	genus.Erysipelatoclostridium.id.11381	FT4	0.00207611	19.735
rs17804233	T	C	-0.0662914	0.0088	0.0066	0.0144203	4.58605e-06	0.182	9783	genus.Erysipelatoclostridium.id.11381	FT4	0.00215554	21.1289
rs2901723	C	A	0.0641339	0	0.0066	0.0144295	8.79469e-06	0.996	9662	genus.Erysipelatoclostridium.id.11381	FT4	0.00204043	19.7508
rs340991	A	G	-0.0740482	-0.0026	0.0073	0.0158891	3.74942e-06	0.7185	9781	genus.Erysipelatoclostridium.id.11381	FT4	0.00221555	21.714
rs3804326	A	G	0.14147	0.0191	0.0147	0.0336352	9.85273e-06	0.194	7028	genus.Erysipelatoclostridium.id.11381	FT4	0.00251083	17.6855
rs45480394	T	G	-0.0687134	-0.0027	0.0075	0.0151835	7.66155e-06	0.7197	9604	genus.Erysipelatoclostridium.id.11381	FT4	0.00212794	20.4761
rs4697572	A	G	-0.0810636	0.0004	0.0078	0.0163308	7.5935e-07	0.959	9779	genus.Erysipelatoclostridium.id.11381	FT4	0.00251333	24.6347
rs58236560	G	T	-0.111157	0.0092	0.0117	0.0234426	2.1612e-06	0.4301	9368	genus.Erysipelatoclostridium.id.11381	FT4	0.00239428	22.4786
rs61806970	C	T	0.142548	0.0093	0.0151	0.0320688	9.0941e-06	0.5378	8644	genus.Erysipelatoclostridium.id.11381	FT4	0.00228061	19.754
rs622418	A	G	-0.0668051	0.0182	0.0069	0.0143224	3.68156e-06	0.008241	9783	genus.Erysipelatoclostridium.id.11381	FT4	0.00221895	21.7518
rs6474512	A	C	0.067015	-0.0095	0.0066	0.0143201	3.01546e-06	0.1527	9783	genus.Erysipelatoclostridium.id.11381	FT4	0.0022336	21.8958
rs710230	T	C	0.143381	0.0117	0.0126	0.0281514	6.3312e-07	0.353	9016	genus.Erysipelatoclostridium.id.11381	FT4	0.00286895	25.9352
rs7221249	A	G	0.0839861	0.0033	0.0069	0.0142741	4.30951e-09	0.6323	9781	genus.Erysipelatoclostridium.id.11381	FT4	0.00352693	34.6119
rs9590927	G	A	-0.0646003	0.0075	0.0065	0.0143479	6.39042e-06	0.252	9782	genus.Erysipelatoclostridium.id.11381	FT4	0.00206806	20.2675
rs10098492	T	C	0.132323	-0.0072	0.0115	0.0293688	6.40572e-06	0.532	7361	genus.Enterorhabdus.id.820	FT4	0.00275021	20.2946
rs114731706	T	G	0.182308	0.0012	0.0152	0.0382298	2.17342e-06	0.938	5956	genus.Enterorhabdus.id.820	FT4	0.00380363	22.7333
rs2051957	C	T	0.0843291	0.0032	0.0075	0.0189864	8.89859e-06	0.6672	7524	genus.Enterorhabdus.id.820	FT4	0.00261507	19.7221
rs3017103	A	G	0.0980897	0.0175	0.0084	0.0208995	2.94044e-06	0.03712	7524	genus.Enterorhabdus.id.820	FT4	0.00291916	22.0222
rs73331712	T	C	0.26199	0.0056	0.0155	0.055123	4.84923e-06	0.7174	3109	genus.Enterorhabdus.id.820	FT4	0.00721335	22.5747
rs77655283	G	A	0.132988	0.0166	0.0125	0.0298306	5.88042e-06	0.1854	7494	genus.Enterorhabdus.id.820	FT4	0.00264506	19.8694
rs11027642	C	T	0.129006	0.0024	0.0096	0.0284844	4.91871e-06	0.8053	5583	genus.Eisenbergiella.id.11304	FT4	0.00366052	20.5044
rs11079158	T	C	0.100627	-0.0083	0.0077	0.022546	7.34849e-06	0.2788	5582	genus.Eisenbergiella.id.11304	FT4	0.0035559	19.9128
rs11938607	T	C	0.0978125	0.0069	0.0079	0.0216636	8.2182e-06	0.3795	5583	genus.Eisenbergiella.id.11304	FT4	0.00363813	20.3786
rs12257723	A	C	-0.0952742	-0.0029	0.0072	0.0211569	8.85121e-06	0.6825	5582	genus.Eisenbergiella.id.11304	FT4	0.00361978	20.2717
rs12710729	C	A	0.0893384	-0.0039	0.0072	0.0199069	9.8441e-06	0.5919	5583	genus.Eisenbergiella.id.11304	FT4	0.00359448	20.1332
rs13258851	A	G	0.137001	0.0055	0.0108	0.0302124	7.74648e-06	0.6122	5583	genus.Eisenbergiella.id.11304	FT4	0.00366957	20.5553
rs1508033	A	C	0.091546	0.0021	0.0068	0.0195787	3.22889e-06	0.7537	5580	genus.Eisenbergiella.id.11304	FT4	0.00390284	21.8553
rs1553971	T	G	0.120965	0.0061	0.0092	0.0263054	5.26837e-06	0.5096	5583	genus.Eisenbergiella.id.11304	FT4	0.00377325	21.1383
rs2683098	C	T	0.107319	0.0053	0.0079	0.022515	2.2375e-06	0.5069	5582	genus.Eisenbergiella.id.11304	FT4	0.00405372	22.7118
rs3812426	G	A	0.106447	0.0014	0.0077	0.0224159	2.71687e-06	0.8596	5583	genus.Eisenbergiella.id.11304	FT4	0.0040229	22.5425
rs4462860	G	A	0.0939071	-0.0047	0.0077	0.0201104	4.16221e-06	0.542	5460	genus.Eisenbergiella.id.11304	FT4	0.00397769	21.7969
rs112205261	T	C	-0.188618	-0.0001	0.0142	0.0403613	3.34648e-06	0.9945	5036	genus.Eggerthella.id.819	FT4	0.00431788	21.8305
rs13070736	A	C	-0.121331	-0.0022	0.0094	0.0272024	7.61915e-06	0.8141	5147	genus.Eggerthella.id.819	FT4	0.00385035	19.8866
rs1784446	G	A	0.0907728	0.0018	0.0066	0.0198096	5.23136e-06	0.7903	5147	genus.Eggerthella.id.819	FT4	0.00406292	20.989
rs2223081	G	A	0.102572	-0.0108	0.0076	0.0221108	3.88889e-06	0.153	5147	genus.Eggerthella.id.819	FT4	0.00416372	21.5119
rs2240838	A	G	0.0980582	0.0058	0.0069	0.0197653	7.36205e-07	0.405	5147	genus.Eggerthella.id.819	FT4	0.00475922	24.6033
rs3851328	T	G	-0.107774	-0.0019	0.0081	0.0236527	4.17589e-06	0.8096	5147	genus.Eggerthella.id.819	FT4	0.0040176	20.754
rs4985746	G	A	0.110522	0.0078	0.008	0.0247653	5.71461e-06	0.3291	4906	genus.Eggerthella.id.819	FT4	0.00404322	19.9084
rs6430926	C	T	0.0879736	-0.0062	0.007	0.0197127	8.37122e-06	0.372	5147	genus.Eggerthella.id.819	FT4	0.0038546	19.9087
rs67490567	T	C	0.108495	0.0013	0.0109	0.0245457	8.94216e-06	0.908	5083	genus.Eggerthella.id.819	FT4	0.00382895	19.5297
rs76663501	C	T	0.175349	0.0281	0.0148	0.0378576	4.82574e-06	0.05735	4814	genus.Eggerthella.id.819	FT4	0.00443674	21.4448
rs11150408	T	G	0.0488254	-0.0136	0.0079	0.0109063	7.05777e-06	0.0838	17215	genus.Dorea.id.1997	FT4	0.00116284	20.0393
rs12537781	T	C	-0.055544	0.0033	0.0075	0.0125223	9.15137e-06	0.6659	17608	genus.Dorea.id.1997	FT4	0.00111612	19.6724
rs13279148	G	A	0.0715309	-0.0008	0.0092	0.0150878	2.25283e-06	0.9271	17605	genus.Dorea.id.1997	FT4	0.00127511	22.4744
rs1899291	C	T	0.0697217	0.0076	0.01	0.0150285	4.56686e-06	0.4477	17609	genus.Dorea.id.1997	FT4	0.00122079	21.5208
rs3005511	A	G	0.0516127	0.0048	0.0068	0.0112852	5.28702e-06	0.4801	17610	genus.Dorea.id.1997	FT4	0.00118636	20.9143
rs345219	T	G	-0.0497368	0.0034	0.0072	0.0112621	8.8006e-06	0.6368	17215	genus.Dorea.id.1997	FT4	0.00113167	19.5015
rs3752849	G	A	0.163846	-0.0094	0.0168	0.036608	7.68057e-06	0.5776	5322	genus.Dorea.id.1997	FT4	0.00374984	20.0242
rs4793307	C	T	0.0574165	-0.0039	0.0075	0.0122472	4.0069e-06	0.6075	17600	genus.Dorea.id.1997	FT4	0.00124723	21.9762
rs62503162	A	G	-0.0974091	-0.0113	0.0113	0.0194379	7.46605e-07	0.3172	16210	genus.Dorea.id.1997	FT4	0.00154684	25.11
rs73729431	C	T	-0.13745	-0.0149	0.0162	0.0299983	3.1674e-06	0.3573	9596	genus.Dorea.id.1997	FT4	0.00218302	20.9897
rs10138457	T	C	-0.113054	0.0168	0.0132	0.0261933	7.88122e-06	0.2014	10968	genus.Dialister.id.2183	FT4	0.00169561	18.6257
rs10938938	G	A	-0.0773514	0.005	0.0085	0.0170915	7.37063e-06	0.5548	11401	genus.Dialister.id.2183	FT4	0.00179331	20.4786
rs11071887	T	C	0.0662403	0.001	0.0084	0.0146315	5.91407e-06	0.9039	11989	genus.Dialister.id.2183	FT4	0.00170664	20.4925
rs11166701	G	A	-0.0655301	0.0018	0.0065	0.013186	5.50746e-07	0.7882	11720	genus.Dialister.id.2183	FT4	0.00210288	24.6934
rs2314294	T	C	0.0865932	0.0054	0.0099	0.0193719	8.07899e-06	0.5862	11339	genus.Dialister.id.2183	FT4	0.00175907	19.9778
rs2435610	A	C	0.0647131	0.0073	0.0077	0.0143314	5.93269e-06	0.343	11984	genus.Dialister.id.2183	FT4	0.0016985	20.3861
rs4747450	C	A	0.0668509	-0.0013	0.0074	0.0147685	5.83729e-06	0.8574	11987	genus.Dialister.id.2183	FT4	0.00170642	20.4864
rs4753063	G	A	-0.0596297	0.0042	0.0066	0.0130052	4.85684e-06	0.5242	11989	genus.Dialister.id.2183	FT4	0.00175044	21.0194
rs75416973	A	G	0.0727223	0.0058	0.0081	0.016451	9.46091e-06	0.471	11402	genus.Dialister.id.2183	FT4	0.00171091	19.5378
rs764177	C	A	-0.0601454	0.0073	0.0071	0.0135366	9.60772e-06	0.303	11988	genus.Dialister.id.2183	FT4	0.00164409	19.7385
rs76680460	G	A	-0.161296	0.0099	0.0171	0.0364332	8.19213e-06	0.5642	7176	genus.Dialister.id.2183	FT4	0.00272387	19.5944
rs12031543	T	C	-0.127185	0.0103	0.0145	0.0281887	6.54764e-06	0.4783	8855	genus.Desulfovibrio.id.3173	FT4	0.00229369	20.3527
rs13066142	G	A	0.119141	0.0034	0.0117	0.0250891	3.78665e-06	0.7738	9241	genus.Desulfovibrio.id.3173	FT4	0.0024343	22.5453
rs16863365	A	G	0.109402	-0.0206	0.0102	0.0226964	1.7945e-06	0.04341	8776	genus.Desulfovibrio.id.3173	FT4	0.00264056	23.2296
rs2032031	A	G	-0.0654931	-0.0034	0.0067	0.0148681	9.14277e-06	0.614	9241	genus.Desulfovibrio.id.3173	FT4	0.00209532	19.3993
rs2590913	G	A	0.154496	-0.0163	0.0155	0.0339396	6.65421e-06	0.2923	7225	genus.Desulfovibrio.id.3173	FT4	0.0028598	20.7156
rs2853179	C	T	0.0811971	-0.0169	0.0082	0.0174234	2.42439e-06	0.03799	8949	genus.Desulfovibrio.id.3173	FT4	0.00242095	21.7128
rs4797774	G	A	0.212582	-0.0009	0.0154	0.0470044	5.64315e-06	0.9548	3476	genus.Desulfovibrio.id.3173	FT4	0.00584988	20.4421
rs6580353	T	C	0.0770979	0.0037	0.008	0.0169735	4.93857e-06	0.645	9241	genus.Desulfovibrio.id.3173	FT4	0.00222768	20.6275
rs72647089	T	G	-0.106594	-0.0102	0.0104	0.0239337	8.29763e-06	0.3252	8985	genus.Desulfovibrio.id.3173	FT4	0.0022028	19.8314
rs7729080	C	A	-0.070287	0.0033	0.007	0.0157691	9.95869e-06	0.6433	9241	genus.Desulfovibrio.id.3173	FT4	0.00214528	19.8628
rs112893842	T	C	0.11381	0.0137	0.0103	0.0232806	1.44535e-06	0.1859	8183	genus.DefluviitaleaceaeUCG011.id.11287	FT4	0.00291203	23.8929
rs1582238	T	C	0.0805036	-0.0043	0.0068	0.0167257	1.56775e-06	0.5288	7983	genus.DefluviitaleaceaeUCG011.id.11287	FT4	0.0028936	23.1609
rs2892880	G	A	0.0817755	-0.0038	0.0077	0.0181686	6.82881e-06	0.623	8182	genus.DefluviitaleaceaeUCG011.id.11287	FT4	0.00246984	20.2533
rs4344384	G	T	0.0715978	-0.0039	0.0066	0.0156309	4.83238e-06	0.5546	8180	genus.DefluviitaleaceaeUCG011.id.11287	FT4	0.00255838	20.9761
rs4677103	A	G	0.0977912	0.0021	0.0109	0.0197263	9.59557e-07	0.8497	7983	genus.DefluviitaleaceaeUCG011.id.11287	FT4	0.00306906	24.5696
rs55658617	T	C	0.174369	-0.0039	0.0192	0.0362226	2.15292e-06	0.8372	6663	genus.DefluviitaleaceaeUCG011.id.11287	FT4	0.00346579	23.1659
rs72731813	C	T	-0.147383	0.0066	0.0133	0.0293796	4.33116e-07	0.6223	7767	genus.DefluviitaleaceaeUCG011.id.11287	FT4	0.00322957	25.1588
rs9608282	T	G	0.142939	-0.0012	0.0139	0.0299793	2.52045e-06	0.9333	7716	genus.DefluviitaleaceaeUCG011.id.11287	FT4	0.00293758	22.7273
rs9725395	A	G	-0.13834	-0.0023	0.0127	0.029554	3.51921e-06	0.8565	8011	genus.DefluviitaleaceaeUCG011.id.11287	FT4	0.00272765	21.9055
rs10810043	A	G	0.0515518	-0.0014	0.0069	0.0115923	9.27424e-06	0.8411	15833	genus.Coprococcus3.id.11303	FT4	0.00124751	19.7739
rs11077359	T	C	-0.0645443	0.0029	0.011	0.0148833	9.63598e-06	0.794	15378	genus.Coprococcus3.id.11303	FT4	0.00122148	18.8044
rs11080344	C	T	0.0516921	0.0032	0.0067	0.0113054	4.78692e-06	0.6321	15835	genus.Coprococcus3.id.11303	FT4	0.00131851	20.9036
rs13247359	G	A	0.051211	-0.0044	0.0071	0.0113031	7.32611e-06	0.5314	15833	genus.Coprococcus3.id.11303	FT4	0.00129481	20.5247
rs13394391	C	T	-0.0709302	0.0022	0.0093	0.0150918	2.20317e-06	0.8162	15834	genus.Coprococcus3.id.11303	FT4	0.00139311	22.0864
rs178271	T	C	0.145257	0.0204	0.0142	0.0294239	7.81088e-07	0.1498	10794	genus.Coprococcus3.id.11303	FT4	0.00225275	24.3665
rs8100692	T	C	0.0577411	0.0025	0.0066	0.0113476	4.16459e-07	0.712	15829	genus.Coprococcus3.id.11303	FT4	0.00163305	25.8885
rs10070053	A	G	0.0594312	0.0066	0.0067	0.0135375	7.64883e-06	0.3306	11473	genus.Coprococcus2.id.11302	FT4	0.00167704	19.2697
rs12634070	T	C	0.0736486	-0.0019	0.0083	0.0164921	9.95104e-06	0.8222	11457	genus.Coprococcus2.id.11302	FT4	0.0017376	19.9388
rs2482516	C	T	0.0754415	0.0128	0.0083	0.0164619	4.72333e-06	0.1232	11483	genus.Coprococcus2.id.11302	FT4	0.00182563	20.9984
rs35890118	A	G	-0.066536	0.0009	0.0073	0.0147661	8.25962e-06	0.9017	11478	genus.Coprococcus2.id.11302	FT4	0.00176583	20.3005
rs61823518	A	C	-0.0955381	-0.0022	0.0123	0.0215724	6.68258e-06	0.8585	10980	genus.Coprococcus2.id.11302	FT4	0.00178311	19.6099
rs6677933	C	T	-0.0804405	0.0009	0.0079	0.0164216	1.18501e-06	0.9137	11483	genus.Coprococcus2.id.11302	FT4	0.00208524	23.9906
rs72680320	T	C	-0.0649382	0.0003	0.0067	0.013919	2.27115e-06	0.9698	11009	genus.Coprococcus2.id.11302	FT4	0.00197323	21.7623
rs9426473	A	G	0.0727361	-0.0053	0.0078	0.0161662	6.30687e-06	0.5011	11486	genus.Coprococcus2.id.11302	FT4	0.00175935	20.24
rs1010560	C	A	0.0580232	0.0035	0.0077	0.0122722	1.95915e-06	0.6493	16723	genus.Coprococcus1.id.11301	FT4	0.00133496	22.3517
rs12794898	G	T	0.0903299	0.0391	0.0128	0.0197212	4.91531e-06	0.002224	15186	genus.Coprococcus1.id.11301	FT4	0.0013796	20.9767
rs1519491	T	C	0.0499197	0.0004	0.007	0.0113558	8.95283e-06	0.9502	16733	genus.Coprococcus1.id.11301	FT4	0.00115355	19.3223
rs1576241	A	G	-0.0510343	-0.0144	0.0066	0.0109535	3.32862e-06	0.02896	16729	genus.Coprococcus1.id.11301	FT4	0.00129595	21.7056
rs1762123	C	T	-0.0891532	0.0055	0.0157	0.0198554	8.01468e-06	0.725	16724	genus.Coprococcus1.id.11301	FT4	0.00120407	20.1588
rs2907920	A	G	0.0561173	-0.0065	0.0091	0.0126824	7.65327e-06	0.4731	16040	genus.Coprococcus1.id.11301	FT4	0.00121915	19.5766
rs4277593	G	A	-0.0585649	-0.0054	0.0067	0.0109914	1.13969e-07	0.4248	16651	genus.Coprococcus1.id.11301	FT4	0.00170213	28.387
rs56405618	A	G	-0.08963	-0.0037	0.0113	0.0186508	1.57195e-06	0.7446	16379	genus.Coprococcus1.id.11301	FT4	0.00140803	23.0918
rs73031725	T	C	0.167591	-0.0256	0.0155	0.0355224	1.97917e-06	0.1001	7206	genus.Coprococcus1.id.11301	FT4	0.00307938	22.2524
rs73167075	T	C	0.0573137	-0.0006	0.0075	0.0127573	8.56864e-06	0.9326	16733	genus.Coprococcus1.id.11301	FT4	0.00120476	20.1812
rs74101919	T	C	-0.0718989	-0.0026	0.0087	0.0144651	1.03291e-06	0.7636	16732	genus.Coprococcus1.id.11301	FT4	0.00147439	24.7029
rs946513	C	T	0.205899	0.0068	0.0174	0.0460018	8.61855e-06	0.6951	4310	genus.Coprococcus1.id.11301	FT4	0.00462666	20.0243
rs11532348	C	T	-0.103931	0.0149	0.0089	0.0226826	5.71184e-06	0.09312	6364	genus.Coprobacter.id.949	FT4	0.00328806	20.9876
rs12684609	T	C	0.100827	0.0003	0.0084	0.0220366	6.10177e-06	0.9696	6364	genus.Coprobacter.id.949	FT4	0.00327873	20.9279
rs12996055	A	C	0.0921817	0.0051	0.0085	0.0209405	8.07639e-06	0.5511	6570	genus.Coprobacter.id.949	FT4	0.00294084	19.3724
rs143662916	C	T	0.253264	-0.0181	0.0151	0.0540141	3.07252e-06	0.2312	3083	genus.Coprobacter.id.949	FT4	0.00708064	21.971
rs189356	G	A	0.0781125	0.0004	0.0072	0.0171916	6.26291e-06	0.9598	6763	genus.Coprobacter.id.949	FT4	0.00304329	20.6385
rs213863	C	T	-0.0887412	-0.0046	0.0072	0.0188377	2.34883e-06	0.5248	6798	genus.Coprobacter.id.949	FT4	0.00325385	22.1853
rs28402691	T	C	0.110695	-0.0184	0.0108	0.0251199	9.55668e-06	0.08822	6387	genus.Coprobacter.id.949	FT4	0.00303115	19.4127
rs305411	A	G	0.129218	-0.004	0.0107	0.0264518	1.00906e-06	0.7073	6777	genus.Coprobacter.id.949	FT4	0.00350893	23.8567
rs3828477	G	T	-0.091218	0.002	0.0079	0.019569	2.88974e-06	0.8004	6798	genus.Coprobacter.id.949	FT4	0.00318606	21.7217
rs72821405	T	C	-0.147365	-0.0052	0.0127	0.0319978	4.7576e-06	0.6812	6177	genus.Coprobacter.id.949	FT4	0.00342203	21.2036
rs74919520	G	A	0.125703	-0.0089	0.0107	0.0276296	5.76326e-06	0.4029	6387	genus.Coprobacter.id.949	FT4	0.00323028	20.6922
rs10890671	T	C	-0.0537401	0.0062	0.0065	0.0118848	6.52136e-06	0.3341	14334	genus.Collinsella.id.815	FT4	0.00142438	20.4433
rs11597285	G	T	-0.0537947	-0.0097	0.0066	0.0120548	9.37615e-06	0.1427	14334	genus.Collinsella.id.815	FT4	0.00138734	19.911
rs1496626	T	C	-0.0722307	0.0128	0.0093	0.01616	6.78175e-06	0.1678	14334	genus.Collinsella.id.815	FT4	0.00139183	19.9755
rs149807560	C	A	-0.104264	0.005	0.0145	0.0235841	7.0987e-06	0.7321	13473	genus.Collinsella.id.815	FT4	0.00144857	19.5419
rs2103510	G	A	0.0786551	-0.001	0.0095	0.0168217	2.42474e-06	0.9135	14334	genus.Collinsella.id.815	FT4	0.00152295	21.8602
rs62448871	C	A	-0.0540309	-0.005	0.0069	0.0120324	6.78253e-06	0.4668	14334	genus.Collinsella.id.815	FT4	0.00140476	20.1613
rs73052258	G	A	0.0930178	0.0069	0.0126	0.0202658	1.7158e-06	0.5815	14334	genus.Collinsella.id.815	FT4	0.00146757	21.0641
rs75672793	A	G	-0.108908	0.0047	0.0127	0.0240522	6.13549e-06	0.7119	12601	genus.Collinsella.id.815	FT4	0.00162443	20.4995
rs9541268	C	A	0.09597	0.0173	0.0108	0.0197312	8.79419e-07	0.1103	12914	genus.Collinsella.id.815	FT4	0.00182855	23.6535
rs11264403	G	A	-0.139062	0.0074	0.0179	0.0334454	7.75544e-06	0.6806	7285	genus.Clostridiumsensustricto1.id.1873	FT4	0.00236745	17.2831
rs115807074	A	G	-0.22736	-0.0035	0.0175	0.0492575	4.31688e-06	0.8416	4229	genus.Clostridiumsensustricto1.id.1873	FT4	0.00501259	21.295
rs116847295	C	T	0.110021	0.0053	0.0136	0.0246032	4.58118e-06	0.6994	12910	genus.Clostridiumsensustricto1.id.1873	FT4	0.00154659	19.9943
rs12341505	G	A	0.0810718	-0.0106	0.0101	0.0180121	4.82174e-06	0.2973	14118	genus.Clostridiumsensustricto1.id.1873	FT4	0.00143289	20.2558
rs2795528	G	A	-0.184315	-0.0253	0.0164	0.0392204	2.7204e-06	0.1235	6366	genus.Clostridiumsensustricto1.id.1873	FT4	0.0034572	22.078
rs2817172	C	T	0.058139	-0.0018	0.0072	0.0124492	2.76655e-06	0.8016	13658	genus.Clostridiumsensustricto1.id.1873	FT4	0.0015943	21.8065
rs550843	T	C	-0.0783246	0.0025	0.0103	0.0169209	2.05071e-06	0.8099	14102	genus.Clostridiumsensustricto1.id.1873	FT4	0.00151708	21.4233
rs10461257	A	G	-0.0551969	-0.0133	0.009	0.0122069	6.50746e-06	0.1408	15987	genus.ChristensenellaceaeR.7group.id	FT4	0.00127731	20.4439
rs17081797	A	G	-0.0904325	-0.0096	0.013	0.0204253	3.34031e-06	0.4616	16324	genus.ChristensenellaceaeR.7group.id	FT4	0.0011994	19.6001
rs60954665	T	G	0.049815	-0.0052	0.0065	0.0110787	7.13177e-06	0.4282	16324	genus.ChristensenellaceaeR.7group.id	FT4	0.00123702	20.2156
rs62132810	A	G	-0.0828853	-0.0296	0.0175	0.0179623	5.66711e-06	0.08983	15066	genus.ChristensenellaceaeR.7group.id	FT4	0.00141131	21.29
rs62190261	A	C	0.0958394	0.0087	0.0138	0.0214723	8.74023e-06	0.5276	15274	genus.ChristensenellaceaeR.7group.id	FT4	0.00130261	19.9193
rs62467127	C	T	0.114108	-0.0164	0.0142	0.0251983	3.25362e-06	0.2459	12719	genus.ChristensenellaceaeR.7group.id	FT4	0.00160968	20.5033
rs73952017	C	T	-0.0862164	0.0081	0.0119	0.0194354	8.45769e-06	0.4952	15274	genus.ChristensenellaceaeR.7group.id	FT4	0.00128671	19.676
rs78521377	C	T	0.124992	-0.0188	0.0139	0.0274797	5.60674e-06	0.1775	12605	genus.ChristensenellaceaeR.7group.id	FT4	0.00163864	20.6857
rs79150079	C	A	0.121547	0.0017	0.0141	0.0270977	9.41804e-06	0.904	11994	genus.ChristensenellaceaeR.7group.id	FT4	0.00167466	20.1163
rs892686	A	G	0.0514099	-0.0003	0.0065	0.011136	3.96861e-06	0.9605	16325	genus.ChristensenellaceaeR.7group.id	FT4	0.00130382	21.31
rs12404911	C	T	0.140717	0.0032	0.0083	0.0304142	2.79891e-06	0.6949	3239	genus.Catenibacterium.id.2153	FT4	0.00656552	21.3931
rs212393	G	A	-0.135254	0.0149	0.0073	0.0286209	3.62489e-06	0.04188	3239	genus.Catenibacterium.id.2153	FT4	0.0068476	22.3185
rs73128290	A	G	0.129726	0.0136	0.0074	0.0284563	4.29372e-06	0.06655	3239	genus.Catenibacterium.id.2153	FT4	0.00637546	20.7698
rs77285108	G	A	-0.161826	0.002	0.0106	0.0353447	3.6268e-06	0.8525	3210	genus.Catenibacterium.id.2153	FT4	0.0064881	20.9497
rs7742829	C	T	0.11411	-0.0009	0.0067	0.0251099	5.60729e-06	0.8885	3239	genus.Catenibacterium.id.2153	FT4	0.0063356	20.6391
rs10090365	A	G	-0.0834413	-0.0016	0.0068	0.0180989	4.17309e-06	0.8128	6145	genus.CandidatusSoleaferrea.id.11350	FT4	0.00344697	21.248
rs10108780	A	G	-0.092834	-0.0043	0.0076	0.0199807	3.64079e-06	0.5762	5999	genus.CandidatusSoleaferrea.id.11350	FT4	0.00358555	21.5799
rs10809135	T	C	0.0834858	0.0154	0.007	0.0182426	5.47174e-06	0.02824	5999	genus.CandidatusSoleaferrea.id.11350	FT4	0.00347903	20.9366
rs4294381	T	C	0.112197	0.0005	0.0083	0.023186	1.3685e-06	0.9494	6145	genus.CandidatusSoleaferrea.id.11350	FT4	0.00379606	23.4081
rs4678258	T	C	0.0986136	-0.0055	0.0078	0.0215646	5.53183e-06	0.4846	6101	genus.CandidatusSoleaferrea.id.11350	FT4	0.00341588	20.9049
rs6489992	A	G	-0.0840437	-0.004	0.0069	0.0187031	7.88786e-06	0.5616	6142	genus.CandidatusSoleaferrea.id.11350	FT4	0.0032768	20.1857
rs6494306	A	G	-0.0969304	0.0163	0.0079	0.0214221	5.80051e-06	0.03899	6145	genus.CandidatusSoleaferrea.id.11350	FT4	0.0033207	20.467
rs7400877	T	C	-0.0951085	0.0011	0.0076	0.0212799	9.29448e-06	0.8898	6145	genus.CandidatusSoleaferrea.id.11350	FT4	0.00324017	19.9691
rs9973954	A	G	0.0892075	-0.0004	0.0076	0.0195401	5.94796e-06	0.9598	6145	genus.CandidatusSoleaferrea.id.11350	FT4	0.0033803	20.8356
rs1007475	G	T	0.118065	-0.0022	0.0071	0.0261271	7.92312e-06	0.7523	3482	genus.Butyrivibrio.id.1993	FT4	0.00583036	20.4086
rs11761679	T	C	0.154775	0.0082	0.0088	0.0321539	2.20231e-06	0.349	3482	genus.Butyrivibrio.id.1993	FT4	0.00661038	23.1572
rs16934069	T	C	-0.133784	-0.008	0.0084	0.0299444	8.8591e-06	0.3408	3482	genus.Butyrivibrio.id.1993	FT4	0.00569991	19.9494
rs17163238	G	A	0.140987	0.0032	0.0085	0.0309117	5.51196e-06	0.71	3482	genus.Butyrivibrio.id.1993	FT4	0.00593876	20.7904
rs4537857	T	C	-0.12459	-0.0104	0.0072	0.0260992	1.80192e-06	0.1456	3482	genus.Butyrivibrio.id.1993	FT4	0.00650203	22.7752
rs486484	A	G	-0.108349	-0.0122	0.0066	0.0240008	6.61084e-06	0.06311	3456	genus.Butyrivibrio.id.1993	FT4	0.00586231	20.3678
rs4928024	A	G	-0.17471	0.0212	0.011	0.0389333	8.18641e-06	0.05479	3481	genus.Butyrivibrio.id.1993	FT4	0.00575155	20.1254
rs74622183	A	G	-0.201027	-0.0047	0.012	0.0428204	2.45748e-06	0.6966	3478	genus.Butyrivibrio.id.1993	FT4	0.00629702	22.0272
rs77356209	T	C	0.216874	-0.0005	0.0139	0.0483299	6.6643e-06	0.969	3379	genus.Butyrivibrio.id.1993	FT4	0.00592401	20.1246
rs7752361	A	G	-0.11923	-0.0106	0.0066	0.0239975	7.69113e-07	0.1081	3481	genus.Butyrivibrio.id.1993	FT4	0.00704156	24.6713
rs7763512	G	A	0.119846	-0.0097	0.0067	0.0253367	3.10655e-06	0.1487	3259	genus.Butyrivibrio.id.1993	FT4	0.0068185	22.3603
rs9349693	A	G	0.117973	-0.0067	0.0071	0.0259861	5.54958e-06	0.343	3482	genus.Butyrivibrio.id.1993	FT4	0.00588424	20.5984
rs11228830	A	G	0.135265	0.0067	0.0135	0.0298411	6.55162e-06	0.6225	8974	genus.Butyricimonas.id.945	FT4	0.00228434	20.542
rs113054641	G	A	-0.144881	-0.0105	0.0121	0.0274574	1.73694e-07	0.3875	9949	genus.Butyricimonas.id.945	FT4	0.00279069	27.8367
rs12304031	G	A	-0.086278	-0.0076	0.0102	0.0196846	6.70067e-06	0.457	10658	genus.Butyricimonas.id.945	FT4	0.00179924	19.2072
rs12458763	A	C	0.122037	0.0098	0.0131	0.0269587	6.36646e-06	0.4524	10383	genus.Butyricimonas.id.945	FT4	0.00196972	20.488
rs1862649	G	A	0.113124	0.0025	0.0115	0.0248176	4.76256e-06	0.8255	10123	genus.Butyricimonas.id.945	FT4	0.00204828	20.7732
rs2114713	G	T	0.062721	-0.0037	0.0066	0.0138998	6.87713e-06	0.5798	10734	genus.Butyricimonas.id.945	FT4	0.00189333	20.3577
rs62130338	G	A	-0.0732608	-0.015	0.0091	0.0158324	3.8981e-06	0.09742	10557	genus.Butyricimonas.id.945	FT4	0.00202409	21.4076
rs62390301	T	C	-0.0872983	-0.0032	0.0086	0.0174893	7.41905e-07	0.7101	10634	genus.Butyricimonas.id.945	FT4	0.00233752	24.9107
rs7083431	A	C	0.0703539	-0.0037	0.0069	0.0144439	8.8546e-07	0.5943	10737	genus.Butyricimonas.id.945	FT4	0.0022048	23.7208
rs71428626	G	T	-0.133188	-0.0067	0.0141	0.0289905	4.80413e-06	0.6349	9776	genus.Butyricimonas.id.945	FT4	0.00215438	21.1024
rs72814525	A	G	0.0664154	0.0029	0.007	0.0149766	8.24599e-06	0.6801	10736	genus.Butyricimonas.id.945	FT4	0.0018284	19.662
rs78453362	A	G	-0.14948	0.0148	0.0147	0.0327073	4.0581e-06	0.3113	8207	genus.Butyricimonas.id.945	FT4	0.00253858	20.882
rs9657374	C	T	0.0680719	-0.0151	0.0071	0.0148172	4.50359e-06	0.03454	10737	genus.Butyricimonas.id.945	FT4	0.00196185	21.1018
rs10084203	A	G	0.0549699	-0.0141	0.0078	0.0123563	8.58646e-06	0.06875	17135	genus.Butyricicoccus.id.2055	FT4	0.00115369	19.789
rs12034718	A	G	0.0701199	-0.0229	0.0091	0.0158213	9.57686e-06	0.01182	16237	genus.Butyricicoccus.id.2055	FT4	0.00120827	19.64
rs12585793	T	C	-0.262206	0.0153	0.0159	0.0564729	5.79191e-06	0.3357	3135	genus.Butyricicoccus.id.2055	FT4	0.00682955	21.5441
rs2017189	G	T	-0.0506956	-0.0027	0.007	0.011024	3.87256e-06	0.7044	17133	genus.Butyricicoccus.id.2055	FT4	0.0012328	21.1451
rs4962426	G	T	0.0614216	-0.0129	0.0089	0.0135979	7.3849e-06	0.1476	16889	genus.Butyricicoccus.id.2055	FT4	0.00120662	20.4007
rs56221232	T	C	0.0828027	-0.0042	0.011	0.0167401	7.6194e-07	0.701	17133	genus.Butyricicoccus.id.2055	FT4	0.00142601	24.4638
rs7322368	T	C	0.0815733	0.005	0.0112	0.0183167	5.5178e-06	0.6562	17134	genus.Butyricicoccus.id.2055	FT4	0.00115623	19.8314
rs11149971	C	T	0.117605	-0.0073	0.0148	0.02339	1.03934e-06	0.6194	16255	genus.Blautia.id.1992	FT4	0.00155285	25.2777
rs113271346	C	T	0.0782682	-0.0049	0.0107	0.0172116	6.85386e-06	0.6481	17465	genus.Blautia.id.1992	FT4	0.00118262	20.6765
rs115043014	G	A	-0.206605	-0.0317	0.0179	0.043992	5.186e-06	0.0762	4902	genus.Blautia.id.1992	FT4	0.00447934	22.0475
rs117001700	T	C	0.196414	0.0118	0.0175	0.0441122	8.83912e-06	0.5013	4965	genus.Blautia.id.1992	FT4	0.00397721	19.8177
rs12453000	C	T	0.0625335	0.006	0.0086	0.0129987	1.26117e-06	0.488	17815	genus.Blautia.id.1992	FT4	0.0012974	23.1406
rs16892041	T	C	-0.0622605	-0.001	0.0089	0.0141804	8.82028e-06	0.9091	18276	genus.Blautia.id.1992	FT4	0.00105368	19.2753
rs2788271	T	G	-0.0575596	0.0126	0.0086	0.0133492	7.16388e-06	0.1417	18276	genus.Blautia.id.1992	FT4	0.00101626	18.59
rs3005511	A	G	0.0501085	0.0048	0.0068	0.0110768	6.18905e-06	0.4801	18276	genus.Blautia.id.1992	FT4	0.00111848	20.4621
rs4926264	T	C	0.0826207	-0.0066	0.0133	0.0178239	5.10293e-06	0.6182	18276	genus.Blautia.id.1992	FT4	0.0011743	21.4844
rs67794373	C	T	0.0601709	-0.002	0.0077	0.0123443	1.00003e-06	0.7961	18158	genus.Blautia.id.1992	FT4	0.00130679	23.7571
rs682885	A	G	-0.0493376	0.0057	0.0066	0.0107359	4.4908e-06	0.386	18274	genus.Blautia.id.1992	FT4	0.00115437	21.117
rs11069458	T	C	-0.0680947	0.0061	0.0084	0.015503	7.71547e-06	0.4632	12856	genus.Bilophila.id.3170	FT4	0.00149843	19.2898
rs1241171	G	A	-0.0692654	-0.0102	0.0078	0.0150148	4.24037e-06	0.1924	12856	genus.Bilophila.id.3170	FT4	0.0016526	21.2777
rs1571225	C	T	0.0826826	0.0075	0.0097	0.0170621	1.12289e-06	0.4345	12854	genus.Bilophila.id.3170	FT4	0.0018236	23.4797
rs1969927	G	A	0.0564589	0.0118	0.0074	0.0126935	9.0722e-06	0.1126	12777	genus.Bilophila.id.3170	FT4	0.00154597	19.7804
rs2728491	G	T	-0.0627416	-0.0001	0.0073	0.0139456	6.33255e-06	0.9939	12856	genus.Bilophila.id.3170	FT4	0.00157197	20.2379
rs3827020	C	T	0.0766479	0.0049	0.0113	0.0160642	1.78875e-06	0.6674	12628	genus.Bilophila.id.3170	FT4	0.00179955	22.7621
rs4798126	G	A	0.073288	0.0053	0.0093	0.016799	7.14662e-06	0.5663	12777	genus.Bilophila.id.3170	FT4	0.00148739	19.0297
rs542415	T	C	-0.0613623	0.0078	0.0071	0.0133436	4.70948e-06	0.271	12777	genus.Bilophila.id.3170	FT4	0.00165238	21.1441
rs60178956	G	A	-0.0624818	0.0031	0.0077	0.0141485	8.05619e-06	0.6902	12777	genus.Bilophila.id.3170	FT4	0.00152403	19.4993
rs6793291	C	A	0.112729	0.0169	0.0127	0.0241633	3.1132e-06	0.182	11051	genus.Bilophila.id.3170	FT4	0.00196564	21.7611
rs72676854	T	C	0.123209	0.0014	0.0134	0.026882	5.62268e-06	0.9154	11616	genus.Bilophila.id.3170	FT4	0.00180517	21.0031
rs7802841	C	A	0.0670097	-0.0084	0.007	0.0137701	1.76952e-06	0.2301	12856	genus.Bilophila.id.3170	FT4	0.00183865	23.6775
rs9899990	A	G	-0.102702	-0.0027	0.0128	0.0233878	9.06691e-06	0.8356	12088	genus.Bilophila.id.3170	FT4	0.0015927	19.2801
rs12022129	G	A	0.0619356	0.0019	0.0081	0.0138937	7.99643e-06	0.8118	14776	genus.Bifidobacterium.id.436	FT4	0.00134308	19.8693
rs182549	C	T	0.119703	-0.0179	0.0081	0.0127294	1.27822e-20	0.02684	14778	genus.Bifidobacterium.id.436	FT4	0.0059483	88.418
rs2491158	G	A	0.0712624	-0.008	0.0089	0.015983	8.04716e-06	0.3686	14021	genus.Bifidobacterium.id.436	FT4	0.00141583	19.8766
rs2686790	T	C	0.070741	-0.0063	0.0097	0.0157926	7.49893e-06	0.5119	14778	genus.Bifidobacterium.id.436	FT4	0.00135591	20.0621
rs540489	T	G	-0.0637641	0.0148	0.0084	0.0138746	5.19458e-06	0.07863	14561	genus.Bifidobacterium.id.436	FT4	0.00144841	21.118
rs55888705	A	G	0.0546319	0.0064	0.007	0.0121139	6.67019e-06	0.3647	14777	genus.Bifidobacterium.id.436	FT4	0.0013745	20.3362
rs56108664	T	C	0.0729971	0.0265	0.0094	0.0157926	2.4402e-06	0.004698	13916	genus.Bifidobacterium.id.436	FT4	0.00153294	21.362
rs5746486	T	C	-0.0536216	0.0101	0.0067	0.0120801	8.99955e-06	0.1324	14778	genus.Bifidobacterium.id.436	FT4	0.00133152	19.7008
rs62181700	G	A	-0.0624643	0.0073	0.0078	0.0131205	2.17246e-06	0.3519	14774	genus.Bifidobacterium.id.436	FT4	0.00153179	22.6622
rs7322849	T	C	0.112428	0.0031	0.0132	0.0201813	1.08368e-08	0.8158	14778	genus.Bifidobacterium.id.436	FT4	0.0020957	31.0311
rs73797465	T	G	-0.0953566	-0.0042	0.0146	0.0209237	4.38162e-06	0.773	14666	genus.Bifidobacterium.id.436	FT4	0.00141417	20.7667
rs75344046	C	T	0.232354	0.0092	0.0195	0.0505979	4.86354e-06	0.6378	3856	genus.Bifidobacterium.id.436	FT4	0.00543914	21.0771
rs857444	C	T	0.0558234	-0.0031	0.0069	0.0121219	3.57097e-06	0.6556	14777	genus.Bifidobacterium.id.436	FT4	0.00143311	21.2047
rs11155559	T	C	0.0956023	0.0107	0.0112	0.0212961	8.91914e-06	0.343	13383	genus.Barnesiella.id.944	FT4	0.00150359	20.1499
rs113258194	A	G	0.098992	0.024	0.0128	0.0214121	7.31119e-06	0.06159	13945	genus.Barnesiella.id.944	FT4	0.00153038	21.3708
rs12909713	C	T	-0.0550716	0.0058	0.0065	0.0120039	4.94527e-06	0.3759	14205	genus.Barnesiella.id.944	FT4	0.00147954	21.045
rs13242616	T	C	-0.0583747	0.0019	0.0083	0.0123176	2.29017e-06	0.8161	13945	genus.Barnesiella.id.944	FT4	0.00160798	22.4562
rs199035	G	A	0.0559495	-0.0134	0.0067	0.0119716	3.00294e-06	0.0447	13945	genus.Barnesiella.id.944	FT4	0.00156384	21.8388
rs2276875	A	G	-0.0697176	-0.0157	0.0091	0.0139537	4.65027e-07	0.08295	13893	genus.Barnesiella.id.944	FT4	0.00179362	24.9599
rs2428166	G	A	-0.165859	0.0063	0.017	0.0337309	8.50874e-07	0.7105	8091	genus.Barnesiella.id.944	FT4	0.00297936	24.172
rs35177866	A	G	0.0917125	0.0326	0.0124	0.0190133	2.94763e-06	0.008899	13394	genus.Barnesiella.id.944	FT4	0.00173411	23.2635
rs60316894	C	T	-0.121478	-0.0017	0.0162	0.025184	1.19064e-06	0.9161	12717	genus.Barnesiella.id.944	FT4	0.00182629	23.2637
rs62251337	A	G	-0.0690763	-0.007	0.0082	0.0149374	4.24161e-06	0.3966	13945	genus.Barnesiella.id.944	FT4	0.00153117	21.3818
rs72684847	T	C	-0.114369	-0.007	0.014	0.0253873	6.76169e-06	0.6156	12984	genus.Barnesiella.id.944	FT4	0.00156062	20.2917
rs76181748	C	T	-0.0778559	0.004	0.0095	0.017164	6.7766e-06	0.6696	14201	genus.Barnesiella.id.944	FT4	0.00144677	20.5724
rs77455852	T	G	-0.0891491	0.0183	0.0152	0.0195601	3.16354e-06	0.2279	13394	genus.Barnesiella.id.944	FT4	0.0015485	20.7696
rs79795328	A	G	-0.0818645	-0.002	0.0098	0.0176441	4.23302e-06	0.838	13657	genus.Barnesiella.id.944	FT4	0.00157382	21.5243
rs11585893	A	G	-0.0740746	0.0089	0.0102	0.0147633	1.79511e-06	0.3834	17821	genus.Bacteroides.id.918	FT4	0.00141067	25.1722
rs13207588	A	G	-0.059205	-0.0075	0.0096	0.0131195	7.48504e-06	0.4329	17707	genus.Bacteroides.id.918	FT4	0.00114879	20.3627
rs1340391	T	C	-0.0592004	-0.0012	0.0081	0.0132244	6.7301e-06	0.8828	18302	genus.Bacteroides.id.918	FT4	0.00109376	20.0377
rs17619981	T	G	0.0880978	0.0034	0.0112	0.0187002	2.68683e-06	0.7597	15801	genus.Bacteroides.id.918	FT4	0.00140263	22.1913
rs2023437	T	C	-0.0782325	-0.0033	0.0105	0.0167634	5.01824e-06	0.7561	17484	genus.Bacteroides.id.918	FT4	0.00124414	21.7771
rs66474973	G	T	0.0812515	0.0041	0.0103	0.0164479	6.80966e-07	0.6895	17405	genus.Bacteroides.id.918	FT4	0.0014001	24.4001
rs66710942	C	T	0.0488038	-0.0093	0.0069	0.0107412	5.86259e-06	0.1779	17821	genus.Bacteroides.id.918	FT4	0.00115709	20.642
rs6795673	C	T	0.0538565	0.0024	0.0066	0.0105251	3.37909e-07	0.7115	18301	genus.Bacteroides.id.918	FT4	0.00142865	26.1803
rs9507307	C	T	0.0604456	0.0033	0.0095	0.0129128	2.1271e-06	0.729	18184	genus.Bacteroides.id.918	FT4	0.00120359	21.91
rs10150232	A	G	0.0567088	-0.0031	0.0074	0.0124877	6.67667e-06	0.6757	16117	genus.Anaerotruncus.id.2054	FT4	0.0012779	20.6197
rs11018566	A	G	-0.156465	0.0091	0.0155	0.0366032	6.13709e-06	0.56	6278	genus.Anaerotruncus.id.2054	FT4	0.00290211	18.2666
rs115414803	A	C	-0.144356	-0.0052	0.0174	0.0317524	6.83473e-06	0.7656	9273	genus.Anaerotruncus.id.2054	FT4	0.00222397	20.6644
rs1272208	G	T	-0.0611743	0.0052	0.0077	0.0129831	4.27982e-06	0.5028	16117	genus.Anaerotruncus.id.2054	FT4	0.00137563	22.1988
rs1431492	C	T	-0.0654996	0.01	0.009	0.0146188	7.35565e-06	0.2693	16560	genus.Anaerotruncus.id.2054	FT4	0.00121079	20.0725
rs17734739	T	C	0.0660052	-0.0112	0.0088	0.014908	7.42772e-06	0.207	15927	genus.Anaerotruncus.id.2054	FT4	0.00122927	19.6002
rs4669806	G	T	0.0576389	0.0052	0.0076	0.0122994	2.4206e-06	0.4965	16566	genus.Anaerotruncus.id.2054	FT4	0.00132395	21.9589
rs6494922	A	G	0.0903106	0.0147	0.0126	0.0202257	6.62362e-06	0.2408	16067	genus.Anaerotruncus.id.2054	FT4	0.00123937	19.9351
rs6563550	T	C	0.0877135	-0.0111	0.0118	0.0176745	2.34517e-07	0.3469	16566	genus.Anaerotruncus.id.2054	FT4	0.00148449	24.6256
rs7155595	C	A	0.0539336	0.0052	0.0072	0.0118903	7.54982e-06	0.4685	16553	genus.Anaerotruncus.id.2054	FT4	0.00124142	20.5722
rs8005030	C	T	0.0554447	-0.0105	0.0071	0.0117854	2.28298e-06	0.1372	16548	genus.Anaerotruncus.id.2054	FT4	0.00133568	22.1297
rs9347879	T	C	0.050618	-0.006	0.0066	0.011049	4.22333e-06	0.3663	16566	genus.Anaerotruncus.id.2054	FT4	0.00126531	20.9851
rs10502061	A	G	0.0835752	0.0049	0.0116	0.0192017	7.93539e-06	0.6752	16825	genus.Anaerostipes.id.1991	FT4	0.00112469	18.942
rs2014785	T	C	0.0515687	0.004	0.0068	0.0112199	4.68061e-06	0.556	16445	genus.Anaerostipes.id.1991	FT4	0.00128294	21.1224
rs2396460	T	C	-0.0512653	0.0024	0.007	0.0109555	2.91088e-06	0.726	16912	genus.Anaerostipes.id.1991	FT4	0.00129307	21.8941
rs2804244	A	G	-0.053089	-0.0108	0.0065	0.0110983	2.04051e-06	0.09993	16926	genus.Anaerostipes.id.1991	FT4	0.00135007	22.8795
rs3900776	G	A	-0.110013	0.0172	0.0136	0.0236302	2.74765e-06	0.2043	14694	genus.Anaerostipes.id.1991	FT4	0.00147291	21.6719
rs62157625	T	C	0.088573	0.0067	0.0123	0.0185548	1.44909e-06	0.5847	15215	genus.Anaerostipes.id.1991	FT4	0.00149544	22.7842
rs62215703	G	A	0.0644965	0.0033	0.0081	0.0136702	1.9777e-06	0.6841	15550	genus.Anaerostipes.id.1991	FT4	0.00142946	22.2571
rs6474958	A	G	-0.0500065	-0.0045	0.0066	0.0112001	6.74483e-06	0.4978	16918	genus.Anaerostipes.id.1991	FT4	0.00117693	19.9324
rs6726833	C	A	-0.0877497	-0.0145	0.0132	0.0189408	3.32217e-06	0.2702	16924	genus.Anaerostipes.id.1991	FT4	0.0012666	21.4606
rs6854026	T	C	-0.0508482	-0.0008	0.0067	0.0109075	3.19578e-06	0.9042	16921	genus.Anaerostipes.id.1991	FT4	0.00128267	21.7294
rs7193624	C	T	0.0750642	0.0027	0.009	0.0150723	5.35482e-07	0.7653	16926	genus.Anaerostipes.id.1991	FT4	0.00146324	24.8001
rs78735375	A	C	-0.137429	0.0202	0.0189	0.0305304	5.33384e-06	0.2871	10360	genus.Anaerostipes.id.1991	FT4	0.001952	20.2584
rs10794359	T	C	-0.0953524	-0.0053	0.0077	0.02006	2.23496e-06	0.4909	4994	genus.Anaerofilum.id.2053	FT4	0.00450395	22.5854
rs1563175	A	C	0.0923834	0.0064	0.0069	0.0202157	5.53848e-06	0.3551	5051	genus.Anaerofilum.id.2053	FT4	0.00411757	20.8755
rs17012738	T	G	0.0903417	-0.0036	0.0068	0.0200239	7.24168e-06	0.5966	5051	genus.Anaerofilum.id.2053	FT4	0.00401378	20.3472
rs17096874	C	T	-0.126337	0.0072	0.009	0.0268919	2.8603e-06	0.423	5051	genus.Anaerofilum.id.2053	FT4	0.00435058	22.062
rs356049	G	A	0.132603	-0.0201	0.0122	0.0289802	6.55844e-06	0.09944	4994	genus.Anaerofilum.id.2053	FT4	0.00417482	20.9281
rs4244069	G	A	-0.146775	-0.0111	0.0106	0.0326594	9.81202e-06	0.2986	5030	genus.Anaerofilum.id.2053	FT4	0.00399923	20.1888
rs4506496	G	A	0.10309	-0.0048	0.0069	0.0212861	1.4866e-06	0.4905	4935	genus.Anaerofilum.id.2053	FT4	0.00473034	23.4457
rs712981	A	C	0.10076	-0.0088	0.0067	0.0202902	6.83115e-07	0.1852	5051	genus.Anaerofilum.id.2053	FT4	0.00485854	24.6505
rs79598899	C	T	0.182586	-0.042	0.0146	0.0357284	3.74728e-07	0.003905	4709	genus.Anaerofilum.id.2053	FT4	0.00551538	26.1049
rs816292	T	C	-0.113003	0.0014	0.0072	0.02204	2.64038e-07	0.85	5017	genus.Anaerofilum.id.2053	FT4	0.00521241	26.2772
rs9299345	T	C	-0.1364	-0.0072	0.0095	0.0302372	8.04309e-06	0.448	5051	genus.Anaerofilum.id.2053	FT4	0.00401255	20.341
rs12675596	G	T	0.145669	-0.0082	0.0076	0.0290678	9.63726e-07	0.2762	3008	genus.Alloprevotella.id.961	FT4	0.00827981	25.0969
rs2154444	T	G	0.138234	-0.0064	0.0081	0.0308961	8.36755e-06	0.4266	3009	genus.Alloprevotella.id.961	FT4	0.00660881	20.0049
rs34619204	G	A	-0.156037	0.0025	0.0086	0.0344392	8.8419e-06	0.7677	3003	genus.Alloprevotella.id.961	FT4	0.00678943	20.5144
rs4364940	A	G	0.126418	-0.0047	0.0074	0.0282207	8.58353e-06	0.5286	3008	genus.Alloprevotella.id.961	FT4	0.00662695	20.0535
rs4680035	A	G	-0.119599	-0.0003	0.0065	0.0259446	4.99052e-06	0.9596	3007	genus.Alloprevotella.id.961	FT4	0.00701735	21.2361
rs58212166	A	G	-0.161506	0.0116	0.0107	0.0359102	7.93614e-06	0.2795	3005	genus.Alloprevotella.id.961	FT4	0.00668624	20.2139
rs1901739	T	G	0.115769	0.0068	0.0066	0.0248626	3.58801e-06	0.3017	3212	genus.Allisonella.id.2174	FT4	0.00670486	21.6679
rs35110698	T	C	-0.146322	-0.0137	0.0088	0.0320852	5.72322e-06	0.1181	3212	genus.Allisonella.id.2174	FT4	0.00643326	20.7845
rs35778461	C	T	0.146679	0.0108	0.0084	0.0297186	1.2063e-06	0.2006	3212	genus.Allisonella.id.2174	FT4	0.007527	24.3449
rs594561	C	T	0.112231	-0.0051	0.0066	0.0251681	9.41103e-06	0.4399	3212	genus.Allisonella.id.2174	FT4	0.00615272	19.8725
rs602075	A	G	0.168974	-0.0052	0.0076	0.0296976	3.56575e-08	0.4895	3212	genus.Allisonella.id.2174	FT4	0.00997858	32.3541
rs6742198	G	A	0.149152	-0.0043	0.0091	0.0316484	3.34514e-06	0.6372	3182	genus.Allisonella.id.2174	FT4	0.00693158	22.1963
rs76904847	G	A	0.148523	0.0037	0.0114	0.0334857	6.08751e-06	0.7442	3182	genus.Allisonella.id.2174	FT4	0.00614462	19.6607
rs7898615	T	G	0.167966	0.0014	0.011	0.0373586	8.87277e-06	0.8997	3212	genus.Allisonella.id.2174	FT4	0.00625407	20.2019
rs1107244	G	A	0.0758558	-0.0112	0.0118	0.0171182	3.59059e-06	0.3439	17571	genus.Alistipes.id.968	FT4	0.00111629	19.6341
rs11769002	G	A	-0.0528793	-0.0022	0.0068	0.0109389	1.44962e-06	0.7444	17571	genus.Alistipes.id.968	FT4	0.00132817	23.3657
rs11958296	A	G	-0.0981222	-0.0038	0.013	0.0218272	9.29574e-06	0.7726	16214	genus.Alistipes.id.968	FT4	0.00124482	20.2062
rs12990744	C	T	-0.0776618	-0.0154	0.0125	0.0172986	8.20725e-06	0.217	16694	genus.Alistipes.id.968	FT4	0.0012059	20.1531
rs1689282	A	C	-0.0520061	0.016	0.0069	0.0113942	5.27578e-06	0.02123	17090	genus.Alistipes.id.968	FT4	0.00121751	20.8301
rs2290844	C	T	0.0813969	0.0246	0.012	0.0191632	9.10135e-06	0.03919	17571	genus.Alistipes.id.968	FT4	0.00102574	18.0398
rs2450745	A	C	-0.080524	-0.018	0.0112	0.0184702	7.11836e-06	0.1083	17571	genus.Alistipes.id.968	FT4	0.00108054	19.0046
rs2875322	T	C	-0.0580945	-0.0068	0.0081	0.0131432	8.77703e-06	0.4007	17459	genus.Alistipes.id.968	FT4	0.00111779	19.5351
rs34417064	A	G	-0.048202	-0.002	0.0065	0.0106868	7.00749e-06	0.7516	17570	genus.Alistipes.id.968	FT4	0.00115653	20.3414
rs4810359	A	G	-0.0652428	-0.0017	0.0088	0.0146155	7.49669e-06	0.8484	17380	genus.Alistipes.id.968	FT4	0.00114522	19.9244
rs62576416	T	C	0.0492647	-0.0018	0.0066	0.0109733	7.50368e-06	0.7872	17564	genus.Alistipes.id.968	FT4	0.00114624	20.1534
rs67705352	T	G	-0.0532404	0.0133	0.0068	0.0110864	1.65123e-06	0.04968	17567	genus.Alistipes.id.968	FT4	0.00131109	23.0596
rs7129639	C	A	-0.0524955	-0.001	0.0067	0.0109584	1.78422e-06	0.8764	17571	genus.Alistipes.id.968	FT4	0.00130433	22.9458
rs8130320	A	G	-0.049002	0.0013	0.0065	0.010717	4.83612e-06	0.8473	17571	genus.Alistipes.id.968	FT4	0.00118841	20.904
rs117107102	A	G	0.204406	0.0151	0.0177	0.0431629	3.01139e-06	0.3944	4974	genus.Akkermansia.id.4037	FT4	0.00448856	22.4178
rs11729256	T	C	0.0750473	-0.0159	0.0078	0.0150184	6.58393e-07	0.04195	11860	genus.Akkermansia.id.4037	FT4	0.00210099	24.966
rs12908520	G	A	0.061772	-0.005	0.0065	0.0130954	2.26482e-06	0.4435	11862	genus.Akkermansia.id.4037	FT4	0.0018723	22.2471
rs2602429	C	T	0.0745352	0.0003	0.0086	0.0156201	2.71569e-06	0.9712	11689	genus.Akkermansia.id.4037	FT4	0.00194416	22.7656
rs4242783	G	A	0.0685454	0.0039	0.0077	0.0147701	2.99799e-06	0.6111	11689	genus.Akkermansia.id.4037	FT4	0.00183914	21.5336
rs4936098	A	G	0.0649225	-0.0024	0.0072	0.0135934	1.10359e-06	0.7428	11857	genus.Akkermansia.id.4037	FT4	0.00192011	22.8067
rs61779207	G	A	-0.0760539	0.01	0.0084	0.0167769	6.32116e-06	0.2331	11590	genus.Akkermansia.id.4037	FT4	0.00176997	20.5468
rs74542928	T	C	0.112623	-0.0143	0.0117	0.0236434	1.4802e-06	0.2224	11215	genus.Akkermansia.id.4037	FT4	0.00201908	22.6858
rs9349825	A	G	-0.0703407	0.003	0.0074	0.0147133	2.59886e-06	0.6854	11857	genus.Akkermansia.id.4037	FT4	0.0019239	22.8518
rs941682	G	A	-0.0632957	-0.004	0.0072	0.0143777	9.17126e-06	0.5757	11808	genus.Akkermansia.id.4037	FT4	0.00163864	19.3775
rs11604400	C	T	-0.102524	0.0033	0.0102	0.0234834	9.74463e-06	0.7473	8107	genus.Adlercreutzia.id.812	FT4	0.00234559	19.0557
rs13231526	C	A	0.143237	-0.0127	0.0132	0.0311654	4.81355e-06	0.3383	8051	genus.Adlercreutzia.id.812	FT4	0.00261684	21.1182
rs2717140	C	T	-0.119225	0.0194	0.0105	0.0251081	2.04594e-06	0.06483	8243	genus.Adlercreutzia.id.812	FT4	0.00272795	22.5425
rs55719207	G	A	-0.0699243	-0.0059	0.0075	0.0158036	9.60505e-06	0.4301	8243	genus.Adlercreutzia.id.812	FT4	0.00236934	19.5721
rs6664405	T	C	-0.0953084	0.025	0.0104	0.0210752	5.23422e-06	0.01599	8051	genus.Adlercreutzia.id.812	FT4	0.00253378	20.4462
rs7680684	C	T	-0.083381	-0.0006	0.0073	0.0168901	9.76904e-07	0.9332	8243	genus.Adlercreutzia.id.812	FT4	0.00294783	24.3649
rs9490822	C	T	-0.0734512	-0.0071	0.0068	0.0155789	2.54421e-06	0.2952	8243	genus.Adlercreutzia.id.812	FT4	0.00268949	22.2238
rs9915817	T	C	0.0749219	0.0129	0.0072	0.016833	8.21673e-06	0.07379	8243	genus.Adlercreutzia.id.812	FT4	0.00239754	19.8056
rs2715439	C	T	0.0746684	-0.0151	0.0067	0.0164822	6.27e-06	0.02344	7468	genus.Actinomyces.id.423	FT4	0.00274061	20.5177
rs34583783	G	T	0.126596	0.0084	0.0104	0.0268461	4.48529e-06	0.4242	7468	genus.Actinomyces.id.423	FT4	0.00296881	22.2311
rs35011108	A	G	0.232634	-0.0299	0.0206	0.0512044	6.33832e-06	0.1456	3515	genus.Actinomyces.id.423	FT4	0.00583798	20.6293
rs4073240	G	A	0.0749687	0.0021	0.0068	0.0167368	7.94274e-06	0.7625	7468	genus.Actinomyces.id.423	FT4	0.00267944	20.0585
rs4146653	G	A	0.0985224	0.0127	0.0087	0.0214182	4.49647e-06	0.1458	7468	genus.Actinomyces.id.423	FT4	0.00282533	21.1537
rs71315246	A	G	-0.0969809	-0.0122	0.0087	0.021925	9.82978e-06	0.1599	7468	genus.Actinomyces.id.423	FT4	0.00261307	19.5603
rs7915461	T	C	0.18776	0.014	0.0132	0.0401636	5.91984e-06	0.2862	5282	genus.Actinomyces.id.423	FT4	0.00412048	21.8462
rs10904297	A	G	-0.167804	0.0103	0.0168	0.0389812	2.68713e-06	0.5416	3143	genus..Ruminococcustorquesgroup.id.14377	FT4	0.00586135	18.5191
rs10967781	C	A	0.0507994	0.0009	0.007	0.0113322	8.36865e-06	0.9018	17791	genus..Ruminococcustorquesgroup.id.14377	FT4	0.00112822	20.0927
rs12434631	A	G	0.074697	-0.0042	0.0109	0.0153401	2.77247e-06	0.702	17353	genus..Ruminococcustorquesgroup.id.14377	FT4	0.00136454	23.7084
rs1475330	T	C	0.0523492	-0.0029	0.0077	0.01182	8.13435e-06	0.709	17353	genus..Ruminococcustorquesgroup.id.14377	FT4	0.00112906	19.6125
rs35866622	T	C	-0.0612024	0.0037	0.0068	0.0109421	2.21337e-08	0.5916	17240	genus..Ruminococcustorquesgroup.id.14377	FT4	0.00181138	31.2812
rs4073731	T	C	0.0651948	0.0049	0.009	0.0142221	4.0525e-06	0.5843	17793	genus..Ruminococcustorquesgroup.id.14377	FT4	0.0011796	21.0111
rs77034621	T	G	-0.151553	0.0002	0.0144	0.0335878	6.06872e-06	0.9862	8567	genus..Ruminococcustorquesgroup.id.14377	FT4	0.00237086	20.3547
rs8080469	G	A	0.0490727	0.0129	0.0067	0.0107036	3.49522e-06	0.05372	17798	genus..Ruminococcustorquesgroup.id.14377	FT4	0.0011796	21.0169
rs8141465	A	G	0.0480778	0.0012	0.0065	0.0107442	9.64837e-06	0.8541	17791	genus..Ruminococcustorquesgroup.id.14377	FT4	0.00112422	20.0212
rs11597105	A	G	0.114673	-0.0022	0.0095	0.0250653	6.94868e-06	0.8179	6328	genus..Ruminococcusgnavusgroup.id.14376	FT4	0.00329667	20.9237
rs11864644	T	C	-0.139804	-0.019	0.014	0.0318253	5.0088e-06	0.1755	6241	genus..Ruminococcusgnavusgroup.id.14376	FT4	0.00308245	19.2909
rs12136548	C	T	0.0901946	-0.0045	0.0071	0.0196476	3.09631e-06	0.5314	6401	genus..Ruminococcusgnavusgroup.id.14376	FT4	0.00328146	21.0672
rs12989336	G	A	-0.0846861	0.0029	0.0073	0.0187936	7.11808e-06	0.6924	6401	genus..Ruminococcusgnavusgroup.id.14376	FT4	0.00316213	20.2987
rs13163520	G	A	-0.127377	-0.0007	0.0089	0.0233883	5.61015e-08	0.9394	6326	genus..Ruminococcusgnavusgroup.id.14376	FT4	0.00466688	29.6517
rs2909242	C	A	-0.0909965	0.0208	0.007	0.018351	7.40957e-07	0.00307	6401	genus..Ruminococcusgnavusgroup.id.14376	FT4	0.00382663	24.5807
rs3124783	A	G	-0.11599	0.0138	0.0094	0.0249099	2.6652e-06	0.1396	6401	genus..Ruminococcusgnavusgroup.id.14376	FT4	0.00337581	21.675
rs4388134	C	T	-0.0904997	0.0048	0.0081	0.0203544	9.11637e-06	0.5534	6399	genus..Ruminococcusgnavusgroup.id.14376	FT4	0.00307982	19.7625
rs62167033	T	C	0.185289	-0.0206	0.0155	0.0396295	3.49529e-06	0.182	5194	genus..Ruminococcusgnavusgroup.id.14376	FT4	0.00419117	21.8522
rs78399089	T	C	0.144445	-0.0129	0.0116	0.0326618	6.62998e-06	0.2646	5944	genus..Ruminococcusgnavusgroup.id.14376	FT4	0.00327959	19.5514
rs934940	A	C	-0.105045	-0.0074	0.0091	0.0229588	2.73705e-06	0.4195	6309	genus..Ruminococcusgnavusgroup.id.14376	FT4	0.00330713	20.9273
rs9872758	T	C	0.0849233	0.0019	0.0068	0.0176643	1.66029e-06	0.7859	6398	genus..Ruminococcusgnavusgroup.id.14376	FT4	0.00359956	23.106
rs10931481	G	A	0.0610096	-0.0059	0.0073	0.0130484	3.38211e-06	0.4189	13382	genus..Ruminococcusgauvreauiigroup.id.11342	FT4	0.00163098	21.8582
rs12079579	A	G	0.0955324	0.0035	0.0119	0.0213436	5.03725e-06	0.7688	12986	genus..Ruminococcusgauvreauiigroup.id.11342	FT4	0.00154035	20.0308
rs1391597	C	T	0.0590284	-0.0113	0.0067	0.0124874	1.85964e-06	0.09287	13382	genus..Ruminococcusgauvreauiigroup.id.11342	FT4	0.001667	22.3417
rs2047242	A	G	-0.067603	0.0073	0.0073	0.0133738	2.46372e-07	0.3201	13369	genus..Ruminococcusgauvreauiigroup.id.11342	FT4	0.00190764	25.5481
rs2105937	A	G	0.0580215	0.0017	0.007	0.0127806	5.10352e-06	0.8123	13364	genus..Ruminococcusgauvreauiigroup.id.11342	FT4	0.00153982	20.6069
rs2166943	A	C	0.0566974	-0.0085	0.0066	0.0123497	5.27717e-06	0.1956	13377	genus..Ruminococcusgauvreauiigroup.id.11342	FT4	0.00157316	21.0742
rs289410	G	A	-0.0654926	0.0114	0.0074	0.0139101	2.27464e-06	0.1226	13380	genus..Ruminococcusgauvreauiigroup.id.11342	FT4	0.00165405	22.1645
rs431418	A	G	-0.094737	0.0068	0.0109	0.0210157	5.53667e-06	0.5324	13289	genus..Ruminococcusgauvreauiigroup.id.11342	FT4	0.00152685	20.3182
rs71386687	T	G	0.121037	-0.0155	0.016	0.02386	2.90761e-07	0.3323	11340	genus..Ruminococcusgauvreauiigroup.id.11342	FT4	0.00226412	25.7288
rs73802842	C	A	0.0736808	-0.0052	0.0093	0.0169665	7.48026e-06	0.576	13382	genus..Ruminococcusgauvreauiigroup.id.11342	FT4	0.00140732	18.8565
rs9870933	A	G	0.0621643	0.0024	0.0068	0.0126072	8.4912e-07	0.7255	13382	genus..Ruminococcusgauvreauiigroup.id.11342	FT4	0.00181358	24.3098
rs10140184	A	C	0.0576795	-0.0019	0.0074	0.012599	4.95862e-06	0.8011	12930	genus..Eubacteriumxylanophilumgroup.id.14375	FT4	0.00161834	20.9558
rs10917203	A	C	0.0612633	0.0011	0.0073	0.0130917	3.15155e-06	0.8757	12930	genus..Eubacteriumxylanophilumgroup.id.14375	FT4	0.00169074	21.8949
rs112176119	C	T	-0.113455	0.0192	0.0171	0.0245762	3.32766e-06	0.2633	12199	genus..Eubacteriumxylanophilumgroup.id.14375	FT4	0.00174397	21.3084
rs13239072	G	A	0.0687427	0.0029	0.0075	0.0142728	1.81783e-06	0.704	13307	genus..Eubacteriumxylanophilumgroup.id.14375	FT4	0.00174019	23.1936
rs17830032	G	A	-0.160597	-0.0156	0.0171	0.0310515	2.38893e-07	0.3609	9527	genus..Eubacteriumxylanophilumgroup.id.14375	FT4	0.00279988	26.7437
rs1999224	G	T	-0.0949051	-0.0028	0.0112	0.0203503	3.75492e-06	0.8037	13309	genus..Eubacteriumxylanophilumgroup.id.14375	FT4	0.00163149	21.7457
rs2012708	A	G	0.0573202	-0.0068	0.0068	0.0126905	6.5254e-06	0.3199	13306	genus..Eubacteriumxylanophilumgroup.id.14375	FT4	0.0015309	20.3983
rs2213117	T	G	0.0877797	-0.0103	0.0109	0.0189012	4.21329e-06	0.3475	12878	genus..Eubacteriumxylanophilumgroup.id.14375	FT4	0.00167199	21.5646
rs75586835	A	G	-0.114498	0.0112	0.0137	0.0263455	9.38708e-06	0.4146	12550	genus..Eubacteriumxylanophilumgroup.id.14375	FT4	0.00150274	18.8847
rs11617697	A	G	-0.143349	-0.0054	0.0182	0.0286241	7.21757e-07	0.7683	11497	genus..Eubacteriumventriosumgroup.id.11341	FT4	0.00217667	25.0754
rs12964517	G	A	0.0587198	-0.0075	0.007	0.0123453	2.07499e-06	0.282	15289	genus..Eubacteriumventriosumgroup.id.11341	FT4	0.00147755	22.6207
rs13082419	C	T	-0.0715522	0.0098	0.009	0.016137	9.55987e-06	0.2726	14501	genus..Eubacteriumventriosumgroup.id.11341	FT4	0.00135399	19.6581
rs16884680	G	T	-0.0906428	-0.0009	0.0114	0.0191909	1.73969e-06	0.938	15289	genus..Eubacteriumventriosumgroup.id.11341	FT4	0.00145701	22.3059
rs35179274	C	T	-0.0627263	0.0091	0.0076	0.013786	5.75792e-06	0.2339	15287	genus..Eubacteriumventriosumgroup.id.11341	FT4	0.00135243	20.6999
rs3809430	T	C	-0.0548171	-0.0115	0.0067	0.0118426	3.55317e-06	0.086	15287	genus..Eubacteriumventriosumgroup.id.11341	FT4	0.00139962	21.4232
rs66746423	C	T	0.0751501	0.0018	0.009	0.0164978	6.11142e-06	0.8375	14578	genus..Eubacteriumventriosumgroup.id.11341	FT4	0.00142131	20.7465
rs6704822	A	G	0.0739179	-0.0067	0.0101	0.0166705	6.6223e-06	0.5102	15289	genus..Eubacteriumventriosumgroup.id.11341	FT4	0.0012843	19.6583
rs72783037	C	A	0.0658926	-0.005	0.0082	0.0143747	6.54762e-06	0.5411	15286	genus..Eubacteriumventriosumgroup.id.11341	FT4	0.00137273	21.0097
rs73615400	T	C	-0.0956303	0.0109	0.0116	0.0193428	9.53613e-07	0.3482	15146	genus..Eubacteriumventriosumgroup.id.11341	FT4	0.00161122	24.4398
rs73849225	T	C	0.0975711	0.0211	0.0133	0.0224388	5.20909e-06	0.1138	14573	genus..Eubacteriumventriosumgroup.id.11341	FT4	0.00129578	18.9053
rs78250280	G	A	0.0749762	-0.0089	0.0115	0.0164404	3.35791e-06	0.4408	14835	genus..Eubacteriumventriosumgroup.id.11341	FT4	0.00139999	20.7951
rs876734	C	T	-0.0618696	-0.0029	0.0077	0.0132532	2.88908e-06	0.708	14913	genus..Eubacteriumventriosumgroup.id.11341	FT4	0.00145919	21.7898
rs9316536	T	G	-0.0817111	-0.0015	0.0146	0.0183121	7.83519e-06	0.9198	15289	genus..Eubacteriumventriosumgroup.id.11341	FT4	0.00130059	19.9081
rs10131724	A	C	-0.199832	0.0062	0.0173	0.0414577	2.38663e-06	0.7177	5071	genus..Eubacteriumruminantiumgroup.id.11340	FT4	0.00456081	23.2247
rs10923018	G	A	0.0726438	-0.0011	0.0066	0.0160924	6.79541e-06	0.8688	7739	genus..Eubacteriumruminantiumgroup.id.11340	FT4	0.0026262	20.3724
rs11637981	G	T	-0.073258	-0.0067	0.0065	0.0160888	5.43671e-06	0.3044	7718	genus..Eubacteriumruminantiumgroup.id.11340	FT4	0.00267913	20.7277
rs13025464	T	C	-0.0737077	-0.0014	0.0069	0.0163786	6.96842e-06	0.8356	7738	genus..Eubacteriumruminantiumgroup.id.11340	FT4	0.00261042	20.247
rs139749	C	T	-0.0845439	-0.0022	0.0071	0.0171791	8.58845e-07	0.7566	7314	genus..Eubacteriumruminantiumgroup.id.11340	FT4	0.00330046	24.2129
rs16891896	G	A	-0.174787	0.0012	0.015	0.0390573	2.3812e-06	0.9357	4753	genus..Eubacteriumruminantiumgroup.id.11340	FT4	0.00419586	20.0185
rs17519472	C	T	0.107804	-0.0005	0.0092	0.0233984	4.70356e-06	0.9564	7710	genus..Eubacteriumruminantiumgroup.id.11340	FT4	0.00274569	21.222
rs209813	G	A	-0.103488	0.0105	0.0096	0.0236391	9.23146e-06	0.2696	7264	genus..Eubacteriumruminantiumgroup.id.11340	FT4	0.00263148	19.1602
rs2116427	A	G	0.0911461	0.0029	0.0079	0.0182353	4.67364e-07	0.7142	7739	genus..Eubacteriumruminantiumgroup.id.11340	FT4	0.00321784	24.9768
rs2229917	A	G	0.153538	0.0036	0.0133	0.0323922	2.15894e-06	0.7879	7050	genus..Eubacteriumruminantiumgroup.id.11340	FT4	0.00317672	22.4609
rs2418654	C	T	-0.0748879	0.0112	0.0079	0.0165852	6.17247e-06	0.1585	7314	genus..Eubacteriumruminantiumgroup.id.11340	FT4	0.00277984	20.3829
rs2817174	C	T	-0.0734306	-0.0044	0.007	0.0163687	7.8696e-06	0.5317	7710	genus..Eubacteriumruminantiumgroup.id.11340	FT4	0.00260339	20.1193
rs57340348	T	C	-0.0979429	0.0067	0.0087	0.0212166	4.93278e-06	0.4387	7314	genus..Eubacteriumruminantiumgroup.id.11340	FT4	0.0029052	21.3047
rs606117	A	G	0.0833243	-0.0037	0.007	0.018056	4.81639e-06	0.5922	7263	genus..Eubacteriumruminantiumgroup.id.11340	FT4	0.00292357	21.2903
rs6676699	G	T	-0.0888124	0.008	0.0081	0.0196447	6.37979e-06	0.3232	7708	genus..Eubacteriumruminantiumgroup.id.11340	FT4	0.00264462	20.4335
rs7000472	A	G	-0.0762282	0.0024	0.0068	0.016523	4.06848e-06	0.7227	7739	genus..Eubacteriumruminantiumgroup.id.11340	FT4	0.00274268	21.2785
rs72836424	C	T	-0.139825	-0.0067	0.0124	0.030069	2.62125e-06	0.591	7314	genus..Eubacteriumruminantiumgroup.id.11340	FT4	0.00294777	21.6178
rs73139629	A	C	-0.115098	-0.008	0.0106	0.0247909	5.36199e-06	0.4498	7314	genus..Eubacteriumruminantiumgroup.id.11340	FT4	0.00293843	21.5491
rs10248854	C	A	-0.0527827	-0.007	0.0068	0.0113464	4.20676e-06	0.3057	17348	genus..Eubacteriumrectalegroup.id.14374	FT4	0.00124589	21.6382
rs10797540	A	G	0.0503179	-0.0005	0.0066	0.0108389	3.53384e-06	0.944	17350	genus..Eubacteriumrectalegroup.id.14374	FT4	0.0012406	21.5487
rs143694765	T	C	0.0870025	-0.0012	0.013	0.019779	9.75369e-06	0.9272	15124	genus..Eubacteriumrectalegroup.id.14374	FT4	0.00127772	19.3464
rs2884897	A	G	-0.129364	0.0132	0.0154	0.0289021	6.44426e-06	0.3935	10813	genus..Eubacteriumrectalegroup.id.14374	FT4	0.00184934	20.0303
rs314726	T	C	0.0528824	0.0085	0.0073	0.0109486	1.37967e-06	0.2442	16966	genus..Eubacteriumrectalegroup.id.14374	FT4	0.00137318	23.3266
rs35398954	A	G	-0.0901402	-0.0023	0.0105	0.0174602	5.39945e-07	0.8298	16621	genus..Eubacteriumrectalegroup.id.14374	FT4	0.00160098	26.6494
rs59427698	A	G	-0.0576035	0.0021	0.0078	0.0130853	5.36906e-06	0.7853	16613	genus..Eubacteriumrectalegroup.id.14374	FT4	0.00116513	19.3765
rs62547233	A	G	0.0536319	0.0004	0.0073	0.0120201	9.8982e-06	0.9512	17347	genus..Eubacteriumrectalegroup.id.14374	FT4	0.00114633	19.9059
rs12129908	C	A	0.0893273	-0.0053	0.0066	0.0198333	5.79516e-06	0.4265	5377	genus..Eubacteriumoxidoreducensgroup.id.11339	FT4	0.0037584	20.2776
rs12423772	G	T	0.14098	0.0063	0.015	0.0295029	2.62925e-06	0.677	5321	genus..Eubacteriumoxidoreducensgroup.id.11339	FT4	0.00427298	22.8255
rs2973294	G	T	0.0923559	0.0015	0.0066	0.0195439	2.38836e-06	0.8186	5378	genus..Eubacteriumoxidoreducensgroup.id.11339	FT4	0.00413511	22.3227
rs34561138	G	A	0.216145	0.0061	0.0142	0.045992	2.51163e-06	0.6654	4186	genus..Eubacteriumoxidoreducensgroup.id.11339	FT4	0.0052486	22.076
rs10263623	C	T	0.193496	-0.012	0.0116	0.0439023	8.90706e-06	0.2992	3080	genus..Eubacteriumnodatumgroup.id.11297	FT4	0.0062674	19.4127
rs10458299	T	C	-0.187753	-0.0002	0.0115	0.041969	8.36714e-06	0.9886	3271	genus..Eubacteriumnodatumgroup.id.11297	FT4	0.00608115	20.0009
rs11006576	A	G	-0.110167	0.0008	0.0065	0.024593	7.98664e-06	0.897	3295	genus..Eubacteriumnodatumgroup.id.11297	FT4	0.00605327	20.0548
rs113893692	C	T	-0.185107	0.0069	0.0116	0.0403573	5.75702e-06	0.5539	3195	genus..Eubacteriumnodatumgroup.id.11297	FT4	0.00654155	21.0247
rs34297067	A	G	-0.186907	-0.0025	0.009	0.0341475	6.59784e-08	0.7816	3271	genus..Eubacteriumnodatumgroup.id.11297	FT4	0.00907593	29.941
rs61841040	G	T	0.160621	0.0002	0.0094	0.0341609	3.56141e-06	0.9843	3295	genus..Eubacteriumnodatumgroup.id.11297	FT4	0.00666479	22.0944
rs6818880	A	G	-0.110081	0.0097	0.0069	0.0245964	7.8254e-06	0.1637	3291	genus..Eubacteriumnodatumgroup.id.11297	FT4	0.00604942	20.0176
rs77910827	C	T	0.201788	0.0284	0.0114	0.0413568	9.05381e-07	0.01288	3271	genus..Eubacteriumnodatumgroup.id.11297	FT4	0.00722551	23.7921
rs7827125	C	T	0.1223	-0.0024	0.0074	0.0271331	7.17355e-06	0.7455	3294	genus..Eubacteriumnodatumgroup.id.11297	FT4	0.00612996	20.3043
rs7880204	T	C	-0.125454	0.0073	0.008	0.0275303	6.83884e-06	0.3641	3294	genus..Eubacteriumnodatumgroup.id.11297	FT4	0.00626459	20.753
rs9425984	T	C	-0.130234	-0.0124	0.0077	0.0292347	7.20681e-06	0.109	3294	genus..Eubacteriumnodatumgroup.id.11297	FT4	0.00598852	19.833
rs10501370	C	T	-0.115589	-0.0273	0.0147	0.0252489	5.41918e-06	0.06419	13824	genus..Eubacteriumhalliigroup.id.11338	FT4	0.00151376	20.9549
rs10798999	C	T	0.0601661	0.0041	0.008	0.0126752	2.60558e-06	0.6046	16561	genus..Eubacteriumhalliigroup.id.11338	FT4	0.00135867	22.5288
rs10808115	A	C	-0.0504747	-0.0053	0.0067	0.0109922	4.42448e-06	0.4278	16566	genus..Eubacteriumhalliigroup.id.11338	FT4	0.00127117	21.0825
rs117748144	T	C	-0.126582	-0.0062	0.0151	0.028712	7.86002e-06	0.6831	10861	genus..Eubacteriumhalliigroup.id.11338	FT4	0.00178637	19.4329
rs13116360	T	C	0.154124	-0.0063	0.0168	0.0297185	2.94487e-07	0.7081	10323	genus..Eubacteriumhalliigroup.id.11338	FT4	0.00259868	26.8908
rs17074066	T	C	-0.0813986	-0.0035	0.013	0.0189272	9.34905e-06	0.7858	15804	genus..Eubacteriumhalliigroup.id.11338	FT4	0.00116892	18.4929
rs17474256	G	A	0.0810805	0.0011	0.0109	0.0184573	9.45445e-06	0.9195	16460	genus..Eubacteriumhalliigroup.id.11338	FT4	0.001171	19.2949
rs281379	A	G	-0.0499523	-0.0007	0.0067	0.0112153	9.32796e-06	0.9169	16130	genus..Eubacteriumhalliigroup.id.11338	FT4	0.00122835	19.8352
rs28584818	A	G	0.126115	0.016	0.014	0.0268627	4.43235e-06	0.2524	11095	genus..Eubacteriumhalliigroup.id.11338	FT4	0.00198265	22.0372
rs60254196	A	G	-0.0522832	-0.0121	0.0074	0.0111865	2.69672e-06	0.1025	16238	genus..Eubacteriumhalliigroup.id.11338	FT4	0.00134344	21.8415
rs630939	C	T	-0.0508914	0.0004	0.0074	0.0114352	9.15759e-06	0.959	16238	genus..Eubacteriumhalliigroup.id.11338	FT4	0.00121826	19.8037
rs74018587	C	T	0.208943	-0.0542	0.021	0.043822	3.70257e-06	0.009707	3039	genus..Eubacteriumhalliigroup.id.11338	FT4	0.00742512	22.7188
rs78056098	G	T	-0.0507411	0.007	0.0067	0.0113758	8.28818e-06	0.3024	16568	genus..Eubacteriumhalliigroup.id.11338	FT4	0.0011994	19.8931
rs949971	T	G	-0.0540164	0.0038	0.0068	0.0116101	3.29002e-06	0.5705	16566	genus..Eubacteriumhalliigroup.id.11338	FT4	0.00130496	21.6436
rs10147907	T	G	0.172263	-0.0082	0.0124	0.039601	8.27246e-06	0.5081	3833	genus..Eubacteriumfissicatenagroup.id.14373	FT4	0.0049124	18.9123
rs11818408	G	A	0.10585	0.0102	0.0068	0.0237114	8.20015e-06	0.134	3590	genus..Eubacteriumfissicatenagroup.id.14373	FT4	0.00552041	19.9172
rs11876297	T	C	0.131469	-0.0053	0.0096	0.0281712	2.66556e-06	0.5845	3396	genus..Eubacteriumfissicatenagroup.id.14373	FT4	0.00637228	21.7662
rs151257695	A	G	0.20951	0.0244	0.015	0.0454847	3.09681e-06	0.1035	3587	genus..Eubacteriumfissicatenagroup.id.14373	FT4	0.0058801	21.2049
rs1768152	T	C	0.139489	0.0147	0.0092	0.0316186	8.70054e-06	0.1112	3590	genus..Eubacteriumfissicatenagroup.id.14373	FT4	0.005392	19.4514
rs2733072	G	A	0.109644	-0.0109	0.0069	0.0228306	1.49089e-06	0.1121	3833	genus..Eubacteriumfissicatenagroup.id.14373	FT4	0.00598126	23.0521
rs3771393	C	T	0.130842	0.0054	0.0076	0.0266671	7.37909e-07	0.4729	3792	genus..Eubacteriumfissicatenagroup.id.14373	FT4	0.00630853	24.0611
rs6934739	A	G	0.111463	-0.0049	0.0073	0.0252788	9.75326e-06	0.4969	3831	genus..Eubacteriumfissicatenagroup.id.14373	FT4	0.00504941	19.4323
rs7104872	G	A	0.138612	0.0042	0.0084	0.0291906	2.7315e-06	0.6178	3829	genus..Eubacteriumfissicatenagroup.id.14373	FT4	0.00585437	22.5366
rs12719051	A	G	0.0916626	-0.0065	0.0129	0.0208183	7.11766e-06	0.6116	12799	genus..Eubacteriumeligensgroup.id.14372	FT4	0.00151237	19.3831
rs182318	G	A	-0.0824941	-0.0227	0.0119	0.0195615	8.39837e-06	0.05659	14777	genus..Eubacteriumeligensgroup.id.14372	FT4	0.00120208	17.7821
rs2200429	A	G	-0.0888825	0.0056	0.0125	0.0198479	5.29721e-06	0.6523	14761	genus..Eubacteriumeligensgroup.id.14372	FT4	0.00135674	20.0514
rs265534	T	G	-0.0563756	0.0082	0.0065	0.0120127	2.26758e-06	0.213	14776	genus..Eubacteriumeligensgroup.id.14372	FT4	0.00148832	22.0212
rs4583233	A	C	0.0670205	0.0024	0.0084	0.0128122	2.83852e-07	0.7755	14327	genus..Eubacteriumeligensgroup.id.14372	FT4	0.00190627	27.3595
rs56080211	C	T	0.123093	-0.007	0.0192	0.0282743	9.1429e-06	0.7143	10699	genus..Eubacteriumeligensgroup.id.14372	FT4	0.00176835	18.9496
rs6923695	T	G	0.103268	0.0136	0.0124	0.0229525	4.87406e-06	0.2735	12891	genus..Eubacteriumeligensgroup.id.14372	FT4	0.00156784	20.2396
rs1020520	T	G	-0.0590705	-0.004	0.0081	0.0132929	8.88975e-06	0.6249	17371	genus..Eubacteriumcoprostanoligenesgroup.id.11375	FT4	0.00113549	19.7448
rs10444197	A	G	-0.0505823	0.0004	0.007	0.0113455	5.98464e-06	0.9515	17380	genus..Eubacteriumcoprostanoligenesgroup.id.11375	FT4	0.00114236	19.8746
rs11052069	T	C	0.0477832	0.0017	0.0069	0.0107833	9.37949e-06	0.8049	17380	genus..Eubacteriumcoprostanoligenesgroup.id.11375	FT4	0.00112851	19.6333
rs11720857	C	T	0.0630776	0.0052	0.0089	0.0144485	9.26255e-06	0.5543	16960	genus..Eubacteriumcoprostanoligenesgroup.id.11375	FT4	0.00112251	19.057
rs12906958	C	T	-0.0533159	0.0121	0.0069	0.0115935	4.34803e-06	0.08069	17380	genus..Eubacteriumcoprostanoligenesgroup.id.11375	FT4	0.00121537	21.1464
rs17159861	C	T	0.0962228	-0.0012	0.0106	0.0168388	1.03787e-08	0.9131	17380	genus..Eubacteriumcoprostanoligenesgroup.id.11375	FT4	0.00187528	32.6499
rs2644213	G	A	0.0538845	-0.0013	0.0077	0.0121245	9.85638e-06	0.8621	17380	genus..Eubacteriumcoprostanoligenesgroup.id.11375	FT4	0.00113517	19.7494
rs4076415	T	G	0.0515152	-0.0026	0.0072	0.0110294	1.98974e-06	0.7198	16960	genus..Eubacteriumcoprostanoligenesgroup.id.11375	FT4	0.00128464	21.8129
rs62024432	C	T	-0.0769698	0.025	0.0104	0.0172101	7.50207e-06	0.01594	17271	genus..Eubacteriumcoprostanoligenesgroup.id.11375	FT4	0.00115678	19.9996
rs6762473	C	A	0.0521584	0.0019	0.0068	0.0112353	4.26113e-06	0.778	17377	genus..Eubacteriumcoprostanoligenesgroup.id.11375	FT4	0.00123871	21.5493
rs76898927	G	A	0.123055	-0.0114	0.0157	0.0266375	4.78979e-06	0.4682	12197	genus..Eubacteriumcoprostanoligenesgroup.id.11375	FT4	0.00174663	21.3374
rs79895140	T	C	-0.0641017	-0.014	0.0099	0.0141153	8.61816e-06	0.1543	16139	genus..Eubacteriumcoprostanoligenesgroup.id.11375	FT4	0.00127623	20.6208
rs9648214	T	C	-0.0828719	0.0198	0.01	0.016431	2.5203e-07	0.04739	17379	genus..Eubacteriumcoprostanoligenesgroup.id.11375	FT4	0.0014616	25.4354
rs112617308	T	C	-0.170873	-0.0019	0.011	0.0362844	2.38033e-06	0.8637	4001	genus..Eubacteriumbrachygroup.id.11296	FT4	0.00551239	22.1662
rs12151423	A	G	0.101329	0.0038	0.0072	0.0227324	9.2705e-06	0.5926	3854	genus..Eubacteriumbrachygroup.id.11296	FT4	0.00512893	19.8585
rs13139592	T	C	-0.145997	0.0151	0.0113	0.0327192	7.96753e-06	0.182	3842	genus..Eubacteriumbrachygroup.id.11296	FT4	0.00515558	19.9
rs1384962	A	G	0.120888	-0.0129	0.0076	0.0266264	6.99292e-06	0.09205	4001	genus..Eubacteriumbrachygroup.id.11296	FT4	0.00512557	20.6028
rs2913110	C	T	0.105143	0.0148	0.0066	0.022942	4.55806e-06	0.02639	4001	genus..Eubacteriumbrachygroup.id.11296	FT4	0.00522224	20.9934
rs4862235	G	A	0.104806	-0.0072	0.007	0.0225751	3.73143e-06	0.3026	4000	genus..Eubacteriumbrachygroup.id.11296	FT4	0.00535945	21.5425
rs62348779	T	C	-0.201481	-0.0009	0.0137	0.043286	3.78122e-06	0.9448	3827	genus..Eubacteriumbrachygroup.id.11296	FT4	0.00562938	21.6543
rs6591893	G	A	0.108225	-0.0055	0.0071	0.0240319	7.34344e-06	0.4347	3999	genus..Eubacteriumbrachygroup.id.11296	FT4	0.00504586	20.2706
rs720439	A	G	-0.111927	-0.0018	0.0076	0.0251252	7.02827e-06	0.8151	4001	genus..Eubacteriumbrachygroup.id.11296	FT4	0.00493551	19.835
rs10074000	T	C	-0.102648	-0.0018	0.0069	0.0227508	6.99943e-06	0.7992	4048	genus..Clostridiuminnocuumgroup.id.14397	FT4	0.00500366	20.3466
rs10506058	A	G	0.0997048	-0.0055	0.0066	0.0221926	8.92443e-06	0.4062	4163	genus..Clostridiuminnocuumgroup.id.14397	FT4	0.00482514	20.1747
rs1942371	G	A	-0.157938	0.0063	0.0106	0.034187	4.06337e-06	0.5531	3971	genus..Clostridiuminnocuumgroup.id.14397	FT4	0.00534594	21.3321
rs40656	C	T	0.142664	-0.0072	0.0118	0.0311021	8.6152e-06	0.5388	4048	genus..Clostridiuminnocuumgroup.id.14397	FT4	0.00517082	21.0299
rs4869133	G	A	-0.180591	-0.0003	0.0127	0.0409505	7.24455e-06	0.9799	3735	genus..Clostridiuminnocuumgroup.id.14397	FT4	0.00517994	19.4374
rs61267978	T	C	0.14708	-0.0042	0.0093	0.0320875	5.58513e-06	0.6547	4165	genus..Clostridiuminnocuumgroup.id.14397	FT4	0.00501918	21.0002
rs6577484	G	A	0.160425	0.0057	0.0119	0.0360857	8.40602e-06	0.6323	3858	genus..Clostridiuminnocuumgroup.id.14397	FT4	0.00509671	19.7536
rs6890185	T	C	0.113424	0.0004	0.0069	0.0233137	1.12244e-06	0.9517	4166	genus..Clostridiuminnocuumgroup.id.14397	FT4	0.00564942	23.6579
rs77845139	A	G	-0.114993	-0.0151	0.0077	0.0257186	8.40622e-06	0.05134	4048	genus..Clostridiuminnocuumgroup.id.14397	FT4	0.00491436	19.9817
rs11764871	G	T	0.127099	0.0068	0.0073	0.025656	7.49289e-07	0.3531	3909	family.Victivallaceae.id.2255	FT4	0.00623912	24.5293
rs2944282	T	C	-0.124197	-0.0066	0.0077	0.0257026	1.56601e-06	0.3864	3555	family.Victivallaceae.id.2255	FT4	0.00652505	23.3358
rs34962571	A	C	-0.186945	-0.014	0.0119	0.0418412	6.24824e-06	0.2388	3237	family.Victivallaceae.id.2255	FT4	0.00612928	19.9505
rs4396289	C	T	-0.152918	0.0049	0.0087	0.0288525	1.53782e-07	0.5681	3913	family.Victivallaceae.id.2255	FT4	0.00712739	28.0753
rs61702987	T	C	0.145501	-0.007	0.0096	0.0300007	3.07921e-06	0.4678	3906	family.Victivallaceae.id.2255	FT4	0.00598591	23.5097
rs62570196	C	T	-0.246101	0.0009	0.0134	0.0483077	2.69852e-07	0.944	3091	family.Victivallaceae.id.2255	FT4	0.00832655	25.9367
rs6545794	A	G	-0.197786	0.0095	0.0131	0.0410495	5.97005e-07	0.4681	3916	family.Victivallaceae.id.2255	FT4	0.00589336	23.2034
rs67832247	C	T	-0.123489	0.0039	0.0105	0.0266695	3.23801e-06	0.7083	3555	family.Victivallaceae.id.2255	FT4	0.00599482	21.4281
rs7077363	G	A	0.148942	0.0073	0.0092	0.0318366	2.83376e-06	0.4324	3912	family.Victivallaceae.id.2255	FT4	0.00556365	21.8756
rs7314815	G	A	0.101088	0.0073	0.0067	0.0225594	6.40086e-06	0.2742	3912	family.Victivallaceae.id.2255	FT4	0.00510649	20.0688
rs7627405	C	T	-0.134158	-0.0054	0.0108	0.0301427	8.1942e-06	0.6194	3555	family.Victivallaceae.id.2255	FT4	0.00554134	19.7981
rs117107102	A	G	0.204683	0.0151	0.0177	0.0431573	2.91821e-06	0.3944	4975	family.Verrucomicrobiaceae.id.4036	FT4	0.00450094	22.4844
rs11729256	T	C	0.0749798	-0.0159	0.0078	0.0150177	6.7309e-07	0.04195	11861	family.Verrucomicrobiaceae.id.4036	FT4	0.00209725	24.9235
rs12908520	G	A	0.0619104	-0.005	0.0065	0.0130946	2.15138e-06	0.4435	11863	family.Verrucomicrobiaceae.id.4036	FT4	0.00188075	22.3496
rs2602429	C	T	0.0745516	0.0003	0.0086	0.0156195	2.69939e-06	0.9712	11690	family.Verrucomicrobiaceae.id.4036	FT4	0.001945	22.7775
rs4242783	G	A	0.0687992	0.0039	0.0077	0.0147694	2.75444e-06	0.6111	11690	family.Verrucomicrobiaceae.id.4036	FT4	0.00185278	21.6955
rs4936098	A	G	0.0648691	-0.0024	0.0072	0.0135928	1.12929e-06	0.7428	11858	family.Verrucomicrobiaceae.id.4036	FT4	0.00191696	22.7711
rs61779207	G	A	-0.0758811	0.01	0.0084	0.0167762	6.63029e-06	0.2331	11591	family.Verrucomicrobiaceae.id.4036	FT4	0.00176195	20.4553
rs74542928	T	C	0.112124	-0.0143	0.0117	0.0236422	1.64613e-06	0.2224	11216	family.Verrucomicrobiaceae.id.4036	FT4	0.00200131	22.4877
rs9349825	A	G	-0.0704354	0.003	0.0074	0.0147128	2.51287e-06	0.6854	11858	family.Verrucomicrobiaceae.id.4036	FT4	0.00192904	22.9149
rs941682	G	A	-0.0631526	-0.004	0.0072	0.0143767	9.58114e-06	0.5757	11809	family.Verrucomicrobiaceae.id.4036	FT4	0.00163132	19.2925
rs111810795	C	T	-0.0867108	0.0001	0.0122	0.0180573	1.72927e-06	0.9913	15605	family.Veillonellaceae.id.2172	FT4	0.00147548	23.056
rs114889439	A	G	-0.253809	0.0175	0.0171	0.0539169	6.19028e-06	0.3064	3268	family.Veillonellaceae.id.2172	FT4	0.00673516	22.1462
rs11700976	C	A	0.0503337	0.0041	0.0066	0.0113763	9.25376e-06	0.5345	15971	family.Veillonellaceae.id.2172	FT4	0.00122419	19.5731
rs12186441	G	A	0.208096	0.0121	0.0165	0.0453999	4.52857e-06	0.463	5236	family.Veillonellaceae.id.2172	FT4	0.00399649	21.0015
rs12668619	A	G	0.055301	-0.0127	0.0068	0.0117654	2.57364e-06	0.06267	15971	family.Veillonellaceae.id.2172	FT4	0.00138141	22.0902
rs12741784	C	T	-0.0621452	-0.0041	0.0067	0.0119266	1.28494e-07	0.5459	15867	family.Veillonellaceae.id.2172	FT4	0.00170822	27.1473
rs1442060	G	A	-0.0514024	-0.0018	0.007	0.0112125	4.50675e-06	0.7939	15976	family.Veillonellaceae.id.2172	FT4	0.00131379	21.0141
rs1693340	T	C	0.0818934	0.0057	0.0105	0.018245	9.25271e-06	0.5884	15058	family.Veillonellaceae.id.2172	FT4	0.00133617	20.1443
rs2175069	A	G	-0.0526752	0.0079	0.0068	0.0114886	4.63558e-06	0.2449	15976	family.Veillonellaceae.id.2172	FT4	0.00131412	21.0194
rs2561116	T	G	-0.083617	0.0075	0.0108	0.0187159	7.88518e-06	0.4883	15976	family.Veillonellaceae.id.2172	FT4	0.00124783	19.9578
rs2585520	G	T	-0.0904972	-0.0067	0.0119	0.0200428	5.26922e-06	0.572	15501	family.Veillonellaceae.id.2172	FT4	0.00131348	20.3844
rs4263802	G	A	0.050942	-0.0049	0.0066	0.0114921	7.45003e-06	0.4593	15976	family.Veillonellaceae.id.2172	FT4	0.00122843	19.647
rs4461038	A	G	-0.0554965	-0.011	0.0068	0.0119467	3.73474e-06	0.1025	15973	family.Veillonellaceae.id.2172	FT4	0.00134915	21.5764
rs4797169	T	C	0.0587799	-0.002	0.0076	0.0128297	4.49346e-06	0.7963	15974	family.Veillonellaceae.id.2172	FT4	0.00131233	20.9881
rs61264131	A	C	0.202367	-0.0188	0.0178	0.0464388	6.74544e-06	0.2903	3075	family.Veillonellaceae.id.2172	FT4	0.0061376	18.9773
rs6692542	A	G	0.0534397	0.0102	0.0071	0.0118254	8.67975e-06	0.1549	15976	family.Veillonellaceae.id.2172	FT4	0.00127666	20.4195
rs6909981	C	T	-0.0638697	0.0062	0.008	0.0141765	5.47618e-06	0.4364	15976	family.Veillonellaceae.id.2172	FT4	0.00126891	20.2953
rs79535861	A	C	0.100666	0.0141	0.012	0.0207016	1.57687e-06	0.2397	15061	family.Veillonellaceae.id.2172	FT4	0.00156757	23.643
rs9345168	C	A	0.0509102	-0.0028	0.0065	0.0113253	8.48887e-06	0.666	15976	family.Veillonellaceae.id.2172	FT4	0.00126326	20.2049
rs10028567	C	T	-0.0934027	0.0145	0.0118	0.0190343	3.72497e-06	0.2218	16549	family.Streptococcaceae.id.1850	FT4	0.00145291	24.0763
rs11110281	T	C	-0.130554	0.0161	0.0128	0.0225943	1.40137e-08	0.21	15316	family.Streptococcaceae.id.1850	FT4	0.00217516	33.3831
rs16950051	A	G	0.107008	0.0134	0.0155	0.0236973	5.33808e-06	0.3865	14431	family.Streptococcaceae.id.1850	FT4	0.00141098	20.3878
rs2370083	G	T	-0.0842751	-0.002	0.0121	0.0184509	4.25666e-06	0.8686	16516	family.Streptococcaceae.id.1850	FT4	0.00126156	20.8597
rs2952251	A	G	-0.0639298	-0.0031	0.0075	0.0126525	3.72237e-07	0.6738	16612	family.Streptococcaceae.id.1850	FT4	0.0015345	25.5272
rs35344081	G	A	0.0609349	-0.0036	0.0079	0.0129703	2.63845e-06	0.6443	16624	family.Streptococcaceae.id.1850	FT4	0.00132592	22.0688
rs4968759	A	G	-0.0544035	-0.0002	0.0066	0.0111271	8.91881e-07	0.9735	16624	family.Streptococcaceae.id.1850	FT4	0.00143591	23.9021
rs57646748	G	A	-0.088021	0.004	0.0126	0.019876	7.88359e-06	0.7534	16160	family.Streptococcaceae.id.1850	FT4	0.00121213	19.6093
rs6806351	T	C	-0.0619209	0.0002	0.0082	0.0135744	6.93793e-06	0.977	16198	family.Streptococcaceae.id.1850	FT4	0.00128297	20.8056
rs72739637	A	G	0.0927983	-0.0013	0.0116	0.0192021	1.82163e-06	0.912	15111	family.Streptococcaceae.id.1850	FT4	0.00154319	23.3521
rs77968078	G	A	-0.0993013	0.0153	0.0142	0.0224788	7.9334e-06	0.2816	15519	family.Streptococcaceae.id.1850	FT4	0.0012559	19.5123
rs7916711	A	G	0.0959639	-0.0073	0.014	0.021545	6.32732e-06	0.6037	15515	family.Streptococcaceae.id.1850	FT4	0.00127707	19.8365
rs957755	T	G	-0.0642449	0.0092	0.0082	0.0142702	7.4151e-06	0.2665	16627	family.Streptococcaceae.id.1850	FT4	0.00121751	20.2658
rs9903102	C	A	-0.0693015	0.0009	0.0096	0.0154096	4.91806e-06	0.9291	16623	family.Streptococcaceae.id.1850	FT4	0.00121524	20.2232
rs10093275	C	T	0.0534595	0.0015	0.0073	0.011677	5.35228e-06	0.8319	18335	family.Ruminococcaceae.id.2050	FT4	0.00114186	20.9576
rs10166469	T	C	-0.053336	-0.0094	0.0079	0.0120209	8.5216e-06	0.234	18314	family.Ruminococcaceae.id.2050	FT4	0.00107378	19.6843
rs1158100	A	G	-0.0490539	0.0027	0.0067	0.0109865	8.60858e-06	0.6928	18333	family.Ruminococcaceae.id.2050	FT4	0.00108624	19.9335
rs1612733	T	C	0.108708	-0.0129	0.0166	0.0238006	4.22436e-06	0.4374	15016	family.Ruminococcaceae.id.2050	FT4	0.00138737	20.8589
rs17376049	T	C	0.0848534	-0.0208	0.0107	0.0172114	7.29619e-07	0.0518	18333	family.Ruminococcaceae.id.2050	FT4	0.00132403	24.303
rs2113833	T	C	0.169146	0.0215	0.0185	0.0355009	1.14466e-06	0.2452	4140	family.Ruminococcaceae.id.2050	FT4	0.00545343	22.69
rs3009418	C	A	0.0927607	0	0.0158	0.0210123	8.69024e-06	0.9993	16407	family.Ruminococcaceae.id.2050	FT4	0.00118641	19.4862
rs55793120	T	C	0.13822	-0.0149	0.016	0.0266152	1.44338e-07	0.3504	12405	family.Ruminococcaceae.id.2050	FT4	0.00216942	26.9658
rs56199908	T	C	-0.199327	0.0005	0.0164	0.0410444	1.66414e-06	0.9752	5618	family.Ruminococcaceae.id.2050	FT4	0.00418044	23.5759
rs76724913	T	G	0.0901053	0.0196	0.0129	0.0203104	9.60494e-06	0.1291	17516	family.Ruminococcaceae.id.2050	FT4	0.00112238	19.6794
rs10217435	C	T	-0.0883756	-0.0142	0.0122	0.0197506	6.5076e-06	0.2439	17679	family.Rikenellaceae.id.967	FT4	0.00113124	20.0195
rs10832801	A	C	-0.0534763	-0.0123	0.0081	0.0122666	7.50417e-06	0.1305	17199	family.Rikenellaceae.id.967	FT4	0.0011038	19.003
rs1939881	G	A	-0.105589	0.006	0.0131	0.0206213	5.64373e-07	0.6484	17434	family.Rikenellaceae.id.967	FT4	0.00150162	26.2157
rs2447496	G	A	-0.0549203	0.0071	0.0079	0.0121904	6.0861e-06	0.3654	17199	family.Rikenellaceae.id.967	FT4	0.00117872	20.2944
rs2833282	G	A	0.0711137	-0.0034	0.01	0.0156966	4.31106e-06	0.7366	17680	family.Rikenellaceae.id.967	FT4	0.0011596	20.5232
rs35909684	A	C	-0.0850181	-0.0166	0.0114	0.0191539	7.09826e-06	0.146	17565	family.Rikenellaceae.id.967	FT4	0.0011204	19.6997
rs36021379	A	G	-0.0656005	0.0091	0.0089	0.0144903	7.1952e-06	0.3064	17199	family.Rikenellaceae.id.967	FT4	0.00119026	20.4932
rs4264350	T	C	-0.0526393	-0.0062	0.0066	0.0108555	1.34832e-06	0.3521	17668	family.Rikenellaceae.id.967	FT4	0.0013291	23.5111
rs59663348	G	A	0.0570915	0.0153	0.0081	0.0125048	6.12244e-06	0.05785	17678	family.Rikenellaceae.id.967	FT4	0.00117774	20.8422
rs62532512	C	A	-0.0504257	0.0084	0.0066	0.0107399	2.76426e-06	0.2013	17672	family.Rikenellaceae.id.967	FT4	0.00124587	22.042
rs6744030	C	T	0.0696747	0.0201	0.011	0.0157103	9.31514e-06	0.06753	17564	family.Rikenellaceae.id.967	FT4	0.00111859	19.6667
rs67705352	T	G	-0.0549688	0.0133	0.0068	0.0110534	6.57556e-07	0.04968	17676	family.Rikenellaceae.id.967	FT4	0.00139718	24.7282
rs6837275	A	G	0.0570355	-0.0143	0.0077	0.011887	1.447e-06	0.06498	17199	family.Rikenellaceae.id.967	FT4	0.00133679	23.0195
rs7242694	C	T	-0.0618674	-0.0079	0.0097	0.0134882	5.80709e-06	0.4164	17199	family.Rikenellaceae.id.967	FT4	0.00122174	21.036
rs77885767	C	T	-0.156209	0.0417	0.0155	0.0336482	2.84694e-06	0.007103	8478	family.Rikenellaceae.id.967	FT4	0.00253568	21.5471
rs9389714	C	T	-0.0636841	-0.0066	0.009	0.0143416	8.79066e-06	0.4632	17680	family.Rikenellaceae.id.967	FT4	0.00111405	19.7161
rs9578457	G	A	-0.141478	0.0071	0.0152	0.0315848	3.99449e-06	0.6405	9400	family.Rikenellaceae.id.967	FT4	0.00212996	20.0601
rs9603208	G	T	0.0821173	-0.0007	0.0107	0.0159596	1.91801e-07	0.9471	17680	family.Rikenellaceae.id.967	FT4	0.00149519	26.4715
rs1035406	G	A	-0.11354	-0.0049	0.011	0.0250863	5.84451e-06	0.6536	8483	family.Rhodospirillaceae.id.2717	FT4	0.00240896	20.4797
rs11591293	G	T	0.0743184	-0.0033	0.0067	0.0158724	2.67148e-06	0.6192	8500	family.Rhodospirillaceae.id.2717	FT4	0.00257258	21.9182
rs1549633	A	C	0.0999312	0.0033	0.0094	0.0218634	4.70392e-06	0.7244	8010	family.Rhodospirillaceae.id.2717	FT4	0.00260138	20.8862
rs1923415	A	G	-0.0999238	-0.0047	0.0097	0.0227326	9.63701e-06	0.6296	8501	family.Rhodospirillaceae.id.2717	FT4	0.00226769	19.3169
rs3754624	C	T	0.0971389	0.0081	0.0089	0.0200064	1.7148e-06	0.3658	8496	family.Rhodospirillaceae.id.2717	FT4	0.00276714	23.5693
rs4278423	T	C	0.107529	0.0109	0.0099	0.0235725	3.12021e-06	0.2689	8501	family.Rhodospirillaceae.id.2717	FT4	0.0024418	20.8037
rs55876211	C	T	-0.0911851	0.0076	0.0086	0.0196395	2.86679e-06	0.3788	8494	family.Rhodospirillaceae.id.2717	FT4	0.00253147	21.5518
rs61933850	G	A	0.164808	0.0315	0.0174	0.0360647	7.22582e-06	0.07026	6830	family.Rhodospirillaceae.id.2717	FT4	0.00304823	20.877
rs6679026	T	C	0.111984	0.0041	0.0106	0.0251088	9.94679e-06	0.6948	8497	family.Rhodospirillaceae.id.2717	FT4	0.00233549	19.8864
rs7001029	C	T	0.117366	-0.0061	0.0108	0.0261324	5.3475e-06	0.5711	8044	family.Rhodospirillaceae.id.2717	FT4	0.00250129	20.1658
rs72714493	A	G	0.0816858	-0.0004	0.0079	0.0180791	7.34924e-06	0.9616	8497	family.Rhodospirillaceae.id.2717	FT4	0.00239679	20.4097
rs74354280	C	T	-0.0911896	-0.0034	0.0091	0.0204907	6.67295e-06	0.7055	8501	family.Rhodospirillaceae.id.2717	FT4	0.00232432	19.8004
rs76784716	A	G	0.136049	-0.0037	0.0126	0.0285767	1.48988e-06	0.7678	8498	family.Rhodospirillaceae.id.2717	FT4	0.00266007	22.6603
rs9813022	A	G	-0.0842444	0.0143	0.007	0.0163583	2.53124e-07	0.04193	8498	family.Rhodospirillaceae.id.2717	FT4	0.00311125	26.5156
rs12057990	C	T	0.0589878	0.0177	0.0078	0.0132268	8.9748e-06	0.02415	14867	family.Prevotellaceae.id.960	FT4	0.00133601	19.8863
rs12118202	T	C	-0.0751986	0.0049	0.008	0.0147265	5.54234e-07	0.5454	14869	family.Prevotellaceae.id.960	FT4	0.00175056	26.0712
rs13069367	A	C	-0.0539768	0.0032	0.0068	0.0119687	7.39489e-06	0.6396	14860	family.Prevotellaceae.id.960	FT4	0.0013668	20.3357
rs148376875	T	G	0.084515	-0.0164	0.0121	0.0179163	2.08029e-06	0.1763	14289	family.Prevotellaceae.id.960	FT4	0.00155486	22.2489
rs2206482	T	G	-0.0569105	0.0076	0.0065	0.0117486	1.30377e-06	0.2428	14808	family.Prevotellaceae.id.960	FT4	0.00158207	23.4612
rs2278540	G	A	0.0554249	-0.0014	0.0071	0.0123265	8.43592e-06	0.8434	14847	family.Prevotellaceae.id.960	FT4	0.00135989	20.215
rs3758087	T	C	0.0564199	-0.0013	0.007	0.0124655	8.60581e-06	0.8478	14871	family.Prevotellaceae.id.960	FT4	0.00137565	20.4827
rs3860225	A	G	0.083936	0.0173	0.0094	0.0167936	5.49682e-07	0.06394	14871	family.Prevotellaceae.id.960	FT4	0.00167703	24.9776
rs4493272	T	C	-0.0604992	0.0021	0.0069	0.0118027	3.02312e-07	0.7565	14867	family.Prevotellaceae.id.960	FT4	0.00176419	26.271
rs4685827	T	C	-0.0679529	0.0039	0.0082	0.0145407	2.77192e-06	0.6346	14867	family.Prevotellaceae.id.960	FT4	0.00146684	21.8366
rs7252711	A	G	-0.0740876	0.0141	0.0099	0.0161926	5.56586e-06	0.1577	14540	family.Prevotellaceae.id.960	FT4	0.0014377	20.9314
rs7975087	C	A	-0.0601448	-0.0061	0.0075	0.0135454	7.59459e-06	0.416	14871	family.Prevotellaceae.id.960	FT4	0.00132403	19.713
rs912860	G	A	-0.229046	-0.001	0.0208	0.0483124	9.2992e-07	0.9606	3479	family.Prevotellaceae.id.960	FT4	0.00641915	22.4636
rs9586501	G	A	0.0592681	0.0041	0.0071	0.0127329	2.58988e-06	0.5612	14868	family.Prevotellaceae.id.960	FT4	0.00145513	21.6634
rs9958960	G	A	-0.0914807	-0.007	0.0092	0.0173611	1.06324e-07	0.4498	14061	family.Prevotellaceae.id.960	FT4	0.00197074	27.7614
rs10805326	G	A	0.0566637	0.0025	0.0072	0.012276	4.03396e-06	0.7341	16061	family.Peptostreptococcaceae.id.2042	FT4	0.0013248	21.3031
rs117020988	C	T	0.182411	-0.0309	0.0153	0.0372126	1.02794e-06	0.04351	6831	family.Peptostreptococcaceae.id.2042	FT4	0.0035052	24.0212
rs12377846	C	A	-0.252	0.0067	0.0187	0.0511627	7.26254e-07	0.7193	3736	family.Peptostreptococcaceae.id.2042	FT4	0.00645175	24.2473
rs12986312	T	G	0.0571818	-0.0084	0.0076	0.0125947	5.76718e-06	0.2709	15970	family.Peptostreptococcaceae.id.2042	FT4	0.00128906	20.6103
rs1467258	G	A	0.072584	0.001	0.0101	0.0162321	7.89804e-06	0.9236	15584	family.Peptostreptococcaceae.id.2042	FT4	0.00128143	19.9929
rs1520207	C	T	0.0525658	-0.0041	0.0066	0.0112476	3.16548e-06	0.5339	16057	family.Peptostreptococcaceae.id.2042	FT4	0.00135841	21.839
rs4692811	C	T	0.0642075	-0.0112	0.0076	0.0126913	4.21123e-07	0.1392	16061	family.Peptostreptococcaceae.id.2042	FT4	0.0015911	25.5922
rs59865771	C	T	-0.0573764	-0.0025	0.0079	0.0127192	7.69029e-06	0.7485	16040	family.Peptostreptococcaceae.id.2042	FT4	0.00126704	20.3466
rs59987323	C	T	-0.0537078	-0.0081	0.01	0.011443	2.70082e-06	0.4199	15584	family.Peptostreptococcaceae.id.2042	FT4	0.00141157	22.0262
rs61841503	G	A	0.0919658	-0.0038	0.0089	0.0161331	9.8012e-09	0.6715	15333	family.Peptostreptococcaceae.id.2042	FT4	0.00211481	32.4908
rs6721459	A	G	0.0509823	-0.0101	0.0068	0.0111975	5.07756e-06	0.1351	16061	family.Peptostreptococcaceae.id.2042	FT4	0.00128903	20.7273
rs76982728	T	C	0.124203	-0.0216	0.0157	0.0266923	3.24058e-06	0.1697	11185	family.Peptostreptococcaceae.id.2042	FT4	0.00193203	21.6477
rs77540684	T	G	0.106725	0.0153	0.014	0.0245638	8.13712e-06	0.2733	13495	family.Peptostreptococcaceae.id.2042	FT4	0.00139689	18.8747
rs9573937	A	G	-0.0693637	-0.0043	0.0082	0.0142907	1.70589e-06	0.5945	16061	family.Peptostreptococcaceae.id.2042	FT4	0.00146469	23.556
rs117452796	A	G	-0.257982	-0.0264	0.0155	0.0549569	3.15296e-06	0.089	3161	family.Peptococcaceae.id.2024	FT4	0.00692299	22.0222
rs12144792	C	T	0.064399	0.0028	0.0068	0.0141246	5.82242e-06	0.6801	10718	family.Peptococcaceae.id.2024	FT4	0.00193577	20.7839
rs12634826	T	G	-0.0739885	0.0117	0.0078	0.0150931	1.01109e-06	0.1351	10381	family.Peptococcaceae.id.2024	FT4	0.00230955	24.0263
rs12992764	T	G	0.0684213	0.0066	0.0072	0.0141137	1.46158e-06	0.3568	10444	family.Peptococcaceae.id.2024	FT4	0.00224521	23.4973
rs150600492	A	C	0.135774	0.0017	0.0132	0.0289757	2.31305e-06	0.9002	9761	family.Peptococcaceae.id.2024	FT4	0.00224438	21.9521
rs35703006	G	T	0.0812655	0.0069	0.0081	0.0164355	4.94775e-07	0.3941	10715	family.Peptococcaceae.id.2024	FT4	0.00227647	24.4435
rs4990837	A	G	0.0910387	0.0221	0.0089	0.0185869	1.74194e-06	0.01315	10718	family.Peptococcaceae.id.2024	FT4	0.00223332	23.9858
rs75430375	C	T	-0.147941	-0.0076	0.0137	0.0317498	3.40849e-06	0.5777	8375	family.Peptococcaceae.id.2024	FT4	0.00258574	21.7065
rs75898026	A	G	-0.0821779	0.0141	0.0093	0.0173541	2.0221e-06	0.1294	10444	family.Peptococcaceae.id.2024	FT4	0.00214242	22.4192
rs10965428	C	A	-0.119902	-0.0048	0.0112	0.0258219	4.29151e-06	0.6674	8873	family.Pasteurellaceae.id.3689	FT4	0.00242411	21.5565
rs111582866	G	A	-0.113957	0.0063	0.0117	0.0256403	7.06627e-06	0.5881	8616	family.Pasteurellaceae.id.3689	FT4	0.00228738	19.7486
rs12050685	A	G	-0.0670948	-0.0008	0.0067	0.015239	9.18513e-06	0.9053	9411	family.Pasteurellaceae.id.3689	FT4	0.00205559	19.3809
rs16970009	A	G	0.187381	-0.0017	0.0156	0.0429572	7.31531e-06	0.9154	4703	family.Pasteurellaceae.id.3689	FT4	0.00402952	19.0194
rs35510	A	G	0.122729	-0.0173	0.0129	0.0264958	4.01576e-06	0.1799	8671	family.Pasteurellaceae.id.3689	FT4	0.00246831	21.4507
rs4822728	T	C	0.0685479	0.0025	0.007	0.0149032	4.71847e-06	0.7158	9412	family.Pasteurellaceae.id.3689	FT4	0.00224269	21.1512
rs6972479	A	G	-0.0781862	0.0054	0.0078	0.0175366	7.74817e-06	0.4888	8616	family.Pasteurellaceae.id.3689	FT4	0.00230179	19.8733
rs72756943	G	A	0.13988	-0.0106	0.0147	0.0303029	3.35218e-06	0.4693	8020	family.Pasteurellaceae.id.3689	FT4	0.00264982	21.3027
rs73139353	A	C	-0.222573	-0.0022	0.0159	0.0484634	8.71314e-06	0.8897	4047	family.Pasteurellaceae.id.3689	FT4	0.00518471	21.0815
rs76022354	C	T	0.24289	0.0104	0.0168	0.0500406	1.82858e-06	0.5365	3692	family.Pasteurellaceae.id.3689	FT4	0.00634087	23.5471
rs78909003	T	C	-0.241159	-0.0013	0.0165	0.0498372	2.04893e-06	0.9384	3638	family.Pasteurellaceae.id.3689	FT4	0.00639517	23.4025
rs9382510	C	T	-0.0881865	-0.0066	0.0078	0.0169965	2.476e-07	0.3978	9410	family.Pasteurellaceae.id.3689	FT4	0.0028527	26.915
rs9895850	T	C	-0.176406	0.0066	0.0155	0.041017	9.08251e-06	0.67	4737	family.Pasteurellaceae.id.3689	FT4	0.00388961	18.4892
rs9938097	T	C	-0.0710386	0.0033	0.0073	0.0158024	8.22604e-06	0.6489	9402	family.Pasteurellaceae.id.3689	FT4	0.00214481	20.2045
rs111966731	T	C	0.204031	0.0058	0.0152	0.0445746	4.56318e-06	0.7026	4387	family.Oxalobacteraceae.id.2966	FT4	0.00475314	20.9421
rs11246212	T	C	0.13607	-0.0066	0.0101	0.0291797	4.50836e-06	0.511	5130	family.Oxalobacteraceae.id.2966	FT4	0.00422097	21.7369
rs12002250	A	C	0.196145	0.0162	0.0146	0.044523	5.53202e-06	0.2652	4726	family.Oxalobacteraceae.id.2966	FT4	0.0040899	19.4
rs1569853	T	C	-0.140043	-0.006	0.009	0.0281704	7.45179e-07	0.5017	4997	family.Oxalobacteraceae.id.2966	FT4	0.00492134	24.7037
rs17138946	G	T	-0.189444	0.0023	0.0142	0.0430248	8.09008e-06	0.8701	4776	family.Oxalobacteraceae.id.2966	FT4	0.00404296	19.3794
rs36057338	G	T	0.181604	0.021	0.0133	0.0398742	6.25787e-06	0.1155	4738	family.Oxalobacteraceae.id.2966	FT4	0.00435887	20.734
rs4428215	G	A	0.12561	-0.0038	0.0076	0.0230053	4.87931e-08	0.6224	5167	family.Oxalobacteraceae.id.2966	FT4	0.0057366	29.8005
rs561239	A	G	0.105525	-0.0037	0.0076	0.0236769	7.1938e-06	0.626	4989	family.Oxalobacteraceae.id.2966	FT4	0.00396573	19.8558
rs6000536	C	T	-0.118383	-0.0019	0.0083	0.0241355	7.38718e-07	0.821	5166	family.Oxalobacteraceae.id.2966	FT4	0.00463546	24.049
rs62435498	C	A	0.181521	-0.0065	0.0156	0.0400608	7.45831e-06	0.676	4780	family.Oxalobacteraceae.id.2966	FT4	0.00427687	20.5227
rs736744	C	T	0.105642	0.0055	0.0067	0.0200648	1.49416e-07	0.4137	5167	family.Oxalobacteraceae.id.2966	FT4	0.00533632	27.7099
rs7993559	C	A	0.0921059	-0.0161	0.0075	0.0201114	5.03729e-06	0.0322	4989	family.Oxalobacteraceae.id.2966	FT4	0.00418655	20.9661
rs80330081	A	C	-0.18756	-0.0101	0.0142	0.0423688	6.63998e-06	0.4779	4672	family.Oxalobacteraceae.id.2966	FT4	0.00417702	19.5885
rs934049	G	A	0.109751	0.0118	0.0089	0.0238636	4.21147e-06	0.1876	4951	family.Oxalobacteraceae.id.2966	FT4	0.00425406	21.1433
rs10202904	T	G	-0.121754	-0.006	0.0069	0.0235357	3.0143e-07	0.3811	3695	family.Methanobacteriaceae.id.121	FT4	0.00719054	26.747
rs10424197	G	A	-0.111274	-0.0024	0.0076	0.0247517	9.27887e-06	0.7546	3698	family.Methanobacteriaceae.id.121	FT4	0.00543558	20.1997
rs4257531	G	A	0.164498	-0.0138	0.0108	0.0364959	7.44344e-06	0.1994	3162	family.Methanobacteriaceae.id.121	FT4	0.00638397	20.303
rs56131665	G	A	0.178661	0.0021	0.0111	0.039298	6.17992e-06	0.8485	3572	family.Methanobacteriaceae.id.121	FT4	0.00575311	20.6574
rs6508769	T	C	0.153519	-0.0089	0.0097	0.0344519	8.22529e-06	0.3575	3319	family.Methanobacteriaceae.id.121	FT4	0.00594705	19.8444
rs6776814	T	C	-0.199566	-0.0077	0.011	0.0411825	1.63062e-06	0.4806	3385	family.Methanobacteriaceae.id.121	FT4	0.00688948	23.4688
rs73068003	G	T	-0.15814	-0.007	0.01	0.0351803	8.44583e-06	0.4864	3692	family.Methanobacteriaceae.id.121	FT4	0.0054432	20.1953
rs73457410	A	G	0.21534	-0.005	0.0123	0.0436695	1.40855e-06	0.6867	3498	family.Methanobacteriaceae.id.121	FT4	0.0069034	24.3021
rs75208022	C	T	-0.227245	-0.0019	0.0124	0.048763	5.92103e-06	0.8759	3203	family.Methanobacteriaceae.id.121	FT4	0.00673465	21.7038
rs894996	C	A	0.216999	0.0001	0.0123	0.0449076	1.87557e-06	0.991	3582	family.Methanobacteriaceae.id.121	FT4	0.00647634	23.3364
rs11674854	C	T	-0.0830224	-0.0072	0.0075	0.0175267	2.59545e-06	0.335	6750	family.Lactobacillaceae.id.1836	FT4	0.00331316	22.4315
rs1530559	G	A	0.0772453	-0.0326	0.0078	0.0176921	9.65254e-06	2.999e-05	6750	family.Lactobacillaceae.id.1836	FT4	0.00281615	19.057
rs16861661	G	A	-0.193287	0.0254	0.0141	0.0379293	2.70131e-07	0.07063	5385	family.Lactobacillaceae.id.1836	FT4	0.00479934	25.9595
rs62314653	C	A	0.177082	-0.0113	0.0147	0.0392269	6.5919e-06	0.4418	6016	family.Lactobacillaceae.id.1836	FT4	0.00337601	20.3721
rs74599091	A	G	0.191613	0.0082	0.0161	0.0425039	7.69522e-06	0.6095	4951	family.Lactobacillaceae.id.1836	FT4	0.00408808	20.315
rs768253	T	G	-0.0792344	0.003	0.0066	0.0170604	3.60763e-06	0.649	7059	family.Lactobacillaceae.id.1836	FT4	0.00304635	21.5638
rs921925	A	C	0.0999419	-0.011	0.008	0.0201687	5.77195e-07	0.1696	7053	family.Lactobacillaceae.id.1836	FT4	0.00346941	24.5479
rs9345899	A	G	-0.124042	-0.0198	0.0106	0.0278946	9.4459e-06	0.06221	6602	family.Lactobacillaceae.id.1836	FT4	0.00298621	19.768
rs10402491	C	T	0.0661701	0.0017	0.011	0.014851	7.58351e-06	0.8757	18334	family.Lachnospiraceae.id.1987	FT4	0.00108165	19.8503
rs11139361	T	C	0.0494463	0.0066	0.0067	0.0110503	4.26262e-06	0.3224	18333	family.Lachnospiraceae.id.1987	FT4	0.00109096	20.0202
rs112040820	A	G	0.0549584	0.0074	0.0079	0.0117086	2.41836e-06	0.3522	17512	family.Lachnospiraceae.id.1987	FT4	0.00125655	22.0298
rs11841382	G	T	-0.0718128	0.006	0.0125	0.017462	9.57773e-06	0.6313	18340	family.Lachnospiraceae.id.1987	FT4	0.000921335	16.911
rs11979110	T	C	-0.0500924	-0.0015	0.0065	0.0105069	1.81843e-06	0.8155	18339	family.Lachnospiraceae.id.1987	FT4	0.00123789	22.7274
rs1205443	A	G	0.0501415	0.0002	0.0072	0.0112157	7.28844e-06	0.9832	17779	family.Lachnospiraceae.id.1987	FT4	0.00112291	19.9844
rs12760724	A	C	-0.0484566	-0.0027	0.0069	0.0107934	7.26734e-06	0.6941	18340	family.Lachnospiraceae.id.1987	FT4	0.00109777	20.1531
rs13005175	A	G	0.0993483	0.0025	0.0128	0.0218395	8.37071e-06	0.8486	16893	family.Lachnospiraceae.id.1987	FT4	0.00122348	20.6911
rs146660815	T	C	-0.215114	-0.0058	0.0169	0.0476778	6.53238e-06	0.7343	4112	family.Lachnospiraceae.id.1987	FT4	0.00492614	20.3467
rs2159863	A	G	-0.0585831	-0.0066	0.0082	0.0128742	3.69557e-06	0.4197	18340	family.Lachnospiraceae.id.1987	FT4	0.00112775	20.7041
rs2910921	T	C	0.160302	0.0007	0.0166	0.035832	8.41974e-06	0.9669	6549	family.Lachnospiraceae.id.1987	FT4	0.00304674	20.008
rs3127230	C	T	-0.0503537	-0.0006	0.007	0.0112201	6.20325e-06	0.9323	18340	family.Lachnospiraceae.id.1987	FT4	0.00109697	20.1384
rs35524804	T	C	-0.0607481	-0.0022	0.0084	0.0125216	2.44999e-06	0.7933	17859	family.Lachnospiraceae.id.1987	FT4	0.00131619	23.5342
rs7359994	T	C	-0.0503142	-0.0013	0.0068	0.0112482	5.35899e-06	0.85	18340	family.Lachnospiraceae.id.1987	FT4	0.00108979	20.0065
rs79086868	T	C	0.0776723	0.0024	0.0102	0.0164472	3.01422e-06	0.8182	17522	family.Lachnospiraceae.id.1987	FT4	0.00127119	22.2996
rs959845	C	T	-0.0493666	0.0001	0.0077	0.0107801	5.1695e-06	0.9858	17859	family.Lachnospiraceae.id.1987	FT4	0.00117287	20.9686
rs9929145	G	A	-0.125721	-0.007	0.0149	0.0245233	2.83594e-07	0.6373	15866	family.Lachnospiraceae.id.1987	FT4	0.00165376	26.2786
rs118170811	A	G	0.151619	0.019	0.0182	0.0317112	1.80357e-06	0.2981	9645	family.FamilyXIII.id.1957	FT4	0.00236457	22.8556
rs12904405	A	G	-0.0851896	0.0048	0.0117	0.0192688	7.67412e-06	0.6794	16643	family.FamilyXIII.id.1957	FT4	0.00117306	19.5438
rs1887048	G	A	0.0579979	-0.0064	0.0083	0.0129602	9.65391e-06	0.4453	16717	family.FamilyXIII.id.1957	FT4	0.00119652	20.0239
rs3098182	G	T	0.0508511	0.0014	0.0071	0.011014	4.04024e-06	0.8463	16731	family.FamilyXIII.id.1957	FT4	0.00127243	21.3136
rs482905	G	T	0.0596528	0.0015	0.0075	0.012717	3.72345e-06	0.8381	16737	family.FamilyXIII.id.1957	FT4	0.00131293	22.0008
rs6501525	A	G	0.0561559	-0.0052	0.0074	0.0115587	1.23726e-06	0.483	16269	family.FamilyXIII.id.1957	FT4	0.00144871	23.6003
rs66753613	G	A	0.0651136	-0.0037	0.0088	0.0144251	8.08288e-06	0.6722	16269	family.FamilyXIII.id.1957	FT4	0.00125083	20.3728
rs6797051	C	T	-0.0805984	0.0019	0.0099	0.0171364	4.89281e-06	0.8477	16737	family.FamilyXIII.id.1957	FT4	0.00131996	22.1188
rs7514702	T	C	-0.0663236	-0.0071	0.0085	0.0141626	3.91642e-06	0.402	16737	family.FamilyXIII.id.1957	FT4	0.0013086	21.9281
rs10759623	C	T	-0.162115	0.0084	0.0088	0.032151	5.78312e-07	0.3389	3156	family.FamilyXI.id.1936	FT4	0.00799161	25.4086
rs11547158	A	G	-0.177599	0.0053	0.0098	0.0372795	2.70219e-06	0.5915	3133	family.FamilyXI.id.1936	FT4	0.00719197	22.6812
rs17379710	T	C	-0.116383	-0.0068	0.0065	0.0252125	3.97107e-06	0.2981	3156	family.FamilyXI.id.1936	FT4	0.00670644	21.2949
rs2155352	A	G	-0.150538	-0.0034	0.008	0.0302319	6.63432e-07	0.6721	3150	family.FamilyXI.id.1936	FT4	0.00780986	24.7789
rs2156611	T	C	-0.112486	-0.0057	0.0065	0.0251099	9.42661e-06	0.3793	3155	family.FamilyXI.id.1936	FT4	0.00632058	20.0555
rs3733511	A	G	0.128253	-0.0018	0.0072	0.0274718	3.38554e-06	0.8029	3156	family.FamilyXI.id.1936	FT4	0.00685865	21.7816
rs488164	T	G	0.117998	-0.0067	0.0067	0.025516	4.79785e-06	0.32	3149	family.FamilyXI.id.1936	FT4	0.00674544	21.3721
rs697771	A	G	-0.117677	0.0078	0.0065	0.0251491	3.19372e-06	0.2315	3152	family.FamilyXI.id.1936	FT4	0.00689836	21.8808
rs1074800	A	G	0.0492438	0.0002	0.0072	0.010887	6.14583e-06	0.978	17789	family.Erysipelotrichaceae.id.2149	FT4	0.00114877	20.4567
rs10781552	C	T	-0.0552212	0.0099	0.0072	0.0116074	2.33114e-06	0.1719	17789	family.Erysipelotrichaceae.id.2149	FT4	0.00127068	22.6304
rs17530232	A	G	0.10305	0.043	0.0195	0.0224648	2.79123e-06	0.02718	16622	family.Erysipelotrichaceae.id.2149	FT4	0.00126433	21.0397
rs1884466	C	T	-0.0475363	-0.0023	0.0068	0.0106939	9.52701e-06	0.7355	18205	family.Erysipelotrichaceae.id.2149	FT4	0.00108423	19.7576
rs2300774	G	A	0.0524152	0.0102	0.0066	0.0106784	8.95466e-07	0.1236	18216	family.Erysipelotrichaceae.id.2149	FT4	0.00132092	24.0911
rs290833	T	G	-0.0497374	0.0058	0.0072	0.0111376	8.029e-06	0.4183	17789	family.Erysipelotrichaceae.id.2149	FT4	0.0011198	19.9402
rs35161940	T	C	-0.0806041	-0.0058	0.0102	0.0167641	1.8451e-06	0.5684	18213	family.Erysipelotrichaceae.id.2149	FT4	0.00126771	23.1157
rs4078432	C	T	-0.0608929	0.0015	0.0088	0.0133764	4.23104e-06	0.8635	17789	family.Erysipelotrichaceae.id.2149	FT4	0.00116359	20.7209
rs56970041	T	G	0.0724144	0.015	0.0101	0.0164471	5.40344e-06	0.1378	18217	family.Erysipelotrichaceae.id.2149	FT4	0.001063	19.3832
rs62504403	C	T	0.0681159	-0.0258	0.0084	0.0127883	1.12265e-07	0.002074	16981	family.Erysipelotrichaceae.id.2149	FT4	0.00166794	28.3673
rs7234058	T	C	-0.0945759	0.0125	0.0122	0.0194091	9.12341e-07	0.3037	16874	family.Erysipelotrichaceae.id.2149	FT4	0.00140515	23.741
rs7826267	T	G	-0.0839071	0.0138	0.0153	0.0199131	9.28449e-06	0.3666	17586	family.Erysipelotrichaceae.id.2149	FT4	0.00100859	17.753
rs8003149	C	T	0.0538798	0.005	0.0076	0.0116888	4.08475e-06	0.5131	18213	family.Erysipelotrichaceae.id.2149	FT4	0.00116526	21.2454
rs11026530	T	C	0.0822408	-0.0159	0.0098	0.0186379	9.42684e-06	0.1066	13485	family.Enterobacteriaceae.id.3469	FT4	0.00144179	19.4678
rs2374342	C	A	0.0582927	0.0111	0.0071	0.0126195	4.51618e-06	0.1167	13577	family.Enterobacteriaceae.id.3469	FT4	0.00156913	21.3345
rs35673018	G	A	0.0899642	0.0069	0.0133	0.0202934	7.63109e-06	0.6049	13326	family.Enterobacteriaceae.id.3469	FT4	0.00147261	19.65
rs504442	T	G	0.084159	-0.0093	0.0103	0.0189479	5.17092e-06	0.3663	13578	family.Enterobacteriaceae.id.3469	FT4	0.00145082	19.7249
rs62210023	A	G	0.0606754	0.0014	0.0071	0.0130125	3.13163e-06	0.8456	13515	family.Enterobacteriaceae.id.3469	FT4	0.00160616	21.739
rs78143293	A	G	-0.0848521	0.0033	0.0088	0.0170415	1.19564e-06	0.7126	13572	family.Enterobacteriaceae.id.3469	FT4	0.00182336	24.7882
rs79757635	C	A	0.0758597	0.0057	0.0101	0.0171286	9.31857e-06	0.5755	13419	family.Enterobacteriaceae.id.3469	FT4	0.00145957	19.6117
rs112381107	C	T	0.211435	0.0147	0.0155	0.0456962	2.81875e-06	0.3419	4455	family.Desulfovibrionaceae.id.3169	FT4	0.00478262	21.3994
rs11599763	T	C	-0.0555931	0.0048	0.0069	0.0117493	2.49704e-06	0.4812	15142	family.Desulfovibrionaceae.id.3169	FT4	0.00147635	22.385
rs17791387	A	G	-0.0729251	-0.0059	0.0086	0.0154381	2.09678e-06	0.495	15045	family.Desulfovibrionaceae.id.3169	FT4	0.00148092	22.3106
rs2692012	A	G	0.114231	0.0005	0.0142	0.0253568	1.5639e-06	0.9745	13080	family.Desulfovibrionaceae.id.3169	FT4	0.00154915	20.2913
rs2838334	G	A	0.0571419	-0.0116	0.0071	0.012423	3.82375e-06	0.1011	15142	family.Desulfovibrionaceae.id.3169	FT4	0.0013953	21.1544
rs3935584	C	T	-0.0525838	0	0.0068	0.0115757	6.78137e-06	0.9983	15140	family.Desulfovibrionaceae.id.3169	FT4	0.0013611	20.6324
rs4506934	C	T	-0.0943381	-0.0078	0.012	0.020138	3.16043e-06	0.5141	15035	family.Desulfovibrionaceae.id.3169	FT4	0.00145749	21.9424
rs6058181	C	T	0.0834742	0.0167	0.0095	0.0166111	2.69912e-07	0.07794	15074	family.Desulfovibrionaceae.id.3169	FT4	0.00167245	25.2494
rs72647048	T	C	-0.0770089	-0.0133	0.01	0.017089	9.60885e-06	0.18	15142	family.Desulfovibrionaceae.id.3169	FT4	0.00133931	20.3043
rs9928243	C	A	-0.0541732	-0.0032	0.0066	0.0117819	4.48478e-06	0.6304	15141	family.Desulfovibrionaceae.id.3169	FT4	0.00139437	21.1389
rs112893842	T	C	0.110761	0.0137	0.0103	0.0232545	2.75032e-06	0.1859	8203	family.Defluviitaleaceae.id.1924	FT4	0.00275798	22.6807
rs1582238	T	C	0.0801923	-0.0043	0.0068	0.0167061	1.692e-06	0.5288	8002	family.Defluviitaleaceae.id.1924	FT4	0.00287123	23.036
rs17051335	C	T	-0.134314	-0.0039	0.013	0.0292201	4.58117e-06	0.7666	8031	family.Defluviitaleaceae.id.1924	FT4	0.002624	21.1235
rs1908593	T	C	0.070223	-0.0046	0.0068	0.0156601	7.859e-06	0.5005	8203	family.Defluviitaleaceae.id.1924	FT4	0.00244532	20.1032
rs4344384	G	T	0.0708803	-0.0039	0.0066	0.0156121	5.86011e-06	0.5546	8200	family.Defluviitaleaceae.id.1924	FT4	0.00250741	20.6074
rs4677103	A	G	0.0977203	0.0021	0.0109	0.0197033	9.42189e-07	0.8497	8002	family.Defluviitaleaceae.id.1924	FT4	0.00306452	24.5915
rs540220	T	C	-0.123954	0.0066	0.0122	0.0289814	9.48137e-06	0.5852	7887	family.Defluviitaleaceae.id.1924	FT4	0.00231399	18.2881
rs55658617	T	C	0.177314	-0.0039	0.0192	0.0361845	1.40608e-06	0.8372	6676	family.Defluviitaleaceae.id.1924	FT4	0.003584	24.0056
rs72731813	C	T	-0.149751	0.0066	0.0133	0.0293415	2.75777e-07	0.6223	7786	family.Defluviitaleaceae.id.1924	FT4	0.00333434	26.0414
rs9608282	T	G	0.139014	-0.0012	0.0139	0.0299429	4.60831e-06	0.9333	7736	family.Defluviitaleaceae.id.1924	FT4	0.00277846	21.5485
rs9725395	A	G	-0.138357	-0.0023	0.0127	0.0295185	3.4137e-06	0.8565	8031	family.Defluviitaleaceae.id.1924	FT4	0.00272807	21.9636
rs11073596	T	G	0.0510212	-0.0009	0.0079	0.0114339	8.14449e-06	0.9113	17527	family.Coriobacteriaceae.id.811	FT4	0.00113478	19.9096
rs11250875	T	C	0.06075	-0.0065	0.008	0.0130939	4.82844e-06	0.4208	17690	family.Coriobacteriaceae.id.811	FT4	0.00121534	21.5232
rs11656361	A	C	0.0773006	0.0088	0.0142	0.017553	8.02017e-06	0.5346	16665	family.Coriobacteriaceae.id.811	FT4	0.0011624	19.3915
rs12974142	G	A	0.0789796	-0.0163	0.0116	0.0177205	8.51232e-06	0.161	17413	family.Coriobacteriaceae.id.811	FT4	0.00113949	19.8623
rs13307134	C	T	0.0565686	0.0139	0.0082	0.0126265	7.79931e-06	0.08857	17527	family.Coriobacteriaceae.id.811	FT4	0.00114388	20.0695
rs1397793	G	A	-0.0498855	0.0131	0.0072	0.0112446	9.77381e-06	0.06814	17527	family.Coriobacteriaceae.id.811	FT4	0.00112166	19.6792
rs1816223	A	G	-0.0586265	0.0076	0.0079	0.0129006	4.84114e-06	0.3331	17688	family.Coriobacteriaceae.id.811	FT4	0.00116623	20.65
rs240104	T	C	-0.0603429	-0.0016	0.008	0.0126849	1.51603e-06	0.8373	17577	family.Coriobacteriaceae.id.811	FT4	0.0012858	22.6271
rs2442778	G	A	-0.116408	-0.0035	0.0141	0.0258545	9.02703e-06	0.8051	13472	family.Coriobacteriaceae.id.811	FT4	0.00150249	20.2689
rs3025411	A	G	0.0926543	0.0019	0.0161	0.0209468	8.26912e-06	0.9052	15671	family.Coriobacteriaceae.id.811	FT4	0.00124698	19.5632
rs34739816	G	T	0.0965017	0.0104	0.0123	0.0207666	3.88358e-06	0.3982	16593	family.Coriobacteriaceae.id.811	FT4	0.00129972	21.5917
rs67561917	A	G	-0.0714367	-0.0028	0.0116	0.0154113	5.39129e-06	0.8061	17333	family.Coriobacteriaceae.id.811	FT4	0.00123808	21.4838
rs719099	A	G	0.0778402	-0.0017	0.0103	0.0155815	5.43317e-07	0.8714	17687	family.Coriobacteriaceae.id.811	FT4	0.00140904	24.954
rs8010111	G	A	-0.103377	0.0011	0.014	0.0229286	6.89624e-06	0.9379	15996	family.Coriobacteriaceae.id.811	FT4	0.00126919	20.3253
rs10517600	T	G	0.0626993	0.001	0.0066	0.0139364	6.82768e-06	0.8855	10512	family.ClostridialesvadinBB60group.id.11286	FT4	0.00192177	20.2367
rs10904722	C	T	-0.0672314	0.0003	0.0069	0.0147123	5.04837e-06	0.9658	10512	family.ClostridialesvadinBB60group.id.11286	FT4	0.0019826	20.8785
rs118104867	C	T	0.214464	-0.03	0.0162	0.0455098	3.43598e-06	0.06393	4095	family.ClostridialesvadinBB60group.id.11286	FT4	0.00539382	22.1966
rs13409132	A	G	-0.165419	-0.0125	0.0156	0.0352154	4.37231e-06	0.4223	5913	family.ClostridialesvadinBB60group.id.11286	FT4	0.00371773	22.0575
rs17121075	G	A	0.0769254	0.0042	0.0088	0.0172234	7.91417e-06	0.6375	10512	family.ClostridialesvadinBB60group.id.11286	FT4	0.00189407	19.9444
rs2191834	G	T	0.0746375	-0.0078	0.0079	0.0159136	2.50195e-06	0.3218	10511	family.ClostridialesvadinBB60group.id.11286	FT4	0.00208845	21.9935
rs28691777	C	T	0.137134	0.0088	0.0135	0.0266996	6.95697e-07	0.5168	10199	family.ClostridialesvadinBB60group.id.11286	FT4	0.00257988	26.375
rs34088226	A	G	-0.117807	-0.0011	0.0138	0.026924	7.66216e-06	0.9352	9716	family.ClostridialesvadinBB60group.id.11286	FT4	0.00196662	19.1414
rs55682560	C	T	-0.131519	-0.0013	0.0123	0.0261319	4.97034e-07	0.9165	9183	family.ClostridialesvadinBB60group.id.11286	FT4	0.00275079	25.3247
rs6588624	G	A	-0.0662317	0.0035	0.0065	0.0138147	1.79287e-06	0.5902	10512	family.ClostridialesvadinBB60group.id.11286	FT4	0.00218181	22.981
rs66714985	A	C	0.116908	0.0138	0.0127	0.0252447	4.85334e-06	0.2776	10512	family.ClostridialesvadinBB60group.id.11286	FT4	0.00203599	21.442
rs7226487	A	G	-0.0643682	-0.001	0.0065	0.0138701	3.58282e-06	0.8786	10505	family.ClostridialesvadinBB60group.id.11286	FT4	0.00204595	21.5327
rs7538034	T	G	-0.078598	-0.01	0.0082	0.0165982	2.36706e-06	0.2212	10420	family.ClostridialesvadinBB60group.id.11286	FT4	0.00214733	22.419
rs7725895	A	G	-0.116224	0.008	0.0127	0.0240367	3.94356e-06	0.5263	10512	family.ClostridialesvadinBB60group.id.11286	FT4	0.00221916	23.3753
rs989682	A	G	0.070194	0.0041	0.0072	0.0155364	6.8471e-06	0.5727	10129	family.ClostridialesvadinBB60group.id.11286	FT4	0.00201121	20.4086
rs10875374	C	T	-0.0536759	-0.0004	0.0065	0.0119436	8.09821e-06	0.9565	14253	family.Clostridiaceae1.id.1869	FT4	0.00141504	20.1943
rs12186080	G	A	0.0748236	-0.0094	0.0091	0.016246	5.33957e-06	0.3042	14244	family.Clostridiaceae1.id.1869	FT4	0.00148699	21.2092
rs12341505	G	A	0.0814503	-0.0106	0.0101	0.0179338	4.54486e-06	0.2973	14250	family.Clostridiaceae1.id.1869	FT4	0.00144543	20.6243
rs2795528	G	A	-0.180969	-0.0253	0.0164	0.0390911	3.80626e-06	0.1235	6411	family.Clostridiaceae1.id.1869	FT4	0.00333179	21.4248
rs2817172	C	T	0.0563367	-0.0018	0.0072	0.012392	5.27026e-06	0.8016	13789	family.Clostridiaceae1.id.1869	FT4	0.00149663	20.665
rs4723021	T	C	-0.106376	-0.0006	0.0147	0.0241944	7.42147e-06	0.9689	13682	family.Clostridiaceae1.id.1869	FT4	0.0014109	19.3284
rs550843	T	C	-0.0734787	0.0025	0.0103	0.0168383	7.09119e-06	0.8099	14234	family.Clostridiaceae1.id.1869	FT4	0.00133603	19.0399
rs56188186	A	G	0.0967774	-0.001	0.0127	0.0217471	8.24444e-06	0.9361	13218	family.Clostridiaceae1.id.1869	FT4	0.00149598	19.8006
rs62397761	A	G	0.0615805	0.0011	0.0074	0.0136198	9.07706e-06	0.8779	14248	family.Clostridiaceae1.id.1869	FT4	0.00143274	20.4401
rs881532	A	G	-0.0533035	-0.0049	0.0065	0.0119011	7.89662e-06	0.4518	14250	family.Clostridiaceae1.id.1869	FT4	0.00140577	20.0576
rs117186816	G	A	-0.206476	0.0122	0.018	0.0436362	6.51964e-06	0.4967	4310	family.Christensenellaceae.id.1866	FT4	0.00516792	22.379
rs12380890	A	G	-0.0503972	-0.0062	0.0066	0.0111047	5.78132e-06	0.3484	16846	family.Christensenellaceae.id.1866	FT4	0.00122115	20.5942
rs12657403	A	G	0.078108	0.0157	0.0105	0.0171887	5.59276e-06	0.1361	16245	family.Christensenellaceae.id.1866	FT4	0.00126951	20.6468
rs4076564	G	A	-0.188623	-0.0077	0.0185	0.039209	8.06105e-06	0.6769	3730	family.Christensenellaceae.id.1866	FT4	0.00616627	23.1305
rs62573205	G	A	-0.0654804	0.0036	0.0083	0.0133503	1.48853e-06	0.6653	16838	family.Christensenellaceae.id.1866	FT4	0.00142669	24.0541
rs7211194	C	T	0.0492094	0.0042	0.0067	0.0110916	9.93998e-06	0.5259	16436	family.Christensenellaceae.id.1866	FT4	0.00119616	19.6812
rs72706624	G	T	0.0882626	0.0143	0.0118	0.0197575	6.3775e-06	0.2267	14869	family.Christensenellaceae.id.1866	FT4	0.00134037	19.9541
rs77867022	G	T	-0.160443	-0.0145	0.0172	0.0379589	8.81983e-06	0.3972	4033	family.Christensenellaceae.id.1866	FT4	0.00441031	17.8567
rs870002	C	T	0.0488951	0.0116	0.0067	0.0109817	6.54323e-06	0.08198	16847	family.Christensenellaceae.id.1866	FT4	0.00117533	19.8217
rs892686	A	G	0.0506107	-0.0003	0.0065	0.0109651	4.12367e-06	0.9605	16847	family.Christensenellaceae.id.1866	FT4	0.00126296	21.3015
rs9608766	T	C	-0.0682134	-0.0058	0.0089	0.01496	3.33084e-06	0.5174	16185	family.Christensenellaceae.id.1866	FT4	0.00128295	20.7886
rs10831953	G	A	0.0537537	-0.0023	0.0068	0.0123746	9.94742e-06	0.7329	14915	family.Bifidobacteriaceae.id.433	FT4	0.00126352	18.8668
rs13020688	G	A	0.0584045	-0.003	0.0074	0.0122081	1.57375e-06	0.6837	14795	family.Bifidobacteriaceae.id.433	FT4	0.00154457	22.8841
rs182549	C	T	0.11707	-0.0179	0.0081	0.0126703	5.942e-20	0.02684	14915	family.Bifidobacteriaceae.id.433	FT4	0.0056913	85.3602
rs4957061	T	C	0.0569873	0.0089	0.0085	0.0116907	1.1517e-06	0.2959	14795	family.Bifidobacteriaceae.id.433	FT4	0.00160347	23.7582
rs540489	T	G	-0.0632518	0.0148	0.0084	0.013817	5.36811e-06	0.07863	14688	family.Bifidobacteriaceae.id.433	FT4	0.00142475	20.9538
rs55888705	A	G	0.053673	0.0064	0.007	0.0120586	8.66208e-06	0.3647	14914	family.Bifidobacteriaceae.id.433	FT4	0.00132662	19.8088
rs6899771	A	G	-0.0914312	-0.0018	0.0112	0.0202604	7.27995e-06	0.8729	14150	family.Bifidobacteriaceae.id.433	FT4	0.00143719	20.3626
rs7174549	C	T	0.0551726	-0.0136	0.0069	0.0124655	6.8678e-06	0.04775	14915	family.Bifidobacteriaceae.id.433	FT4	0.00131171	19.5872
rs7322849	T	C	0.110676	0.0031	0.0132	0.0200996	1.74032e-08	0.8158	14915	family.Bifidobacteriaceae.id.433	FT4	0.00202874	30.3161
rs73797465	T	G	-0.0942612	-0.0042	0.0146	0.0208421	4.8495e-06	0.773	14795	family.Bifidobacteriaceae.id.433	FT4	0.0013806	20.4514
rs857444	C	T	0.0553965	-0.0031	0.0069	0.0120669	3.82492e-06	0.6556	14914	family.Bifidobacteriaceae.id.433	FT4	0.00141112	21.0723
rs10872669	A	G	-0.123071	-0.0082	0.0115	0.0275665	9.4901e-06	0.4719	7368	family.BacteroidalesS24.7group.id	FT4	0.00269787	19.9263
rs12748533	G	T	-0.0821108	-0.007	0.0072	0.0172701	2.59019e-06	0.3298	7948	family.BacteroidalesS24.7group.id	FT4	0.0028361	22.5998
rs17043785	T	C	-0.176187	0.0226	0.0157	0.0347133	5.11837e-07	0.1507	5208	family.BacteroidalesS24.7group.id	FT4	0.004922	25.7507
rs61508842	T	C	0.122574	0.0069	0.011	0.0272389	7.82782e-06	0.532	7576	family.BacteroidalesS24.7group.id	FT4	0.00266577	20.2445
rs689695	C	A	0.0814578	-0.0022	0.0071	0.0167057	1.28039e-06	0.7519	7954	family.BacteroidalesS24.7group.id	FT4	0.00298027	23.7699
rs738193	T	C	0.0847328	0.0072	0.007	0.0165856	3.82163e-07	0.302	7778	family.BacteroidalesS24.7group.id	FT4	0.0033444	26.0933
rs78609301	A	G	-0.0867065	-0.0014	0.0081	0.0195709	7.09297e-06	0.8661	7953	family.BacteroidalesS24.7group.id	FT4	0.00246197	19.6234
rs941000	C	T	0.0850266	0.005	0.0067	0.0163382	3.15557e-07	0.4498	7778	family.BacteroidalesS24.7group.id	FT4	0.00346994	27.0762
rs11585893	A	G	-0.0740746	0.0089	0.0102	0.0147633	1.79511e-06	0.3834	17821	family.Bacteroidaceae.id.917	FT4	0.00141067	25.1722
rs13207588	A	G	-0.059205	-0.0075	0.0096	0.0131195	7.48504e-06	0.4329	17707	family.Bacteroidaceae.id.917	FT4	0.00114879	20.3627
rs1340391	T	C	-0.0592004	-0.0012	0.0081	0.0132244	6.7301e-06	0.8828	18302	family.Bacteroidaceae.id.917	FT4	0.00109376	20.0377
rs17619981	T	G	0.0880978	0.0034	0.0112	0.0187002	2.68683e-06	0.7597	15801	family.Bacteroidaceae.id.917	FT4	0.00140263	22.1913
rs2023437	T	C	-0.0782325	-0.0033	0.0105	0.0167634	5.01824e-06	0.7561	17484	family.Bacteroidaceae.id.917	FT4	0.00124414	21.7771
rs66474973	G	T	0.0812515	0.0041	0.0103	0.0164479	6.80966e-07	0.6895	17405	family.Bacteroidaceae.id.917	FT4	0.0014001	24.4001
rs66710942	C	T	0.0488038	-0.0093	0.0069	0.0107412	5.86259e-06	0.1779	17821	family.Bacteroidaceae.id.917	FT4	0.00115709	20.642
rs6795673	C	T	0.0538565	0.0024	0.0066	0.0105251	3.37909e-07	0.7115	18301	family.Bacteroidaceae.id.917	FT4	0.00142865	26.1803
rs9507307	C	T	0.0604456	0.0033	0.0095	0.0129128	2.1271e-06	0.729	18184	family.Bacteroidaceae.id.917	FT4	0.00120359	21.91
rs112135816	T	G	-0.0775052	-0.0028	0.0097	0.0171554	5.27662e-06	0.7714	15545	family.Alcaligenaceae.id.2875	FT4	0.0013113	20.4083
rs1153990	A	G	-0.058727	-0.0126	0.0078	0.0128306	5.96787e-06	0.1062	16808	family.Alcaligenaceae.id.2875	FT4	0.00124488	20.9475
rs147968	C	T	0.0489475	0.0074	0.0066	0.0110321	9.12701e-06	0.2631	16810	family.Alcaligenaceae.id.2875	FT4	0.00116969	19.6831
rs28480294	T	C	-0.0516967	-0.0031	0.0073	0.0115503	6.606e-06	0.6733	16377	family.Alcaligenaceae.id.2875	FT4	0.00122172	20.0301
rs4033856	C	T	0.081834	-0.0116	0.0104	0.0168931	1.02902e-06	0.262	15623	family.Alcaligenaceae.id.2875	FT4	0.0014998	23.4635
rs62191117	A	G	0.0684302	0.0122	0.0085	0.0133636	2.75943e-07	0.1488	16688	family.Alcaligenaceae.id.2875	FT4	0.00156878	26.2178
rs62395635	T	C	0.110583	0.0048	0.0133	0.0238514	3.34696e-06	0.7156	14802	family.Alcaligenaceae.id.2875	FT4	0.00145009	21.4926
rs6969323	A	C	-0.0593564	-0.0109	0.0077	0.0129137	3.88581e-06	0.1576	16810	family.Alcaligenaceae.id.2875	FT4	0.00125523	21.1244
rs74776516	T	G	-0.0944052	-0.0068	0.0156	0.0213287	6.85049e-06	0.6623	14502	family.Alcaligenaceae.id.2875	FT4	0.00134912	19.5887
rs7638039	T	C	0.0603335	-0.002	0.008	0.0127779	2.70479e-06	0.8003	16791	family.Alcaligenaceae.id.2875	FT4	0.00132601	22.2919
rs9537886	A	C	-0.0570888	-0.0184	0.007	0.0110683	2.35108e-07	0.008096	16807	family.Alcaligenaceae.id.2875	FT4	0.0015804	26.6007
rs9964679	A	G	0.0537051	-0.0091	0.0071	0.0116008	4.47389e-06	0.2023	16810	family.Alcaligenaceae.id.2875	FT4	0.00127331	21.429
rs2889192	G	T	0.0887537	0.0057	0.008	0.0195009	3.64417e-06	0.4768	7710	family.Actinomycetaceae.id.421	FT4	0.00267945	20.7087
rs34583783	G	T	0.123756	0.0084	0.0104	0.026427	5.47971e-06	0.4242	7710	family.Actinomycetaceae.id.421	FT4	0.00283627	21.9242
rs35011108	A	G	0.241826	-0.0299	0.0206	0.0503796	1.8267e-06	0.1456	3630	family.Actinomycetaceae.id.421	FT4	0.00630729	23.0281
rs4073240	G	A	0.0747546	0.0021	0.0068	0.0164684	6.05333e-06	0.7625	7710	family.Actinomycetaceae.id.421	FT4	0.0026654	20.5998
rs58484246	T	C	0.0761407	0.0027	0.0075	0.0169007	6.12428e-06	0.7202	7710	family.Actinomycetaceae.id.421	FT4	0.00262561	20.2915
rs262812	T	C	-0.065675	-0.0002	0.008	0.0142257	3.24906e-06	0.9834	12099	family.Acidaminococcaceae.id.2166	FT4	0.0017585	21.31
rs2933324	A	G	-0.0662557	0.008	0.0072	0.0140257	2.23676e-06	0.2645	12525	family.Acidaminococcaceae.id.2166	FT4	0.00177848	22.3116
rs45497800	T	C	-0.117863	0.0278	0.0176	0.0257351	5.86428e-06	0.113	11316	family.Acidaminococcaceae.id.2166	FT4	0.00185014	20.9713
rs6589457	A	G	0.165911	0.0165	0.0149	0.0349516	2.31508e-06	0.2678	7386	family.Acidaminococcaceae.id.2166	FT4	0.00304147	22.5267
rs6923842	T	C	-0.0796106	0.0049	0.0081	0.0169192	2.21303e-06	0.5435	11904	family.Acidaminococcaceae.id.2166	FT4	0.00185644	22.1364
rs74540770	G	A	-0.108969	0.0148	0.0132	0.0243533	7.08804e-06	0.2633	10606	family.Acidaminococcaceae.id.2166	FT4	0.00188418	20.0175
rs78702810	T	C	-0.143755	0.022	0.0177	0.0323244	9.16468e-06	0.2139	7992	family.Acidaminococcaceae.id.2166	FT4	0.00246864	19.7733
rs117107102	A	G	0.204683	0.0151	0.0177	0.0431573	2.91821e-06	0.3944	4975	class.Verrucomicrobiae.id.4029	FT4	0.00450094	22.4844
rs11729256	T	C	0.0749798	-0.0159	0.0078	0.0150177	6.7309e-07	0.04195	11861	class.Verrucomicrobiae.id.4029	FT4	0.00209725	24.9235
rs12908520	G	A	0.0618926	-0.005	0.0065	0.0130946	2.17163e-06	0.4435	11863	class.Verrucomicrobiae.id.4029	FT4	0.00187966	22.3366
rs2602429	C	T	0.0746844	0.0003	0.0086	0.0156194	2.58297e-06	0.9712	11690	class.Verrucomicrobiae.id.4029	FT4	0.00195194	22.8589
rs4242783	G	A	0.0689292	0.0039	0.0077	0.0147693	2.63612e-06	0.6111	11690	class.Verrucomicrobiae.id.4029	FT4	0.00185979	21.7777
rs4936098	A	G	0.0648843	-0.0024	0.0072	0.0135928	1.12221e-06	0.7428	11858	class.Verrucomicrobiae.id.4029	FT4	0.00191785	22.7817
rs61779207	G	A	-0.0758309	0.01	0.0084	0.0167762	6.72285e-06	0.2331	11591	class.Verrucomicrobiae.id.4029	FT4	0.00175963	20.4283
rs74542928	T	C	0.112164	-0.0143	0.0117	0.0236422	1.63222e-06	0.2224	11216	class.Verrucomicrobiae.id.4029	FT4	0.00200272	22.5036
rs9349825	A	G	-0.0704036	0.003	0.0074	0.0147128	2.53687e-06	0.6854	11858	class.Verrucomicrobiae.id.4029	FT4	0.0019273	22.8942
rs941682	G	A	-0.0631436	-0.004	0.0072	0.0143767	9.61003e-06	0.5757	11809	class.Verrucomicrobiae.id.4029	FT4	0.00163086	19.287
rs1135612	G	A	0.0529785	-0.0002	0.0076	0.0119177	9.26307e-06	0.9809	18164	class.Negativicutes.id.2164	FT4	0.00108676	19.7592
rs13086907	G	A	0.0625312	0.0051	0.0084	0.0131735	1.95488e-06	0.5407	18163	class.Negativicutes.id.2164	FT4	0.00123898	22.5291
rs1643968	T	C	-0.0565284	0.0039	0.0072	0.0112298	4.14596e-07	0.5851	18170	class.Negativicutes.id.2164	FT4	0.00139261	25.3362
rs1649999	A	G	0.0748989	0.0278	0.0112	0.0166458	7.5812e-06	0.01335	18036	class.Negativicutes.id.2164	FT4	0.00112128	20.2439
rs2834062	A	G	0.0489057	-0.0105	0.0071	0.0108842	8.4392e-06	0.1372	18171	class.Negativicutes.id.2164	FT4	0.00110986	20.1874
rs4463806	T	C	-0.0543966	-0.0045	0.0082	0.0129365	7.80662e-06	0.5799	18160	class.Negativicutes.id.2164	FT4	0.000972681	17.6791
rs4722181	T	G	0.0501306	0.0015	0.0066	0.0105798	2.00112e-06	0.8199	18163	class.Negativicutes.id.2164	FT4	0.0012346	22.4493
rs60274479	T	C	-0.0659623	0.0119	0.0092	0.0134137	1.1623e-06	0.1974	17610	class.Negativicutes.id.2164	FT4	0.00137132	24.1794
rs61249479	A	C	0.0777075	0.0135	0.0115	0.0168628	2.95471e-06	0.2416	18165	class.Negativicutes.id.2164	FT4	0.00116768	21.2333
rs71405394	G	A	-0.114178	0.0182	0.0151	0.02405	2.16631e-06	0.2279	13861	class.Negativicutes.id.2164	FT4	0.00162343	22.5358
rs73232831	G	A	-0.151829	0.0124	0.016	0.0314932	1.87452e-06	0.4384	9382	class.Negativicutes.id.2164	FT4	0.00247119	23.2372
rs9423647	G	A	0.047817	0.0063	0.0065	0.0105282	6.06114e-06	0.3332	18164	class.Negativicutes.id.2164	FT4	0.00113436	20.6257
rs10108398	G	A	0.0769142	0.0054	0.0076	0.0153953	1.09e-06	0.4754	10932	class.Mollicutes.id.3920	FT4	0.00227797	24.9551
rs11890098	A	G	0.074438	0.0049	0.0079	0.0153389	9.56571e-07	0.5352	11392	class.Mollicutes.id.3920	FT4	0.00206304	23.5466
rs12566890	T	G	-0.101147	-0.0056	0.0131	0.0230978	3.65095e-06	0.6711	11371	class.Mollicutes.id.3920	FT4	0.00168358	19.1729
rs17214486	C	A	0.06099	-0.0013	0.0069	0.0135623	6.60866e-06	0.8503	11387	class.Mollicutes.id.3920	FT4	0.00177285	20.2198
rs2464826	A	C	0.0944239	0.0087	0.0103	0.0211806	8.39505e-06	0.3953	10998	class.Mollicutes.id.3920	FT4	0.0018038	19.8705
rs28537087	G	A	0.0820873	0.0062	0.01	0.0188312	8.07399e-06	0.5311	11382	class.Mollicutes.id.3920	FT4	0.00166669	18.9986
rs3768491	A	G	-0.0681052	-0.0031	0.0072	0.0149061	4.23352e-06	0.6703	11002	class.Mollicutes.id.3920	FT4	0.00189381	20.8715
rs4885016	T	C	-0.0819606	-0.0101	0.0091	0.0181628	7.26986e-06	0.2707	11388	class.Mollicutes.id.3920	FT4	0.00178493	20.3596
rs6043847	T	C	-0.114937	-0.0054	0.0138	0.0248606	4.55476e-06	0.6944	11130	class.Mollicutes.id.3920	FT4	0.00191677	21.3707
rs72901605	T	C	-0.0841852	0.0246	0.0085	0.0178119	3.2579e-06	0.003894	10526	class.Mollicutes.id.3920	FT4	0.00211771	22.3341
rs74603314	T	C	0.221639	-0.0123	0.016	0.0462918	1.55689e-06	0.4407	4499	class.Mollicutes.id.3920	FT4	0.00506947	22.9136
rs78169027	A	G	-0.108283	-0.0074	0.0115	0.0237289	5.8761e-06	0.5225	10542	class.Mollicutes.id.3920	FT4	0.00197144	20.8201
rs10202904	T	G	-0.121754	-0.006	0.0069	0.0235357	3.0143e-07	0.3811	3695	class.Methanobacteria.id.119	FT4	0.00719054	26.747
rs10424197	G	A	-0.111274	-0.0024	0.0076	0.0247517	9.27887e-06	0.7546	3698	class.Methanobacteria.id.119	FT4	0.00543558	20.1997
rs4257531	G	A	0.164498	-0.0138	0.0108	0.0364959	7.44344e-06	0.1994	3162	class.Methanobacteria.id.119	FT4	0.00638397	20.303
rs56131665	G	A	0.178661	0.0021	0.0111	0.039298	6.17992e-06	0.8485	3572	class.Methanobacteria.id.119	FT4	0.00575311	20.6574
rs6508769	T	C	0.153519	-0.0089	0.0097	0.0344519	8.22529e-06	0.3575	3319	class.Methanobacteria.id.119	FT4	0.00594705	19.8444
rs6776814	T	C	-0.199566	-0.0077	0.011	0.0411825	1.63062e-06	0.4806	3385	class.Methanobacteria.id.119	FT4	0.00688948	23.4688
rs73068003	G	T	-0.15814	-0.007	0.01	0.0351803	8.44583e-06	0.4864	3692	class.Methanobacteria.id.119	FT4	0.0054432	20.1953
rs73457410	A	G	0.21534	-0.005	0.0123	0.0436695	1.40855e-06	0.6867	3498	class.Methanobacteria.id.119	FT4	0.0069034	24.3021
rs75208022	C	T	-0.227245	-0.0019	0.0124	0.048763	5.92103e-06	0.8759	3203	class.Methanobacteria.id.119	FT4	0.00673465	21.7038
rs894996	C	A	0.216999	0.0001	0.0123	0.0449076	1.87557e-06	0.991	3582	class.Methanobacteria.id.119	FT4	0.00647634	23.3364
rs1002941	G	A	0.105025	0.0111	0.0073	0.0233484	8.14836e-06	0.1283	4734	class.Lentisphaeria.id.2250	FT4	0.00425588	20.2249
rs11770843	C	T	0.109431	0.0144	0.0073	0.0234879	1.90729e-06	0.04677	4705	class.Lentisphaeria.id.2250	FT4	0.00459233	21.6974
rs17114848	G	A	0.152377	-0.0035	0.0118	0.0324332	4.05865e-06	0.7674	4734	class.Lentisphaeria.id.2250	FT4	0.004641	22.0636
rs2031282	A	G	0.122369	0.0041	0.0095	0.0270329	4.3826e-06	0.6695	4734	class.Lentisphaeria.id.2250	FT4	0.00430972	20.4819
rs2825714	A	G	-0.13741	0.0041	0.0105	0.0289246	1.72211e-06	0.698	4734	class.Lentisphaeria.id.2250	FT4	0.00474471	22.559
rs62570196	C	T	-0.21635	0.0009	0.0134	0.0439866	1.07926e-06	0.944	3712	class.Lentisphaeria.id.2250	FT4	0.00647509	24.1792
rs72640280	A	G	0.220207	0.0113	0.0148	0.0486196	5.18035e-06	0.4425	3816	class.Lentisphaeria.id.2250	FT4	0.0053469	20.5027
rs77599476	A	G	0.230292	-0.0193	0.0158	0.0480168	1.86133e-06	0.2218	3722	class.Lentisphaeria.id.2250	FT4	0.00614212	22.9899
rs11181912	G	A	-0.0579153	0.0037	0.0069	0.0118796	9.94762e-07	0.5966	16017	class.Gammaproteobacteria.id.3303	FT4	0.00148168	23.7643
rs12404135	A	G	-0.0788843	-0.0046	0.0096	0.0172415	8.89485e-06	0.6339	15231	class.Gammaproteobacteria.id.3303	FT4	0.00137248	20.9302
rs2234691	T	C	0.0762905	0.0073	0.0098	0.0171962	8.39264e-06	0.4566	16011	class.Gammaproteobacteria.id.3303	FT4	0.00122779	19.6799
rs6706173	A	C	0.074251	-0.0015	0.0094	0.0146392	1.99495e-07	0.8726	16020	class.Gammaproteobacteria.id.3303	FT4	0.00160328	25.7225
rs75101789	C	T	0.0729012	0.0007	0.0093	0.0163003	8.78789e-06	0.9436	16024	class.Gammaproteobacteria.id.3303	FT4	0.00124672	19.9998
rs79795896	A	G	-0.15921	-0.0015	0.0163	0.0351373	7.92404e-06	0.9272	7577	class.Gammaproteobacteria.id.3303	FT4	0.00270228	20.5253
rs9494710	C	T	-0.0549673	0.0016	0.0069	0.0120924	4.54607e-06	0.8184	15650	class.Gammaproteobacteria.id.3303	FT4	0.00131855	20.6599
rs1074800	A	G	0.0492438	0.0002	0.0072	0.010887	6.14583e-06	0.978	17789	class.Erysipelotrichia.id.2147	FT4	0.00114877	20.4567
rs10781552	C	T	-0.0552212	0.0099	0.0072	0.0116074	2.33114e-06	0.1719	17789	class.Erysipelotrichia.id.2147	FT4	0.00127068	22.6304
rs17530232	A	G	0.10305	0.043	0.0195	0.0224648	2.79123e-06	0.02718	16622	class.Erysipelotrichia.id.2147	FT4	0.00126433	21.0397
rs1884466	C	T	-0.0475363	-0.0023	0.0068	0.0106939	9.52701e-06	0.7355	18205	class.Erysipelotrichia.id.2147	FT4	0.00108423	19.7576
rs2300774	G	A	0.0524152	0.0102	0.0066	0.0106784	8.95466e-07	0.1236	18216	class.Erysipelotrichia.id.2147	FT4	0.00132092	24.0911
rs290833	T	G	-0.0497374	0.0058	0.0072	0.0111376	8.029e-06	0.4183	17789	class.Erysipelotrichia.id.2147	FT4	0.0011198	19.9402
rs35161940	T	C	-0.0806041	-0.0058	0.0102	0.0167641	1.8451e-06	0.5684	18213	class.Erysipelotrichia.id.2147	FT4	0.00126771	23.1157
rs4078432	C	T	-0.0608929	0.0015	0.0088	0.0133764	4.23104e-06	0.8635	17789	class.Erysipelotrichia.id.2147	FT4	0.00116359	20.7209
rs56970041	T	G	0.0724144	0.015	0.0101	0.0164471	5.40344e-06	0.1378	18217	class.Erysipelotrichia.id.2147	FT4	0.001063	19.3832
rs62504403	C	T	0.0681159	-0.0258	0.0084	0.0127883	1.12265e-07	0.002074	16981	class.Erysipelotrichia.id.2147	FT4	0.00166794	28.3673
rs7234058	T	C	-0.0945759	0.0125	0.0122	0.0194091	9.12341e-07	0.3037	16874	class.Erysipelotrichia.id.2147	FT4	0.00140515	23.741
rs7826267	T	G	-0.0839071	0.0138	0.0153	0.0199131	9.28449e-06	0.3666	17586	class.Erysipelotrichia.id.2147	FT4	0.00100859	17.753
rs8003149	C	T	0.0538798	0.005	0.0076	0.0116888	4.08475e-06	0.5131	18213	class.Erysipelotrichia.id.2147	FT4	0.00116526	21.2454
rs1035691	A	G	-0.055176	-0.0145	0.0068	0.0121602	9.65172e-06	0.03306	15168	class.Deltaproteobacteria.id.3087	FT4	0.00135551	20.5856
rs112381107	C	T	0.206594	0.0147	0.0155	0.0456908	4.63054e-06	0.3419	4457	class.Deltaproteobacteria.id.3087	FT4	0.00456613	20.4354
rs11599763	T	C	-0.0544219	0.0048	0.0069	0.0117397	3.94123e-06	0.4812	15168	class.Deltaproteobacteria.id.3087	FT4	0.00141479	21.4872
rs17084793	G	A	-0.0710762	-0.0162	0.0088	0.015953	5.68634e-06	0.0667	15164	class.Deltaproteobacteria.id.3087	FT4	0.00130732	19.8475
rs17791387	A	G	-0.0735881	-0.0059	0.0086	0.0154246	1.60223e-06	0.495	15071	class.Deltaproteobacteria.id.3087	FT4	0.00150796	22.7577
rs2692012	A	G	0.110335	0.0005	0.0142	0.0253336	3.14186e-06	0.9745	13104	class.Deltaproteobacteria.id.3087	FT4	0.00144544	18.9656
rs2838334	G	A	0.0561722	-0.0116	0.0071	0.0124124	5.44551e-06	0.1011	15168	class.Deltaproteobacteria.id.3087	FT4	0.00134839	20.4774
[truncated: 6,312 more rows]
